# Supplementary material for: A genome-wide CRISPR screen identifies N-acetylglucosamine-1-phosphate transferase as a potential antiviral target for Ebola virus
Source: Nat Commun. 2019 Jan 17;10:285. doi: 10.1038/s41467-018-08135-4 (PMC6336797; doi:10.1038/s41467-018-08135-4)
Supplement: Supplementary file 5 — Supplementary Data 2 [file 41467_2018_8135_MOESM5_ESM.xlsx]

## Sheet: Suppl Data File 2 Overview
Supplementary Data File 2. MAGeCK analysis output of CRISPR screen at the gene level.
Column	Content
id	Gene ID
num	The number of targeting sgRNAs for each gene
neg|score	The RRA lo value of this gene in negative selection
neg|p-value	The raw p-value (using permutation) of this gene in negative selection
neg|fdr	The false discovery rate of this gene in negative selection
neg|rank	The ranking of this gene in negative selection
neg|goodsgrna	The number of "good" sgRNAs, i.e., sgRNAs whose ranking is below the alpha cutoff, in negative selection
neg|LFC	The log2 fold change of this gene in negative selection.
pos|score	The RRA lo value of this gene in positive selection
pos|p-value	The raw p-value of this gene in positive selection
pos|fdr	The false discovery rate of this gene in positive selection
pos|rank	The ranking of this gene in positive selection
pos|goodsgrna	The number of "good" sgRNAs, i.e., sgRNAs whose ranking is below the alpha cutoff, in positive selection
pos|LFC	The log2 fold change of this gene in positive selection.

## Sheet: Supplementary_Data_File_2
id	num	neg|score	neg|p-value	neg|fdr	neg|rank	neg|goodsgrna	neg|lfc	pos|score	pos|p-value	pos|fdr	pos|rank	pos|goodsgrna	pos|lfc
NPC1	5	1	1	1	16985	0	13.133	1.37e-15	2.83e-07	0.000707	1	5	13.133
SPNS1	4	1	1	1	16984	0	6.7117	1.22e-08	2.83e-07	0.000707	2	4	6.7117
SLC30A1	5	1	1	1	16983	0	7.4232	5.39e-08	1.42e-06	0.003094	3	4	7.4232
VPS16	6	0.99963	0.99982	1	16977	0	1.7336	3.29e-05	0.00031201	0.444484	4	3	1.7336
FAM92B	3	0.66391	0.88768	1	11520	1	-4.5759	4.63e-05	0.00017088	0.308281	5	1	-4.5759
STARD13	4	0.97601	0.99182	1	16582	0	2.4253	5.15e-05	0.00019412	0.308281	6	3	2.4253
KLHDC3	4	0.33704	0.7964	1	6897	1	4.5249	5.52e-05	0.00019412	0.308281	7	3	4.5249
F9	4	0.97748	0.99224	1	16606	0	3.1596	8.65e-05	0.00033298	0.444484	8	3	3.1596
GYPB	2	0.99988	0.99964	1	16982	0	4.3124	0.00011856	0.00035622	0.444484	9	2	4.3124
GNPTAB	4	0.99496	0.99705	1	16905	0	2.1765	0.00014902	0.00071669	0.782488	10	3	2.1765
ZNF646	4	0.23958	0.70609	1	5462	1	-0.64979	0.00019549	0.0011429	0.79725	11	2	-0.64979
POF1B	3	0.82661	0.92801	1	14088	1	-6.6312	0.00023165	0.00095983	0.79725	12	1	-6.6312
hsa-mir-659	2	0.99976	0.99947	1	16979	0	3.8737	0.00023615	0.00052965	0.616832	13	2	3.8737
VPS33A	3	0.9978	0.99787	1	16958	0	4.8105	0.00026029	0.00095983	0.79725	14	2	4.8105
IRF2BP1	2	0.62838	0.80315	1	11011	1	2.9473	0.00033975	0.00084988	0.79725	15	1	2.9473
KIAA1257	1	0.99964	1	1	16978	0	13.604	0.00035522	2.83e-07	0.000707	16	1	13.604
SLC43A2	2	0.056718	0.22125	1	1537	1	1.9104	0.00040152	0.00085045	0.79725	17	1	1.9104
UVRAG	3	0.99985	0.99965	1	16981	0	4.0677	0.00043298	0.0011514	0.79725	18	2	4.0677
hsa-mir-4752	2	0.7553	0.85977	1	12910	0	3.8394	0.00046328	0.0009757	0.79725	19	1	3.8394
hsa-mir-3691	2	0.99946	0.99876	1	16976	0	2.5735	0.00053598	0.0012398	0.79725	20	2	2.5735
SFMBT2	1	0.99946	1	1	16975	0	12.474	0.00054056	2.83e-07	0.000707	21	1	12.474
EPHX3	4	0.12597	0.53092	1	3117	3	-8.9466	0.00055589	0.0028036	0.820419	22	1	-8.9466
KCTD11	1	0.99937	1	1	16974	0	12.495	0.00063322	2.83e-07	0.000707	23	1	12.495
GRAMD1A	1	0.99927	1	1	16973	0	11.59	0.00072589	2.83e-07	0.000707	24	1	11.59
MVP	3	0.46998	0.80737	1	8810	1	-5.4874	0.00078746	0.0018882	0.79725	25	1	-5.4874
ATP13A2	3	0.33395	0.72067	1	6853	2	-8.4654	0.00088008	0.0021801	0.820419	26	1	-8.4654
REG3G	3	0.093701	0.40168	1	2392	2	-8.7796	0.00097269	0.0025009	0.820419	27	1	-8.7796
TNMD	1	0.99903	1	1	16972	0	10.428	0.000973	2.83e-07	0.000707	28	1	10.428
SNX6	3	0.97491	0.98402	1	16562	0	1.9757	0.0012505	0.0025015	0.820419	29	2	1.9757
TAS2R20	2	0.99875	0.99714	1	16971	0	1.2195	0.001252	0.0028614	0.820419	30	2	1.2195
TUBGCP5	2	0.39026	0.66988	1	7661	1	1.4822	0.0013278	0.0028614	0.820419	31	1	1.4822
UTS2	3	0.27212	0.67015	1	5998	2	-8.7224	0.0013431	0.0028506	0.820419	32	1	-8.7224
NEK10	3	0.9954	0.99597	1	16915	0	2.3717	0.0013648	0.0028506	0.820419	33	2	2.3717
EGLN2	3	0.88743	0.95108	1	15062	0	2.276	0.0013765	0.0028512	0.820419	34	2	2.276
FKBP1B	2	0.0024387	0.024451	1	74	1	0.27895	0.0013895	0.0028619	0.820419	35	1	0.27895
SMARCA2	2	0.9986	0.99714	1	16969	0	4.2858	0.0013981	0.0028619	0.820419	36	2	4.2858
DNMT3A	1	0.99859	0.99795	1	16968	0	9.0098	0.0014054	0.0020531	0.79725	37	1	9.0098
ZNF688	1	0.99856	0.99795	1	16967	0	9.3173	0.0014363	0.0020531	0.79725	38	1	9.3173
PPY	1	0.9985	0.99795	1	16966	0	8.9416	0.0014981	0.0020531	0.79725	39	1	8.9416
C8orf47	2	0.99849	0.99675	1	16965	0	3.0441	0.0015112	0.0032536	0.820419	40	2	3.0441
WNT6	2	0.98694	0.98601	1	16768	0	4.3335	0.001513	0.0032536	0.820419	41	1	4.3335
EPPIN	2	0.15625	0.45118	1	3760	1	0.50623	0.0015747	0.0037892	0.820419	42	1	0.50623
ARIH2OS	1	0.99841	0.99795	1	16964	0	9.3609	0.0015908	0.0020531	0.79725	43	1	9.3609
GRIK2	1	0.99832	0.99795	1	16963	0	9.1618	0.0016834	0.0020531	0.79725	44	1	9.1618
FDPS	2	0.9983	0.99599	1	16962	0	1.2818	0.0016992	0.0040142	0.820419	45	2	1.2818
BCAS2	3	0.94425	0.97455	1	16014	0	2.1653	0.001707	0.0036038	0.820419	46	2	2.1653
NUS1	2	0.86133	0.9145	1	14635	0	1.8856	0.0017599	0.0040142	0.820419	47	1	1.8856
SRY	2	0.9412	0.9522	1	15956	0	1.9994	0.0018216	0.0040142	0.820419	48	1	1.9994
PNMT	3	0.73227	0.90649	1	12547	1	1.744	0.0018671	0.0036044	0.820419	49	2	1.744
hsa-mir-943	3	0.44069	0.791	1	8382	1	2.0953	0.0018762	0.0036044	0.820419	50	2	2.0953
PROSC	2	0.9981	0.99599	1	16960	0	0.91593	0.0018956	0.0040142	0.820419	51	2	0.91593
CYTH2	4	0.90381	0.97091	1	15329	1	-7.3844	0.0019137	0.0052821	0.820419	52	1	-7.3844
HTR5A	1	0.99807	0.99795	1	16959	0	9.0091	0.0019306	0.0020531	0.79725	53	1	9.0091
FOXO4	2	0.82346	0.89938	1	14036	0	1.2796	0.0020068	0.0040142	0.820419	54	1	1.2796
NAP1L3	2	0.49905	0.74347	1	9215	1	0.64132	0.0020685	0.0040142	0.820419	55	1	0.64132
ITPRIPL2	2	0.85872	0.9145	1	14596	0	1.1748	0.0021919	0.0040147	0.820419	56	1	1.1748
TMEM132A	1	0.99776	0.99795	1	16957	0	8.3467	0.0022395	0.0020531	0.79725	57	1	8.3467
ZADH2	2	0.61239	0.79237	1	10760	1	0.49717	0.0023153	0.0040147	0.820419	58	1	0.49717
FOSL1	2	0.94565	0.95743	1	16043	0	2.9728	0.002377	0.0040147	0.820419	59	1	2.9728
hsa-mir-101-2	1	0.99754	0.99795	1	16954	0	8.1062	0.0024557	0.0020531	0.79725	60	1	8.1062
hsa-mir-6802	2	0.25316	0.57471	1	5721	1	-0.16327	0.0025004	0.0040147	0.820419	61	1	-0.16327
LPAR5	1	0.99748	0.99795	1	16953	0	7.7417	0.0025175	0.0020531	0.79725	62	1	7.7417
OCM	5	0.49099	0.90745	1	9114	3	-8.1091	0.0025457	0.0073565	0.820419	63	1	-8.1091
KIF13B	3	0.70115	0.89539	1	12074	1	1.2716	0.002546	0.0044262	0.820419	64	2	1.2716
ERF	3	0.61588	0.8712	1	10813	1	-7.0054	0.0025462	0.0044262	0.820419	65	1	-7.0054
IGLL5	1	0.99745	0.99795	1	16952	0	7.841	0.0025483	0.0020537	0.79725	66	1	7.841
TMEM102	3	0.59153	0.86179	1	10458	1	1.4213	0.0025672	0.0044262	0.820419	67	2	1.4213
SCNN1B	3	0.66593	0.88768	1	11559	1	1.2635	0.0026099	0.0044262	0.820419	68	2	1.2635
SLC6A8	1	0.99733	0.99795	1	16949	0	7.7153	0.0026719	0.0020537	0.79725	69	1	7.7153
CLEC2D	4	0.99465	0.99684	1	16898	0	-2.2093	0.0027211	0.005935	0.820419	70	2	-2.2093
FAM120B	1	0.99724	0.99795	1	16947	0	7.5481	0.0027646	0.0020537	0.79725	71	1	7.5481
CECR6	2	0.81712	0.89409	1	13925	0	0.70374	0.0029323	0.0078002	0.820419	72	1	0.70374
KRT27	1	0.99705	0.99795	1	16943	0	7.5485	0.0029499	0.0020537	0.79725	73	1	7.5485
SAC3D1	1	0.99702	0.99795	1	16942	0	7.4892	0.0029808	0.0020537	0.79725	74	1	7.4892
AGXT2L1	2	0.61611	0.79545	1	10816	1	0.15849	0.0030557	0.0078002	0.820419	75	1	0.15849
CCZ1B	2	0.99468	0.99268	1	16899	0	3.6196	0.0031174	0.0078002	0.820419	76	1	3.6196
NPC2	1	0.99686	0.99795	1	16940	0	7.1233	0.0031352	0.0020537	0.79725	77	1	7.1233
HORMAD2	2	0.52516	0.7573	1	9561	1	0.24337	0.0032407	0.0078002	0.820419	78	1	0.24337
WRB	4	0.2525	0.72785	1	5710	3	-8.3363	0.0032702	0.0073706	0.820419	79	1	-8.3363
PSME3	1	0.99668	0.99795	1	16939	0	7.4557	0.0033206	0.0020537	0.79725	80	1	7.4557
NDNL2	1	0.99665	0.99795	1	16938	0	7.5733	0.0033515	0.0020537	0.79725	81	1	7.5733
CTSL	3	0.86024	0.93999	1	14614	1	-1.6816	0.0033785	0.005816	0.820419	82	1	-1.6816
C3orf37	2	0.59103	0.78623	1	10449	1	-0.060939	0.0034257	0.0078002	0.820419	83	1	-0.060939
KRT14	2	0.11826	0.38701	1	2939	1	-0.34425	0.0035491	0.0078002	0.820419	84	1	-0.34425
NCOA1	1	0.99643	0.99795	1	16934	0	6.7871	0.0035677	0.0020537	0.79725	85	1	6.7871
TRIM50	1	0.99637	0.99795	1	16932	0	7.051	0.0036295	0.0020537	0.79725	86	1	7.051
hsa-mir-4731	1	0.99628	0.99795	1	16929	0	7.1446	0.0037221	0.0020537	0.79725	87	1	7.1446
SLC4A1	3	0.79472	0.92117	1	13572	1	-6.0907	0.0038408	0.0079941	0.820419	88	1	-6.0907
IFI27L1	1	0.996	0.99595	1	16926	0	6.8691	0.0040001	0.0040471	0.820419	89	1	6.8691
CYSLTR2	3	0.76681	0.91255	1	13108	1	-7.4376	0.0040256	0.01344	0.820419	90	1	-7.4376
KMT2E	1	0.99585	0.99595	1	16924	0	6.5854	0.0041546	0.0040471	0.820419	91	1	6.5854
PIK3R4	3	0.90143	0.95728	1	15297	0	0.82937	0.0041567	0.01344	0.820419	92	2	0.82937
LOC100506688	1	0.99581	0.99595	1	16923	0	6.7196	0.0041855	0.0040471	0.820419	93	1	6.7196
SF3A1	2	0.99258	0.9896	1	16860	0	3.1367	0.0042273	0.0078002	0.820419	94	1	3.1367
SRD5A2	1	0.99569	0.99595	1	16920	0	6.6619	0.004309	0.0040476	0.820419	95	1	6.6619
MAGEB17	4	0.8208	0.95819	1	13985	1	-1.8296	0.0043556	0.0090109	0.820419	96	2	-1.8296
TNFAIP3	1	0.9956	0.99595	1	16919	0	6.7882	0.0044017	0.0040476	0.820419	97	1	6.7882
CD80	2	0.62728	0.80315	1	10992	1	-0.095111	0.0044122	0.0078002	0.820419	98	1	-0.095111
GMNN	1	0.99535	0.99595	1	16914	0	6.3703	0.0046488	0.0040476	0.820419	99	1	6.3703
KRT25	2	0.96919	0.97202	1	16455	0	2.0902	0.0046588	0.0078002	0.820419	100	1	2.0902
OR52H1	1	0.99529	0.99391	1	16911	0	6.2743	0.0047106	0.0060852	0.820419	101	1	6.2743
MXRA7	2	0.0021919	0.018999	1	66	1	-1.5669	0.0047204	0.0078002	0.820419	102	1	-1.5669
ING1	1	0.99523	0.99391	1	16910	0	6.2147	0.0047723	0.0060857	0.820419	103	1	6.2147
TLR7	1	0.9952	0.99391	1	16909	0	6.2946	0.0048032	0.0060857	0.820419	104	1	6.2946
VPS18	4	0.9998	0.9998	1	16980	0	-0.71507	0.0048394	0.0090114	0.820419	105	2	-0.71507
CSNK1A1	2	0.94905	0.96159	1	16100	0	1.0372	0.0048437	0.0078002	0.820419	106	1	1.0372
MEF2BNB	3	0.68817	0.89195	1	11885	1	0.67456	0.0048555	0.016723	0.820419	107	2	0.67456
KDM5D	1	0.99507	0.99184	1	16907	0	6.4553	0.0049268	0.0081567	0.820419	108	1	6.4553
FSD1L	3	0.7128	0.8979	1	12241	1	-6.1755	0.0049495	0.016723	0.820419	109	1	-6.1755
LARP6	1	0.99489	0.99184	1	16904	0	5.97	0.0051121	0.0081567	0.820419	110	1	5.97
UPB1	1	0.99483	0.99184	1	16903	0	5.8671	0.0051739	0.0081573	0.820419	111	1	5.8671
CALY	2	0.48474	0.73408	1	9027	1	-0.49304	0.0052134	0.0078008	0.820419	112	1	-0.49304
ADRA2C	2	0.94599	0.95743	1	16050	0	0.80756	0.005275	0.0078008	0.820419	113	1	0.80756
PRPF38A	1	0.9947	0.99184	1	16900	0	6.2532	0.0052975	0.0081573	0.820419	114	1	6.2532
S100Z	1	0.99464	0.99184	1	16897	0	5.6674	0.0053592	0.0081573	0.820419	115	1	5.6674
SLAIN2	3	0.99758	0.99766	1	16955	0	0.39254	0.0054524	0.016723	0.820419	116	2	0.39254
CEBPZ	2	0.84018	0.90836	1	14309	0	0.34439	0.0054599	0.0078008	0.820419	117	1	0.34439
ATP8B4	1	0.99452	0.98984	1	16895	0	5.7276	0.0054828	0.010163	0.820419	118	1	5.7276
PBX1	3	0.97949	0.98589	1	16634	0	0.014608	0.0055036	0.016723	0.820419	119	1	0.014608
TAOK1	3	0.89594	0.95342	1	15209	0	-2.7497	0.0055959	0.016723	0.820419	120	1	-2.7497
ANKRD39	1	0.99439	0.98984	1	16892	0	6.1012	0.0056064	0.010163	0.820419	121	1	6.1012
AGPAT1	2	0.39349	0.67142	1	7706	1	-0.68823	0.0057679	0.0078008	0.820419	122	1	-0.68823
MFSD12	3	0.90808	0.96017	1	15393	0	0.33654	0.0057949	0.016723	0.820419	123	2	0.33654
KLHL40	3	0.76122	0.91167	1	13001	1	-4.033	0.0058728	0.016723	0.820419	124	1	-4.033
MAGEC3	1	0.99412	0.98984	1	16889	0	5.7618	0.0058844	0.010163	0.820419	125	1	5.7618
KRT72	1	0.99402	0.98984	1	16887	0	5.6236	0.005977	0.010163	0.820419	126	1	5.6236
FAM154B	1	0.99396	0.98984	1	16885	0	5.6005	0.0060388	0.010163	0.820419	127	1	5.6005
TMOD1	2	0.77824	0.86873	1	13284	0	-0.13129	0.0060759	0.0078008	0.820419	128	1	-0.13129
DNM2	1	0.9939	0.98984	1	16883	0	5.7851	0.0061006	0.010163	0.820419	129	1	5.7851
PCDH9	2	0.98012	0.98023	1	16649	0	1.3169	0.0061375	0.0078008	0.820419	130	1	1.3169
SOWAHB	3	0.40637	0.7633	1	7888	2	-8.2905	0.0061497	0.016723	0.820419	131	1	-8.2905
ARHGAP31	1	0.99381	0.98781	1	16881	0	5.7653	0.0061932	0.012188	0.820419	132	1	5.7653
SLCO2A1	2	0.99644	0.99427	1	16935	0	3.192	0.0063838	0.0078008	0.820419	133	1	3.192
SSPN	1	0.99359	0.98576	1	16878	0	5.5039	0.0064095	0.014239	0.820419	134	1	5.5039
ERMAP	3	0.26891	0.66723	1	5951	2	-8.7325	0.0064265	0.016723	0.820419	135	1	-8.7325
GATSL3	2	0.68643	0.82454	1	11865	1	0.25993	0.0064454	0.0078008	0.820419	136	1	0.25993
NLE1	2	0.84817	0.91086	1	14431	0	0.49648	0.006507	0.0078008	0.820419	137	1	0.49648
hsa-mir-3163	1	0.99344	0.98576	1	16876	0	5.4557	0.0065639	0.01424	0.820419	138	1	5.4557
PCDHGA10	1	0.99325	0.98368	1	16872	0	5.6138	0.0067492	0.016323	0.820419	139	1	5.6138
KCNQ1	2	0.44604	0.70203	1	8465	1	-0.88882	0.0067532	0.0078008	0.820419	140	1	-0.88882
hsa-mir-185	1	0.99322	0.98368	1	16871	0	4.7775	0.0067801	0.016323	0.820419	141	1	4.7775
EIF4A1	3	0.44413	0.79297	1	8440	2	-7.6701	0.0067956	0.016723	0.820419	142	1	-7.6701
RAB7A	1	0.99319	0.98368	1	16869	0	5.1633	0.006811	0.016323	0.820419	143	1	5.1633
MRPL2	2	0.85951	0.9145	1	14606	0	0.012981	0.0068148	0.0078008	0.820419	144	1	0.012981
CLDN9	2	0.45065	0.70664	1	8528	1	-0.82113	0.0068764	0.0078008	0.820419	145	1	-0.82113
hsa-mir-371a	2	0.93246	0.94663	1	15803	0	1.637	0.0069995	0.0078008	0.820419	146	1	1.637
TMEM41A	1	0.99285	0.98368	1	16864	0	5.6595	0.0071508	0.016323	0.820419	147	1	5.6595
TSPEAR	4	0.46658	0.8508	1	8761	2	-7.6662	0.0072085	0.022933	0.820419	148	1	-7.6662
PPP1CA	1	0.99257	0.98368	1	16859	0	5.4708	0.0074288	0.016323	0.820419	149	1	5.4708
KAL1	2	0.98253	0.9835	1	16698	0	1.9197	0.0075535	0.011595	0.820419	150	1	1.9197
MRC1	2	0.9536	0.96321	1	16192	0	0.50133	0.007615	0.011595	0.820419	151	1	0.50133
NMS	2	0.42815	0.69442	1	8210	1	-1.1338	0.0076766	0.011595	0.820419	152	1	-1.1338
BLCAP	4	0.017247	0.20505	1	494	1	-3.0572	0.0077593	0.022934	0.820419	153	2	-3.0572
OR52E4	4	0.39248	0.82177	1	7694	2	-8.1237	0.0079456	0.022934	0.820419	154	1	-8.1237
C22orf43	1	0.99202	0.98368	1	16845	0	5.3266	0.0079848	0.016323	0.820419	155	1	5.3266
RNF44	4	0.95557	0.98568	1	16226	0	-2.7749	0.0080406	0.022934	0.820419	156	2	-2.7749
TM4SF1	2	0.10399	0.35406	1	2608	1	-1.423	0.0080458	0.011595	0.820419	157	1	-1.423
ZHX3	1	0.99192	0.98368	1	16844	0	4.8634	0.0080775	0.016323	0.820419	158	1	4.8634
CNNM1	2	0.66694	0.8153	1	11575	1	-0.74398	0.0081073	0.011595	0.820419	159	1	-0.74398
DDX60	1	0.99186	0.98368	1	16842	0	5.4971	0.0081392	0.016324	0.820419	160	1	5.4971
PCSK6	2	0.95147	0.96321	1	16149	0	1.4149	0.0081688	0.011595	0.820419	161	1	1.4149
GCA	1	0.99183	0.98368	1	16841	0	4.7836	0.0081701	0.016324	0.820419	162	1	4.7836
LSM14A	2	0.77748	0.86873	1	13271	0	-0.46152	0.0082304	0.011595	0.820419	163	1	-0.46152
ZNF823	1	0.99168	0.98368	1	16837	0	4.9337	0.0083246	0.016324	0.820419	164	1	4.9337
PPIG	2	0.43314	0.69744	1	8280	1	-1.412	0.0085379	0.011596	0.820419	165	1	-1.412
OPHN1	2	0.76231	0.86276	1	13020	0	-0.62123	0.008661	0.011596	0.820419	166	1	-0.62123
LDLRAD2	4	0.47986	0.85498	1	8962	2	-6.2877	0.0086823	0.026376	0.820419	167	1	-6.2877
ZNF630	4	0.66609	0.92855	1	11562	1	-1.9569	0.0086973	0.026376	0.820419	168	2	-1.9569
ALDH1L2	2	0.9336	0.94663	1	15823	0	0.090186	0.0087225	0.011596	0.820419	169	1	0.090186
MRAS	2	0.99534	0.99301	1	16913	0	2.9771	0.0088455	0.011596	0.820419	170	1	2.9771
LBH	2	0.94535	0.95658	1	16035	0	0.072556	0.008907	0.011596	0.820419	171	1	0.072556
LRRC20	2	0.16118	0.45794	1	3881	1	-1.8561	0.0089685	0.011596	0.820419	172	1	-1.8561
KCNIP3	1	0.99103	0.98368	1	16833	0	4.6797	0.0089733	0.016324	0.820419	173	1	4.6797
S1PR1	3	0.74287	0.90735	1	12714	1	-6.0034	0.0090078	0.016724	0.820419	174	1	-6.0034
PAPD5	1	0.99096	0.98368	1	16832	0	4.3976	0.009035	0.016324	0.820419	175	1	4.3976
RNFT2	2	0.42913	0.69593	1	8225	1	-1.3017	0.0090915	0.011596	0.820419	176	1	-1.3017
OR51F2	2	0.46821	0.72033	1	8781	1	-1.1669	0.009153	0.011596	0.820419	177	1	-1.1669
SI	2	0.97813	0.97843	1	16615	0	2.4366	0.0092145	0.011596	0.820419	178	1	2.4366
LRIG1	1	0.99072	0.98368	1	16830	0	5.0132	0.0092821	0.016324	0.820419	179	1	5.0132
hsa-mir-518a-2	1	0.99063	0.98368	1	16828	0	4.4504	0.0093748	0.016324	0.820419	180	1	4.4504
CDADC1	1	0.99059	0.98368	1	16827	0	4.3544	0.0094057	0.016324	0.820419	181	1	4.3544
SAMD4B	1	0.99056	0.98368	1	16826	0	4.4265	0.0094366	0.016324	0.820419	182	1	4.4265
hsa-mir-6781	2	0.91658	0.93775	1	15538	0	1.3535	0.0094604	0.015407	0.820419	183	1	1.3535
TMEM86A	1	0.99041	0.98368	1	16823	0	4.9479	0.009591	0.016324	0.820419	184	1	4.9479
hsa-mir-520e	4	0.97183	0.99043	1	16505	0	-1.3379	0.0096154	0.028899	0.820419	185	2	-1.3379
C1QTNF4	2	0.6664	0.8153	1	11569	1	-0.69385	0.0097064	0.019164	0.820419	186	1	-0.69385
PRSS46	1	0.99022	0.98167	1	16818	0	4.9891	0.0097764	0.018335	0.820419	187	1	4.9891
PIAS1	3	0.19045	0.59207	1	4457	2	-9.0171	0.0098366	0.016724	0.820419	188	1	-9.0171
PIGY	1	0.99007	0.98167	1	16817	0	4.3972	0.0099308	0.018335	0.820419	189	1	4.3972
PGRMC2	4	0.36833	0.81067	1	7339	2	-3.7762	0.0099691	0.028899	0.820419	190	2	-3.7762
IRF1	4	0.029023	0.27231	1	825	2	-4.3655	0.010012	0.028899	0.820419	191	2	-4.3655
KCNU1	2	0.0097678	0.070817	1	284	1	-2.524	0.010075	0.019164	0.820419	192	1	-2.524
ZNF45	1	0.98988	0.98167	1	16815	0	4.3525	0.010116	0.018335	0.820419	193	1	4.3525
MKNK1	1	0.98985	0.98167	1	16814	0	4.5684	0.010147	0.018335	0.820419	194	1	4.5684
CAP1	2	0.4214	0.69289	1	8106	1	-1.3874	0.01026	0.019165	0.820419	195	1	-1.3874
BMF	4	0.49005	0.85857	1	9105	2	-6.1156	0.010277	0.028899	0.820419	196	1	-6.1156
hsa-mir-6795	2	0.98122	0.98136	1	16676	0	1.9514	0.010382	0.019165	0.820419	197	1	1.9514
RBBP8	1	0.98957	0.98167	1	16810	0	4.3191	0.010425	0.018335	0.820419	198	1	4.3191
TST	2	0.95168	0.96321	1	16153	0	1.2408	0.010444	0.019165	0.820419	199	1	1.2408
CYB5D1	3	0.094656	0.40558	1	2414	1	-1.6698	0.010573	0.016724	0.820419	200	1	-1.6698
NEDD4	1	0.98942	0.98167	1	16808	0	4.0468	0.010579	0.018335	0.820419	201	1	4.0468
hsa-mir-377	1	0.9893	0.98167	1	16805	0	4.1742	0.010703	0.018335	0.820419	202	1	4.1742
PNMA2	2	0.86741	0.91692	1	14713	0	-0.21297	0.010751	0.019165	0.820419	203	1	-0.21297
GLMN	3	0.13716	0.50101	1	3364	2	-8.9579	0.010757	0.016724	0.820419	204	1	-8.9579
TTC23	2	0.90757	0.93364	1	15384	0	0.066899	0.010813	0.019165	0.820419	205	1	0.066899
ELTD1	1	0.98914	0.98167	1	16803	0	4.0888	0.010857	0.018335	0.820419	206	1	4.0888
CEPT1	2	0.9842	0.98404	1	16728	0	1.4527	0.010997	0.022914	0.820419	207	1	1.4527
KIFAP3	3	0.88649	0.95025	1	15047	0	-5.8613	0.011033	0.016724	0.820419	208	1	-5.8613
HDAC6	2	0.52034	0.75426	1	9492	1	-1.4056	0.011058	0.022914	0.820419	209	1	-1.4056
C10orf67	2	0.60198	0.78781	1	10600	1	-1.485	0.01112	0.022914	0.820419	210	1	-1.485
TRIM41	4	0.17856	0.61207	1	4232	3	-8.0008	0.011135	0.028899	0.820419	211	1	-8.0008
TMX1	2	0.77672	0.86873	1	13256	0	-0.87859	0.011243	0.022914	0.820419	212	1	-0.87859
HTR2A	1	0.98868	0.98167	1	16795	0	4.0443	0.011321	0.018335	0.820419	213	1	4.0443
MPHOSPH8	4	0.31377	0.78403	1	6586	2	-8.0907	0.01138	0.028899	0.820419	214	1	-8.0907
CCAR2	5	0.42312	0.87462	1	8129	3	-8.3478	0.011453	0.031974	0.820419	215	1	-8.3478
ACPL2	2	0.97151	0.97469	1	16494	0	0.35073	0.011488	0.022914	0.820419	216	1	0.35073
CLCN5	2	0.67297	0.81683	1	11659	1	-1.449	0.011673	0.022914	0.820419	217	1	-1.449
PPP1R3G	3	0.85321	0.93487	1	14516	1	-6.1224	0.011677	0.022053	0.820419	218	1	-6.1224
hsa-mir-302c	1	0.98828	0.98167	1	16787	0	3.9067	0.011722	0.018335	0.820419	219	1	3.9067
SPINK1	3	0.19085	0.59207	1	4463	1	-6.5273	0.011769	0.022053	0.820419	220	1	-6.5273
TRIM6-TRIM34	2	0.72366	0.8383	1	12412	1	-1.2413	0.011795	0.022914	0.820419	221	1	-1.2413
TRMT61B	2	0.7364	0.84899	1	12600	1	-0.54381	0.011857	0.022914	0.820419	222	1	-0.54381
hsa-mir-1180	1	0.98806	0.98166	1	16785	0	3.6478	0.011939	0.018335	0.820419	223	1	3.6478
IGSF3	1	0.98803	0.98166	1	16784	0	3.6774	0.011969	0.018335	0.820419	224	1	3.6774
HCFC2	2	0.79372	0.88181	1	13553	0	-0.96639	0.012103	0.022914	0.820419	225	1	-0.96639
ADCK2	2	0.98563	0.98507	1	16752	0	1.3351	0.012287	0.026713	0.820419	226	1	1.3351
VAMP5	5	0.26	0.76879	1	5821	3	-7.5741	0.012371	0.033671	0.820419	227	1	-7.5741
hsa-mir-484	1	0.9876	0.98166	1	16777	0	3.8675	0.012402	0.018335	0.820419	228	1	3.8675
hsa-mir-3692	2	0.40959	0.68375	1	7942	1	-1.8502	0.01241	0.026714	0.820419	229	1	-1.8502
TLE1	1	0.98757	0.98166	1	16776	0	3.8042	0.012433	0.018335	0.820419	230	1	3.8042
SMR3A	1	0.98747	0.98166	1	16774	0	3.7888	0.012525	0.018335	0.820419	231	1	3.7888
DDX25	3	0.66508	0.88768	1	11540	1	-7.5364	0.012596	0.022054	0.820419	232	1	-7.5364
SNX17	2	0.17487	0.47992	1	4154	1	-2.1794	0.012716	0.03059	0.820419	233	1	-2.1794
hsa-mir-4643	1	0.98713	0.98166	1	16770	0	3.1875	0.012865	0.018335	0.820419	234	1	3.1875
CAMTA2	2	0.77226	0.8673	1	13188	0	-1.3466	0.012901	0.03059	0.820419	235	1	-1.3466
RBM44	2	0.95848	0.96557	1	16271	0	-0.027952	0.012962	0.03059	0.820419	236	1	-0.027952
PPHLN1	1	0.98683	0.98166	1	16766	0	3.5034	0.013174	0.018335	0.820419	237	1	3.5034
TBCE	2	0.72586	0.83986	1	12442	1	-1.3997	0.013207	0.034444	0.820419	238	1	-1.3997
ANK3	2	0.99576	0.99301	1	16921	0	2.2332	0.01333	0.034444	0.820419	239	1	2.2332
XKR9	2	0.74713	0.85977	1	12780	1	-1.4214	0.013392	0.034444	0.820419	240	1	-1.4214
ATP4B	1	0.98658	0.98166	1	16764	0	3.4712	0.013421	0.018335	0.820419	241	1	3.4712
hsa-mir-6856	1	0.98646	0.98166	1	16762	0	3.3185	0.013545	0.018335	0.820419	242	1	3.3185
hsa-mir-4533	1	0.98642	0.98166	1	16761	0	3.9435	0.013576	0.018335	0.820419	243	1	3.9435
SOST	1	0.98633	0.98166	1	16760	0	3.3039	0.013668	0.018335	0.820419	244	1	3.3039
STK35	2	0.98162	0.98247	1	16683	0	0.50723	0.013698	0.034444	0.820419	245	1	0.50723
ARHGAP9	2	0.22471	0.53568	1	5162	1	-2.3207	0.01376	0.034444	0.820419	246	1	-2.3207
hsa-mir-5693	1	0.98621	0.98166	1	16757	0	3.7014	0.013792	0.018335	0.820419	247	1	3.7014
ZIC5	1	0.98612	0.98166	1	16756	0	3.7965	0.013885	0.018335	0.820419	248	1	3.7965
CCDC90B	1	0.98608	0.98166	1	16755	0	3.8061	0.013915	0.018335	0.820419	249	1	3.8061
ATP10A	2	0.99327	0.99043	1	16874	0	1.9283	0.013944	0.034444	0.820419	250	1	1.9283
MRPL49	1	0.98574	0.97965	1	16754	0	3.3129	0.014255	0.020346	0.820419	251	1	3.3129
CXCL17	2	0.71449	0.83675	1	12271	1	-0.96316	0.014373	0.034444	0.820419	252	1	-0.96316
EIF3J	1	0.98559	0.97762	1	16750	0	3.6739	0.01441	0.022383	0.820419	253	1	3.6739
GNS	2	0.89825	0.92938	1	15247	0	-0.71439	0.014434	0.034444	0.820419	254	1	-0.71439
hsa-mir-4450	1	0.98556	0.97762	1	16748	0	3.3401	0.014441	0.022383	0.820419	255	1	3.3401
HSD17B7	1	0.98553	0.97762	1	16747	0	3.4664	0.014471	0.022383	0.820419	256	1	3.4664
SLC37A2	2	0.76459	0.86427	1	13061	0	-1.4195	0.014496	0.034444	0.820419	257	1	-1.4195
RBM3	5	0.44232	0.88189	1	8411	3	-8.1342	0.01451	0.04104	0.820419	258	1	-8.1342
NYAP1	2	0.8638	0.91692	1	14664	0	-1.0993	0.014618	0.034444	0.820419	259	1	-1.0993
S100B	2	0.98423	0.98404	1	16729	0	0.88839	0.01468	0.034444	0.820419	260	1	0.88839
ALPK2	1	0.98525	0.97762	1	16744	0	3.4534	0.014749	0.022383	0.820419	261	1	3.4534
TUBB6	1	0.98522	0.97762	1	16743	0	3.2845	0.01478	0.022383	0.820419	262	1	3.2845
SNRNP200	3	0.96025	0.979	1	16294	0	-5.7894	0.014799	0.032616	0.820419	263	1	-5.7894
ABCF3	2	0.82452	0.89938	1	14055	0	-1.2481	0.014864	0.034444	0.820419	264	1	-1.2481
TMEM261	1	0.98507	0.97762	1	16741	0	3.0336	0.014935	0.022383	0.820419	265	1	3.0336
TECTB	3	0.24319	0.64714	1	5534	1	-6.8865	0.014983	0.032616	0.820419	266	1	-6.8865
KLHL38	2	0.85606	0.9145	1	14552	0	-1.2275	0.014986	0.034444	0.820419	267	1	-1.2275
ZNF582	2	0.91219	0.93673	1	15464	0	-0.49192	0.015048	0.034444	0.820419	268	1	-0.49192
KCNA10	1	0.98485	0.97762	1	16738	0	3.5507	0.015151	0.022383	0.820419	269	1	3.5507
SAR1B	3	0.24887	0.65297	1	5645	1	-4.6177	0.015166	0.032616	0.820419	270	1	-4.6177
STS	2	0.70634	0.83675	1	12156	1	-0.72718	0.015232	0.034444	0.820419	271	1	-0.72718
ZC3H10	1	0.98473	0.97762	1	16736	0	3.0175	0.015275	0.022383	0.820419	272	1	3.0175
SYTL4	2	0.99443	0.99235	1	16893	0	1.2139	0.015293	0.034444	0.820419	273	1	1.2139
TNFSF11	2	0.050468	0.20385	1	1390	1	-2.2478	0.015354	0.034444	0.820419	274	1	-2.2478
GHRHR	2	0.69417	0.82912	1	11968	1	-1.6981	0.015416	0.034444	0.820419	275	1	-1.6981
MARCO	1	0.98454	0.97762	1	16735	0	3.3558	0.01546	0.022383	0.820419	276	1	3.3558
ATP8B2	2	0.81918	0.89676	1	13961	0	-1.0728	0.015477	0.034444	0.820419	277	1	-1.0728
DOCK4	2	0.6033	0.78932	1	10622	1	-1.8076	0.015538	0.034444	0.820419	278	1	-1.8076
DRAM2	1	0.98439	0.97762	1	16731	0	3.3581	0.015614	0.022383	0.820419	279	1	3.3581
CERS4	2	0.50089	0.74347	1	9245	1	-2.0917	0.015661	0.034444	0.820419	280	1	-2.0917
THOP1	2	0.9971	0.99459	1	16944	0	2.193	0.015722	0.034444	0.820419	281	1	2.193
hsa-mir-1287	1	0.98426	0.97762	1	16730	0	2.9522	0.015738	0.022383	0.820419	282	1	2.9522
GRM7	4	0.58585	0.89743	1	10372	2	-4.8881	0.015783	0.035667	0.820419	283	1	-4.8881
hsa-mir-1266	2	0.49186	0.73721	1	9130	1	-2.0628	0.015783	0.034444	0.820419	284	1	-2.0628
HMGXB3	1	0.98417	0.97559	1	16727	0	3.0682	0.015831	0.024414	0.820419	285	1	3.0682
TUBB	2	0.067368	0.25273	1	1790	1	-2.7109	0.015845	0.034444	0.820419	286	1	-2.7109
TCF3	1	0.98411	0.97559	1	16726	0	3.0332	0.015892	0.024414	0.820419	287	1	3.0332
ERAP1	3	0.96383	0.98034	1	16353	0	-2.7422	0.0159	0.032617	0.820419	288	1	-2.7422
hsa-mir-6786	1	0.98408	0.97559	1	16725	0	3.5756	0.015923	0.024414	0.820419	289	1	3.5756
PIK3C3	1	0.98405	0.97559	1	16724	0	3.8322	0.015954	0.024414	0.820419	290	1	3.8322
CCDC150	1	0.98398	0.97559	1	16722	0	3.1671	0.016016	0.024414	0.820419	291	1	3.1671
SYT11	2	0.022452	0.11303	1	639	1	-3.151	0.016028	0.034444	0.820419	292	1	-3.151
ZRANB1	1	0.98389	0.97559	1	16719	0	2.8407	0.016109	0.024414	0.820419	293	1	2.8407
MAP2K3	2	0.73754	0.85211	1	12614	1	-1.5105	0.016396	0.034444	0.820419	294	1	-1.5105
hsa-mir-5685	1	0.9834	0.97356	1	16714	0	3.0109	0.016603	0.026436	0.820419	295	1	3.0109
hsa-mir-4750	1	0.98337	0.97356	1	16713	0	3.3301	0.016634	0.026436	0.820419	296	1	3.3301
GLYCTK	1	0.98312	0.97356	1	16710	0	2.7034	0.016881	0.026436	0.820419	297	1	2.7034
VASN	4	0.31493	0.78494	1	6598	2	-6.1814	0.016881	0.035667	0.820419	298	1	-6.1814
hsa-mir-431	3	0.98223	0.9876	1	16693	0	-1.5305	0.016908	0.037965	0.820419	299	1	-1.5305
ATXN7L3	1	0.98303	0.97356	1	16708	0	3.1715	0.016973	0.026436	0.820419	300	1	3.1715
TCF7	3	0.6623	0.88682	1	11502	1	-4.5011	0.017	0.037965	0.820419	301	1	-4.5011
ENO2	1	0.98296	0.97356	1	16707	0	2.6546	0.017035	0.026436	0.820419	302	1	2.6546
SLC35D1	1	0.98278	0.97356	1	16705	0	2.902	0.017221	0.026436	0.820419	303	1	2.902
hsa-mir-4300	1	0.98275	0.97356	1	16704	0	3.1362	0.017251	0.026436	0.820419	304	1	3.1362
RNF32	2	0.99372	0.99086	1	16880	0	1.6911	0.017254	0.034444	0.820419	305	1	1.6911
HTR3D	3	0.4129	0.76979	1	7991	2	-8.2686	0.017275	0.037965	0.820419	306	1	-8.2686
YIPF1	1	0.98266	0.97356	1	16702	0	2.8762	0.017344	0.026436	0.820419	307	1	2.8762
ZMYM6NB	3	0.41099	0.7666	1	7965	2	-8.3313	0.017366	0.037965	0.820419	308	1	-8.3313
DEFB130	1	0.98241	0.97155	1	16697	0	2.8136	0.017591	0.02845	0.820419	309	1	2.8136
TGIF2-C20orf24	1	0.98232	0.97155	1	16695	0	2.5437	0.017684	0.02845	0.820419	310	1	2.5437
LGI4	2	0.78859	0.8804	1	13464	0	-1.4974	0.017744	0.034444	0.820419	311	1	-1.4974
WIZ	3	0.26348	0.663	1	5880	1	-3.7177	0.017916	0.037965	0.820419	312	1	-3.7177
SAMD8	4	0.56189	0.88739	1	10070	2	-6.1527	0.017978	0.035667	0.820419	313	1	-6.1527
APOM	1	0.98198	0.97155	1	16691	0	2.7052	0.018024	0.02845	0.820419	314	1	2.7052
KIAA0141	2	0.89796	0.92938	1	15240	0	-0.61074	0.01805	0.034444	0.820419	315	1	-0.61074
NKTR	1	0.98195	0.97155	1	16690	0	2.817	0.018055	0.02845	0.820419	316	1	2.817
ALAS1	2	0.49173	0.73721	1	9128	1	-2.1688	0.018111	0.034444	0.820419	317	1	-2.1688
HR	1	0.98182	0.97155	1	16689	0	2.4913	0.018178	0.02845	0.820419	318	1	2.4913
VDAC2	1	0.98176	0.97155	1	16688	0	2.5289	0.01824	0.02845	0.820419	319	1	2.5289
NBEAL2	2	0.99512	0.99301	1	16908	0	1.8475	0.018294	0.034444	0.820419	320	1	1.8475
TCEB3	1	0.98164	0.97155	1	16685	0	2.8814	0.018364	0.02845	0.820419	321	1	2.8814
ICT1	1	0.98161	0.97155	1	16682	0	2.6723	0.018394	0.02845	0.820419	322	1	2.6723
POLDIP2	2	0.78376	0.87461	1	13374	0	-1.753	0.018417	0.034444	0.820419	323	1	-1.753
FARSA	1	0.98148	0.97155	1	16680	0	3.27	0.018518	0.02845	0.820419	324	1	3.27
GLIS2	1	0.98145	0.97155	1	16679	0	2.6783	0.018549	0.02845	0.820419	325	1	2.6783
REG1B	1	0.98117	0.97155	1	16674	0	2.6275	0.018827	0.02845	0.820419	326	1	2.6275
CMTM2	3	0.94293	0.97455	1	15985	0	-7.0045	0.018831	0.048789	0.820419	327	1	-7.0045
PIAS2	2	0.71719	0.83675	1	12307	1	-1.7386	0.018845	0.034444	0.820419	328	1	-1.7386
hsa-mir-639	1	0.98111	0.97155	1	16673	0	2.3441	0.018889	0.02845	0.820419	329	1	2.3441
KRT82	1	0.98108	0.97155	1	16671	0	2.6906	0.01892	0.02845	0.820419	330	1	2.6906
CTNNBL1	1	0.98099	0.97155	1	16669	0	2.8664	0.019012	0.02845	0.820419	331	1	2.8664
SPAG1	1	0.98096	0.97155	1	16668	0	2.8861	0.019043	0.02845	0.820419	332	1	2.8861
TESK1	1	0.98083	0.97155	1	16666	0	3.0739	0.019167	0.028451	0.820419	333	1	3.0739
ABCB9	1	0.98059	0.97155	1	16662	0	2.6443	0.019414	0.028451	0.820419	334	1	2.6443
OR10H2	4	0.34238	0.79829	1	6975	1	-1.6218	0.01944	0.04915	0.820419	335	1	-1.6218
IFNA21	2	0.93812	0.95133	1	15903	0	-0.87272	0.019518	0.03821	0.820419	336	1	-0.87272
EFCAB4A	1	0.98043	0.97155	1	16657	0	2.9869	0.019568	0.028451	0.820419	337	1	2.9869
PBOV1	1	0.98037	0.97155	1	16655	0	2.3477	0.01963	0.028451	0.820419	338	1	2.3477
ACOT13	2	0.19428	0.49977	1	4545	1	-2.787	0.019641	0.03821	0.820419	339	1	-2.787
KRTAP3-3	1	0.98031	0.97155	1	16653	0	2.6123	0.019692	0.028451	0.820419	340	1	2.6123
PRKG1	2	0.18967	0.49648	1	4441	1	-2.752	0.019702	0.03821	0.820419	341	1	-2.752
OR6K3	1	0.98025	0.97155	1	16651	0	2.3589	0.019754	0.028451	0.820419	342	1	2.3589
PTBP3	1	0.98012	0.97155	1	16650	0	2.6099	0.019877	0.028451	0.820419	343	1	2.6099
hsa-mir-548as	1	0.98006	0.97155	1	16645	0	2.2327	0.019939	0.028451	0.820419	344	1	2.2327
C15orf40	1	0.98	0.97155	1	16644	0	3.2522	0.020001	0.028451	0.820419	345	1	3.2522
LAIR1	2	0.43968	0.70051	1	8370	1	-2.6338	0.020069	0.03821	0.820419	346	1	-2.6338
NABP1	1	0.97988	0.97155	1	16643	0	2.4975	0.020124	0.028451	0.820419	347	1	2.4975
SERPINH1	1	0.97978	0.97155	1	16642	0	2.438	0.020217	0.028451	0.820419	348	1	2.438
ZPBP	2	0.13426	0.42432	1	3305	1	-3.0158	0.020375	0.03821	0.820419	349	1	-3.0158
hsa-mir-6766	1	0.9796	0.97155	1	16639	0	2.7081	0.020402	0.028451	0.820419	350	1	2.7081
FAM200A	1	0.97957	0.97155	1	16638	0	2.5561	0.020433	0.028451	0.820419	351	1	2.5561
ADAMTS3	2	0.89212	0.92723	1	15136	0	-1.3977	0.020436	0.03821	0.820419	352	1	-1.3977
hsa-mir-135a-2	1	0.97954	0.97155	1	16636	0	2.3806	0.020464	0.028451	0.820419	353	1	2.3806
PROM1	2	0.87833	0.9239	1	14913	0	-0.42269	0.020558	0.03821	0.820419	354	1	-0.42269
hsa-mir-4276	2	0.91908	0.93775	1	15580	0	-0.47888	0.020619	0.03821	0.820419	355	1	-0.47888
ANKAR	3	0.59332	0.86179	1	10482	1	-6.2227	0.02066	0.054202	0.820419	356	1	-6.2227
CEP152	2	0.81343	0.89409	1	13869	0	-1.6904	0.02068	0.03821	0.820419	357	1	-1.6904
CD1E	3	0.22081	0.62641	1	5074	1	-4.9305	0.020751	0.054202	0.820419	358	1	-4.9305
ADRB1	1	0.9792	0.97155	1	16631	0	2.375	0.020804	0.028451	0.820419	359	1	2.375
ABCA6	4	0.1518	0.57435	1	3665	3	-8.0818	0.0209	0.04915	0.820419	360	1	-8.0818
PCDHGB1	1	0.97907	0.96955	1	16629	0	2.3457	0.020927	0.030454	0.820419	361	1	2.3457
NUTF2	1	0.97904	0.96955	1	16628	0	2.2544	0.020958	0.030454	0.820419	362	1	2.2544
NKX2-1	3	0.28932	0.68861	1	6238	1	-5.2576	0.021025	0.054202	0.820419	363	1	-5.2576
CX3CR1	2	0.32847	0.62085	1	6770	1	-2.6918	0.021108	0.03821	0.820419	364	1	-2.6918
hsa-mir-500b	2	0.43444	0.69898	1	8298	1	-2.5146	0.021169	0.03821	0.820419	365	1	-2.5146
OSTC	3	0.96136	0.97946	1	16310	0	-4.6382	0.021208	0.054202	0.820419	366	1	-4.6382
VSNL1	2	0.83371	0.9046	1	14204	0	-0.64598	0.02123	0.03821	0.820419	367	1	-0.64598
GALNT10	3	0.70396	0.89539	1	12120	1	-7.8464	0.021391	0.054202	0.820419	368	1	-7.8464
PARP6	2	0.38315	0.66224	1	7550	1	-2.6636	0.021475	0.03821	0.820419	369	1	-2.6636
PI4K2A	1	0.97849	0.96955	1	16621	0	2.3826	0.021514	0.030454	0.820419	370	1	2.3826
LGALS13	2	0.71597	0.83675	1	12288	1	-2.0967	0.021536	0.03821	0.820419	371	1	-2.0967
FKBP15	3	0.81609	0.92543	1	13907	1	-3.0854	0.021756	0.054202	0.820419	372	1	-3.0854
MTG1	2	0.48833	0.73566	1	9078	1	-2.6134	0.021841	0.03821	0.820419	373	1	-2.6134
IGSF11	2	0.93884	0.9522	1	15919	0	-0.45972	0.021903	0.03821	0.820419	374	1	-0.45972
MYLK2	1	0.97808	0.96955	1	16614	0	2.5092	0.021916	0.030455	0.820419	375	1	2.5092
TRAF1	2	0.90929	0.93468	1	15410	0	-1.4825	0.022025	0.03821	0.820419	376	1	-1.4825
UNC93A	3	0.20185	0.61179	1	4702	2	-8.9631	0.02203	0.054202	0.820419	377	1	-8.9631
CENPL	1	0.97784	0.96955	1	16610	0	2.163	0.022163	0.030455	0.820419	378	1	2.163
FSD2	3	0.33219	0.71926	1	6829	1	-5.1256	0.022304	0.054202	0.820419	379	1	-5.1256
PROS1	2	0.78964	0.8804	1	13484	0	-1.8528	0.022391	0.03821	0.820419	380	1	-1.8528
LYSMD3	1	0.97747	0.96751	1	16605	0	2.6042	0.022534	0.032488	0.820419	381	1	2.6042
ZBBX	2	0.64836	0.81074	1	11295	1	-2.1826	0.022575	0.03821	0.820419	382	1	-2.1826
PPAP2C	3	0.92291	0.96633	1	15645	0	-5.9651	0.022578	0.054202	0.820419	383	1	-5.9651
TMEM204	2	0.94402	0.95658	1	16010	0	-0.10197	0.022758	0.03821	0.820419	384	1	-0.10197
ACAN	1	0.97706	0.96548	1	16600	0	2.175	0.022935	0.034524	0.820419	385	1	2.175
LRRC15	2	0.27773	0.58548	1	6075	1	-2.8352	0.022941	0.03821	0.820419	386	1	-2.8352
IRX3	1	0.977	0.96548	1	16599	0	1.9148	0.022997	0.034524	0.820419	387	1	1.9148
OR9I1	2	0.96131	0.9663	1	16308	0	-0.44362	0.023002	0.03821	0.820419	388	1	-0.44362
OR2G2	2	0.98754	0.98649	1	16775	0	0.45918	0.023063	0.03821	0.820419	389	1	0.45918
GLI3	1	0.97691	0.96548	1	16598	0	2.159	0.02309	0.034524	0.820419	390	1	2.159
TET1	1	0.97688	0.96548	1	16597	0	2.0671	0.02312	0.034524	0.820419	391	1	2.0671
hsa-mir-4667	1	0.97666	0.96548	1	16593	0	2.2871	0.023337	0.034524	0.820419	392	1	2.2871
TMEM194B	2	0.95083	0.96321	1	16138	0	-1.0917	0.023429	0.03821	0.820419	393	1	-1.0917
GPX3	2	0.19672	0.50131	1	4603	1	-3.1811	0.02349	0.03821	0.820419	394	1	-3.1811
hsa-mir-6761	2	0.99738	0.99491	1	16950	0	1.787	0.023552	0.03821	0.820419	395	1	1.787
DNASE1L1	2	0.56425	0.77104	1	10106	1	-2.6174	0.023613	0.038211	0.820419	396	1	-2.6174
WIPF2	1	0.97629	0.96548	1	16588	0	1.9907	0.023707	0.034524	0.820419	397	1	1.9907
GPR135	1	0.97623	0.96548	1	16587	0	2.1721	0.023769	0.034524	0.820419	398	1	2.1721
MED23	1	0.9762	0.96548	1	16585	0	1.9179	0.0238	0.034524	0.820419	399	1	1.9179
RHBDL2	3	0.82108	0.92801	1	13990	1	-4.0209	0.023855	0.054202	0.820419	400	1	-4.0209
LY75-CD302	2	0.90634	0.93364	1	15366	0	-1.4017	0.023857	0.038211	0.820419	401	1	-1.4017
KRT78	1	0.97611	0.96548	1	16584	0	1.989	0.023893	0.034524	0.820419	402	1	1.989
RBM12B	2	0.97385	0.97532	1	16544	0	-0.11716	0.023918	0.038211	0.820419	403	1	-0.11716
PITRM1	1	0.97601	0.96548	1	16583	0	1.8466	0.023985	0.034524	0.820419	404	1	1.8466
DACT1	2	0.98009	0.98023	1	16648	0	-0.4822	0.02404	0.038211	0.820419	405	1	-0.4822
HMGXB4	2	0.70862	0.83675	1	12182	1	-2.2055	0.024284	0.038211	0.820419	406	1	-2.2055
ADAM17	3	0.86176	0.93999	1	14641	1	-7.0022	0.024402	0.054203	0.820419	407	1	-7.0022
FBXO9	2	0.17924	0.48521	1	4242	1	-3.2734	0.024406	0.038211	0.820419	408	1	-3.2734
SEC14L4	1	0.97558	0.96548	1	16576	0	1.8417	0.024418	0.034524	0.820419	409	1	1.8417
UTP23	1	0.97546	0.96548	1	16574	0	2.2768	0.024541	0.034524	0.820419	410	1	2.2768
FUT7	1	0.97543	0.96548	1	16573	0	1.9506	0.024572	0.034524	0.820419	411	1	1.9506
TXNDC5	3	0.75839	0.90994	1	12960	1	-5.4013	0.024584	0.054203	0.820419	412	1	-5.4013
HPCAL1	2	0.81319	0.89409	1	13864	0	-1.8337	0.024589	0.038211	0.820419	413	1	-1.8337
MVB12A	1	0.97537	0.96548	1	16572	0	1.8254	0.024634	0.034524	0.820419	414	1	1.8254
SMG9	3	0.68328	0.89195	1	11807	1	-4.5219	0.024675	0.054203	0.820419	415	1	-4.5219
LYG1	1	0.97524	0.96548	1	16569	0	1.8475	0.024758	0.034525	0.820419	416	1	1.8475
HLA-DQB2	2	0.11513	0.37974	1	2864	1	-3.3831	0.024833	0.038211	0.820419	417	1	-3.3831
CD300LD	3	0.25487	0.65876	1	5746	2	-5.982	0.024858	0.054203	0.820419	418	1	-5.982
CD74	4	0.49851	0.86095	1	9207	1	-6.3335	0.024908	0.069206	0.820419	419	1	-6.3335
NFIX	1	0.975	0.96548	1	16566	0	1.9484	0.025005	0.034525	0.820419	420	1	1.9484
PAPLN	1	0.97496	0.96548	1	16565	0	1.9951	0.025036	0.034525	0.820419	421	1	1.9951
C10orf35	3	0.98543	0.98943	1	16746	0	-3.4582	0.02504	0.054203	0.820419	422	1	-3.4582
OR11A1	2	0.87766	0.9239	1	14897	0	-1.7485	0.025077	0.038211	0.820419	423	1	-1.7485
GPR143	3	0.022522	0.19095	1	642	2	-9.9892	0.025131	0.054203	0.820419	424	1	-9.9892
OR4N2	4	0.42318	0.8351	1	8132	2	-5.3479	0.02515	0.069206	0.820419	425	1	-5.3479
WSCD2	3	0.50063	0.83027	1	9239	1	-7.3639	0.025222	0.054203	0.820419	426	1	-7.3639
GPR182	2	0.92942	0.9457	1	15750	0	-1.5799	0.02526	0.038211	0.820419	427	1	-1.5799
WDR19	3	0.49624	0.82943	1	9184	1	-6.0603	0.025313	0.054203	0.820419	428	1	-6.0603
IFIT2	2	0.63198	0.80315	1	11061	1	-2.3177	0.025321	0.038211	0.820419	429	1	-2.3177
RSPH1	1	0.97466	0.96548	1	16559	0	2.0139	0.025344	0.034525	0.820419	430	1	2.0139
HIGD1C	2	0.43583	0.70051	1	8313	1	-2.5738	0.025382	0.038211	0.820419	431	1	-2.5738
ASB14	3	0.062986	0.32243	1	1689	2	-8.7522	0.025404	0.054203	0.820419	432	1	-8.7522
THAP9	3	0.83849	0.93402	1	14274	1	-5.0223	0.025495	0.054203	0.820419	433	1	-5.0223
VPS41	2	0.83311	0.9046	1	14191	0	-1.9249	0.025504	0.038211	0.820419	434	1	-1.9249
GDF10	1	0.97444	0.96548	1	16553	0	2.5977	0.025561	0.034525	0.820419	435	1	2.5977
CDCA3	3	0.11755	0.46278	1	2925	2	-9.3163	0.025586	0.054203	0.820419	436	1	-9.3163
B4GALNT4	3	0.46566	0.80254	1	8743	1	-5.1486	0.025677	0.054203	0.820419	437	1	-5.1486
CEP19	1	0.97425	0.96548	1	16549	0	2.1801	0.025746	0.034525	0.820419	438	1	2.1801
NARS2	2	0.76657	0.86576	1	13104	0	-1.6325	0.025748	0.038211	0.820419	439	1	-1.6325
PDHA1	2	0.8794	0.9239	1	14930	0	-1.3473	0.025809	0.038211	0.820419	440	1	-1.3473
ASS1	1	0.97413	0.96548	1	16548	0	2.139	0.02587	0.034525	0.820419	441	1	2.139
NUDT10	2	0.8924	0.92723	1	15144	0	-1.8436	0.02587	0.038211	0.820419	442	1	-1.8436
ADCK1	1	0.9741	0.96548	1	16546	0	1.6619	0.0259	0.034525	0.820419	443	1	1.6619
KRTAP5-9	1	0.97407	0.96548	1	16545	0	1.9686	0.025931	0.034525	0.820419	444	1	1.9686
CASP7	3	0.6454	0.88242	1	11250	1	-7.0743	0.025951	0.054203	0.820419	445	1	-7.0743
ZC3H11A	3	0.61573	0.8712	1	10811	1	-4.6793	0.026042	0.054203	0.820419	446	1	-4.6793
RBM20	2	0.8191	0.89676	1	13957	0	-1.9596	0.026053	0.038211	0.820419	447	1	-1.9596
ZNF672	2	0.9903	0.98788	1	16822	0	0.71187	0.026236	0.038211	0.820419	448	1	0.71187
hsa-mir-6885	1	0.97376	0.96548	1	16540	0	1.7194	0.02624	0.034525	0.820419	449	1	1.7194
BRK1	1	0.97373	0.96548	1	16539	0	1.9407	0.026271	0.034525	0.820419	450	1	1.9407
CELA3A	3	0.85234	0.93487	1	14497	1	-2.2365	0.026315	0.054203	0.820419	451	1	-2.2365
GIPC1	1	0.97357	0.96548	1	16535	0	1.6455	0.026426	0.034525	0.820419	452	1	1.6455
RBFOX1	3	0.53163	0.84218	1	9640	1	-7.9308	0.026588	0.054203	0.820419	453	1	-7.9308
PRKAA2	2	0.43926	0.70051	1	8363	1	-2.7778	0.026601	0.038211	0.820419	454	1	-2.7778
ZCCHC14	1	0.97333	0.96548	1	16531	0	1.6196	0.026673	0.034525	0.820419	455	1	1.6196
MAD2L1BP	2	0.9888	0.98697	1	16798	0	0.41652	0.026784	0.038211	0.820419	456	1	0.41652
UBXN11	1	0.9732	0.96353	1	16529	0	1.8188	0.026796	0.036473	0.820419	457	1	1.8188
HRH2	2	0.94411	0.95658	1	16011	0	-1.5144	0.026845	0.038211	0.820419	458	1	-1.5144
RAB11FIP5	1	0.97311	0.96151	1	16528	0	2.0566	0.026889	0.038485	0.820419	459	1	2.0566
GRAMD3	2	0.69927	0.82912	1	12041	1	-2.5195	0.027028	0.038211	0.820419	460	1	-2.5195
APOBEC3F	1	0.97293	0.96151	1	16525	0	1.9488	0.027074	0.038485	0.820419	461	1	1.9488
CYP46A1	4	0.2501	0.72685	1	5666	2	-7.2279	0.027088	0.075854	0.820419	462	1	-7.2279
hsa-mir-610	2	0.15454	0.44937	1	3720	1	-3.4036	0.027089	0.038211	0.820419	463	1	-3.4036
hsa-mir-6500	1	0.97289	0.96151	1	16523	0	1.7134	0.027105	0.038485	0.820419	464	1	1.7134
MFSD5	3	0.93383	0.97121	1	15827	0	-1.9316	0.027134	0.054203	0.820419	465	1	-1.9316
GOLT1A	1	0.97286	0.96151	1	16522	0	1.9206	0.027136	0.038485	0.820419	466	1	1.9206
ACPP	1	0.9728	0.96151	1	16521	0	1.5399	0.027198	0.038485	0.820419	467	1	1.5399
TUSC5	2	0.2397	0.5623	1	5464	1	-3.0819	0.027333	0.038211	0.820419	468	1	-3.0819
LOXL2	2	0.15028	0.44625	1	3629	1	-3.2193	0.027455	0.038211	0.820419	469	1	-3.2193
SP4	1	0.97249	0.96151	1	16518	0	1.6565	0.027507	0.038485	0.820419	470	1	1.6565
JAK2	2	0.82592	0.89938	1	14073	0	-2.1859	0.027515	0.038211	0.820419	471	1	-2.1859
hsa-mir-6731	1	0.97243	0.96151	1	16516	0	2.0901	0.027568	0.038485	0.820419	472	1	2.0901
SPATA9	3	0.10688	0.43725	1	2680	2	-9.3667	0.02768	0.054203	0.820419	473	1	-9.3667
TAT	2	0.94461	0.95658	1	16019	0	-1.5867	0.027759	0.038211	0.820419	474	1	-1.5867
OXCT1	1	0.97218	0.96151	1	16512	0	1.8998	0.027816	0.038485	0.820419	475	1	1.8998
TCP1	1	0.97212	0.96151	1	16511	0	1.9084	0.027877	0.038485	0.820419	476	1	1.9084
ZACN	2	0.56868	0.77412	1	10168	1	-2.7022	0.027881	0.038211	0.820419	477	1	-2.7022
TMEM106B	1	0.97206	0.96151	1	16510	0	1.8008	0.027939	0.038485	0.820419	478	1	1.8008
GUSB	2	0.71224	0.83675	1	12230	1	-2.4367	0.028003	0.041999	0.820419	479	1	-2.4367
C14orf182	1	0.97197	0.96151	1	16509	0	1.5661	0.028032	0.038485	0.820419	480	1	1.5661
DHRS9	1	0.97188	0.96151	1	16506	0	1.6861	0.028124	0.038485	0.820419	481	1	1.6861
KRTAP4-2	2	0.22368	0.53568	1	5142	1	-3.0764	0.028125	0.041999	0.820419	482	1	-3.0764
PPFIA3	2	0.23636	0.55763	1	5393	1	-3.1996	0.028186	0.041999	0.820419	483	1	-3.1996
C2orf47	1	0.97175	0.96151	1	16502	0	1.6572	0.028248	0.038485	0.820419	484	1	1.6572
CNPY1	3	0.33743	0.72625	1	6903	2	-8.5155	0.028316	0.054203	0.820419	485	1	-8.5155
TIMP3	2	0.30472	0.60552	1	6454	1	-3.1747	0.028368	0.042	0.820419	486	1	-3.1747
RPP25L	1	0.97163	0.96151	1	16499	0	1.4969	0.028372	0.038485	0.820419	487	1	1.4969
E2F4	3	0.67293	0.89025	1	11657	1	-7.6285	0.028407	0.054203	0.820419	488	1	-7.6285
NTSR2	2	0.11146	0.36894	1	2775	1	-3.4963	0.028429	0.042	0.820419	489	1	-3.4963
MFAP5	1	0.97157	0.96151	1	16496	0	1.6214	0.028433	0.038485	0.820419	490	1	1.6214
hsa-mir-8084	2	0.67818	0.82148	1	11735	1	-2.2174	0.028551	0.045792	0.820419	491	1	-2.2174
UBTD2	3	0.9093	0.96017	1	15411	0	-2.2327	0.028589	0.054203	0.820419	492	1	-2.2327
GPRC5C	1	0.97135	0.96151	1	16491	0	1.5185	0.02865	0.038486	0.820419	493	1	1.5185
C11orf48	1	0.97117	0.96151	1	16490	0	1.7101	0.028835	0.038486	0.820419	494	1	1.7101
DAD1	2	0.96825	0.97202	1	16439	0	-1.2759	0.028855	0.045792	0.820419	495	1	-1.2759
ANKRD32	3	0.90408	0.95877	1	15332	0	-4.5564	0.028862	0.059547	0.820419	496	1	-4.5564
PATL1	1	0.97107	0.96151	1	16489	0	1.5014	0.028928	0.038486	0.820419	497	1	1.5014
AMT	3	0.62597	0.87464	1	10969	1	-4.7347	0.028952	0.059547	0.820419	498	1	-4.7347
CLEC14A	2	0.8141	0.89409	1	13876	0	-1.7497	0.029038	0.045792	0.820419	499	1	-1.7497
DCAF10	1	0.97092	0.96151	1	16486	0	1.3085	0.029082	0.038486	0.820419	500	1	1.3085
C14orf166B	2	0.99024	0.98788	1	16819	0	0.30152	0.029099	0.045792	0.820419	501	1	0.30152
ZFR2	3	0.56288	0.85401	1	10089	1	-4.2728	0.029225	0.059547	0.820419	502	1	-4.2728
HERC5	2	0.19439	0.49977	1	4549	1	-3.2713	0.029403	0.045792	0.820419	503	1	-3.2713
PAPOLA	2	0.63007	0.80315	1	11030	1	-2.5255	0.029464	0.045792	0.820419	504	1	-2.5255
LIN7C	1	0.97052	0.96151	1	16482	0	1.6338	0.029484	0.038486	0.820419	505	1	1.6338
CCNB2	2	0.094845	0.3255	1	2420	1	-3.4294	0.029586	0.045792	0.820419	506	1	-3.4294
ZNF266	3	0.10114	0.41776	1	2557	2	-8.2118	0.029679	0.059547	0.820419	507	1	-8.2118
CAB39	2	0.99641	0.99398	1	16933	0	1.2179	0.029768	0.045792	0.820419	508	1	1.2179
ZNF610	2	0.23712	0.55917	1	5405	1	-3.4008	0.02989	0.045792	0.820419	509	1	-3.4008
hsa-mir-8067	2	0.34077	0.63	1	6948	1	-2.9586	0.029951	0.045792	0.820419	510	1	-2.9586
UBA2	1	0.97002	0.96151	1	16478	0	1.9854	0.029978	0.038486	0.820419	511	1	1.9854
COL6A3	1	0.96999	0.96151	1	16477	0	1.3653	0.030009	0.038486	0.820419	512	1	1.3653
hsa-mir-3184	1	0.9699	0.96151	1	16475	0	1.4117	0.030101	0.038486	0.820419	513	1	1.4117
GABRQ	4	0.98233	0.99306	1	16696	0	-4.9527	0.03011	0.075854	0.820419	514	1	-4.9527
PIM2	1	0.96984	0.96151	1	16473	0	1.289	0.030163	0.038486	0.820419	515	1	1.289
ODF3L2	2	0.96284	0.9663	1	16330	0	-0.052924	0.030194	0.045792	0.820419	516	1	-0.052924
hsa-mir-1285-1	3	0.25278	0.65588	1	5714	2	-8.7882	0.030224	0.059547	0.820419	517	1	-8.7882
TMED8	1	0.96965	0.95948	1	16470	0	1.359	0.030348	0.04052	0.820419	518	1	1.359
INCA1	2	0.48789	0.73566	1	9072	1	-2.9794	0.030377	0.045792	0.820419	519	1	-2.9794
RAB13	2	0.0099523	0.070817	1	289	1	-3.9949	0.030438	0.045792	0.820419	520	1	-3.9949
DNAJC30	1	0.96947	0.95948	1	16464	0	1.3423	0.030534	0.04052	0.820419	521	1	1.3423
TEPP	1	0.96944	0.95948	1	16463	0	1.4146	0.030565	0.04052	0.820419	522	1	1.4146
KLHL26	3	0.98077	0.98693	1	16664	0	-4.8857	0.030587	0.059547	0.820419	523	1	-4.8857
TIMM8A	1	0.96934	0.95948	1	16460	0	1.4181	0.030657	0.04052	0.820419	524	1	1.4181
LRP1	1	0.96931	0.95948	1	16459	0	1.3943	0.030688	0.04052	0.820419	525	1	1.3943
CPNE4	2	0.64229	0.80621	1	11197	1	-2.7623	0.030742	0.045792	0.820419	526	1	-2.7623
TMPRSS6	1	0.96925	0.95948	1	16457	0	1.3859	0.03075	0.04052	0.820419	527	1	1.3859
CCDC135	1	0.96919	0.95948	1	16454	0	1.3473	0.030812	0.04052	0.820419	528	1	1.3473
OR4F17	2	0.8291	0.89938	1	14128	0	-1.2672	0.030863	0.045792	0.820419	529	1	-1.2672
ARNT	1	0.9691	0.95948	1	16452	0	1.4222	0.030904	0.04052	0.820419	530	1	1.4222
FLG	3	0.48839	0.8216	1	9080	2	-8.0235	0.031041	0.059547	0.820419	531	1	-8.0235
TNFAIP6	2	0.45337	0.70812	1	8573	1	-2.8618	0.031046	0.045792	0.820419	532	1	-2.8618
COQ7	1	0.96888	0.95948	1	16449	0	1.5484	0.031121	0.04052	0.820419	533	1	1.5484
CCR6	2	0.059896	0.23318	1	1609	1	-3.7759	0.031167	0.045792	0.820419	534	1	-3.7759
SH3BGRL3	1	0.96872	0.95948	1	16448	0	1.4101	0.031275	0.04052	0.820419	535	1	1.4101
OR52N4	3	0.8212	0.92801	1	13991	1	-6.5517	0.031313	0.059547	0.820419	536	1	-6.5517
SFTPD	2	0.90251	0.93152	1	15312	0	-1.1191	0.03135	0.049634	0.820419	537	1	-1.1191
RANBP3	1	0.96857	0.95948	1	16446	0	1.2158	0.03143	0.04052	0.820419	538	1	1.2158
HTATIP2	1	0.96848	0.95948	1	16445	0	1.2798	0.031522	0.040521	0.820419	539	1	1.2798
DHRS13	1	0.96845	0.95948	1	16444	0	1.1606	0.031553	0.040521	0.820419	540	1	1.1606
DUSP8	1	0.96842	0.95948	1	16443	0	1.2942	0.031584	0.040521	0.820419	541	1	1.2942
FCAMR	1	0.96835	0.95948	1	16441	0	1.1308	0.031646	0.040521	0.820419	542	1	1.1308
COPS7B	1	0.96832	0.95948	1	16440	0	1.1822	0.031677	0.040521	0.820419	543	1	1.1822
LRRC37A	1	0.96817	0.95948	1	16437	0	1.2951	0.031831	0.040521	0.820419	544	1	1.2951
GSDMC	3	0.96358	0.98034	1	16347	0	-0.5189	0.031857	0.059547	0.820419	545	1	-0.5189
LRRC23	3	0.064671	0.32785	1	1742	1	-7.373	0.031948	0.059547	0.820419	546	1	-7.373
PEX26	1	0.96801	0.95948	1	16435	0	1.3435	0.031986	0.040521	0.820419	547	1	1.3435
hsa-mir-3135a	1	0.96798	0.95948	1	16434	0	1.2829	0.032016	0.040521	0.820419	548	1	1.2829
MECR	2	0.46038	0.71423	1	8668	1	-3.1444	0.032019	0.049635	0.820419	549	1	-3.1444
OR52D1	4	0.19717	0.64729	1	4617	2	-5.992	0.032041	0.075854	0.820419	550	1	-5.992
hsa-mir-450a-2	1	0.96795	0.95948	1	16433	0	1.3078	0.032047	0.040521	0.820419	551	1	1.3078
PMEPA1	2	0.93973	0.9522	1	15934	0	-1.2289	0.032079	0.049635	0.820419	552	1	-1.2289
PTGS1	1	0.96789	0.95948	1	16431	0	1.2242	0.032109	0.040521	0.820419	553	1	1.2242
hsa-mir-548f-4	1	0.96786	0.95948	1	16430	0	1.6122	0.03214	0.040521	0.820419	554	1	1.6122
SYNC	2	0.98034	0.98023	1	16654	0	-0.65619	0.03214	0.049635	0.820419	555	1	-0.65619
CFD	2	0.81153	0.89276	1	13846	0	-2.0478	0.032201	0.049635	0.820419	556	1	-2.0478
PRAMEF22	1	0.9678	0.95948	1	16429	0	1.0559	0.032202	0.040521	0.820419	557	1	1.0559
hsa-mir-4292	1	0.96764	0.95948	1	16426	0	1.2084	0.032356	0.040521	0.820419	558	1	1.2084
MPLKIP	1	0.96761	0.95948	1	16424	0	1.2404	0.032387	0.040521	0.820419	559	1	1.2404
PXDC1	2	0.43393	0.69744	1	8289	1	-2.9766	0.032444	0.049635	0.820419	560	1	-2.9766
UCHL1	2	0.11559	0.37974	1	2875	1	-3.7818	0.032505	0.049635	0.820419	561	1	-3.7818
BEAN1	1	0.96746	0.95948	1	16422	0	1.0387	0.032542	0.040521	0.820419	562	1	1.0387
hsa-mir-154	1	0.96724	0.95948	1	16419	0	1.6115	0.032758	0.040521	0.820419	563	1	1.6115
ANO10	3	0.40413	0.76222	1	7859	1	-6.1686	0.032764	0.059547	0.820419	564	1	-6.1686
hsa-mir-5701-1	1	0.96715	0.95745	1	16418	0	0.96712	0.03285	0.042551	0.820419	565	1	0.96712
PLVAP	1	0.96712	0.95745	1	16416	0	1.1359	0.032881	0.042551	0.820419	566	1	1.1359
PRAMEF18	2	0.93387	0.94761	1	15830	0	-1.2486	0.033112	0.053476	0.820419	567	1	-1.2486
ACACA	4	0.56101	0.88676	1	10061	2	-4.4055	0.033126	0.075855	0.820419	568	1	-4.4055
ZUFSP	3	0.34583	0.72625	1	7019	1	-2.2592	0.033126	0.059547	0.820419	569	1	-2.2592
hsa-mir-6833	2	0.74654	0.85824	1	12770	1	-2.2049	0.033173	0.053476	0.820419	570	1	-2.2049
SLC25A10	3	0.33096	0.71796	1	6801	2	-8.535	0.033217	0.059547	0.820419	571	1	-8.535
SOCS4	1	0.96678	0.95538	1	16412	0	1.3034	0.033221	0.044616	0.820419	572	1	1.3034
CRCP	1	0.96675	0.95538	1	16411	0	1.4602	0.033252	0.044616	0.820419	573	1	1.4602
PAH	2	0.97449	0.97532	1	16555	0	-0.92378	0.033294	0.053476	0.820419	574	1	-0.92378
RPL34	1	0.96662	0.95538	1	16409	0	1.2023	0.033376	0.044616	0.820419	575	1	1.2023
PKIB	1	0.96656	0.95538	1	16407	0	1.0135	0.033437	0.044616	0.820419	576	1	1.0135
IFNE	3	0.56437	0.8549	1	10109	1	-6.0839	0.033489	0.059547	0.820419	577	1	-6.0839
hsa-mir-3658	1	0.96644	0.95538	1	16405	0	1.1897	0.033561	0.044616	0.820419	578	1	1.1897
LDOC1	2	0.30694	0.60552	1	6497	1	-3.3325	0.03372	0.053477	0.820419	579	1	-3.3325
TECR	1	0.96625	0.95538	1	16404	0	1.0481	0.033746	0.044617	0.820419	580	1	1.0481
GNAT3	1	0.96619	0.95538	1	16403	0	1.0539	0.033808	0.044617	0.820419	581	1	1.0539
HUNK	1	0.96616	0.95538	1	16402	0	1.084	0.033839	0.044617	0.820419	582	1	1.084
GPC2	3	0.73312	0.90649	1	12557	1	-7.3429	0.033851	0.059547	0.820419	583	1	-7.3429
C2orf54	1	0.96613	0.95538	1	16401	0	1.1972	0.03387	0.044617	0.820419	584	1	1.1972
GH1	2	0.72812	0.84291	1	12481	1	-2.677	0.033963	0.053477	0.820419	585	1	-2.677
PM20D1	3	0.16055	0.53946	1	3871	2	-8.3928	0.034032	0.059547	0.820419	586	1	-8.3928
PRMT6	2	0.96869	0.97202	1	16447	0	-1.1954	0.034084	0.053477	0.820419	587	1	-1.1954
ARL3	1	0.96591	0.95538	1	16400	0	1.088	0.034086	0.044617	0.820419	588	1	1.088
hsa-mir-1283-1	3	0.54995	0.84981	1	9889	1	-0.74367	0.034123	0.059547	0.820419	589	1	-0.74367
STAT1	1	0.96582	0.95538	1	16398	0	1.0048	0.034179	0.044617	0.820419	590	1	1.0048
FERMT3	1	0.96573	0.95538	1	16397	0	1.1785	0.034271	0.044617	0.820419	591	1	1.1785
ZDHHC8	1	0.96567	0.95335	1	16396	0	1.3341	0.034333	0.046646	0.820419	592	1	1.3341
ZNF692	1	0.96557	0.95335	1	16395	0	0.94758	0.034426	0.046647	0.820419	593	1	0.94758
hsa-mir-3918	3	0.67147	0.8894	1	11638	1	-6.6108	0.034485	0.059547	0.820419	594	1	-6.6108
RAB35	3	0.3253	0.71421	1	6730	1	-6.8147	0.034575	0.059547	0.820419	595	1	-6.8147
SH3RF2	1	0.96539	0.95126	1	16392	0	1.3209	0.034611	0.048744	0.820419	596	1	1.3209
ZCCHC13	2	0.022758	0.11399	1	646	1	-3.9964	0.03463	0.057383	0.820419	597	1	-3.9964
RBM27	3	0.55396	0.84981	1	9956	1	-4.4874	0.034666	0.059547	0.820419	598	1	-4.4874
DNAJC16	1	0.96533	0.95126	1	16390	0	1.2233	0.034673	0.048744	0.820419	599	1	1.2233
TAS1R3	2	0.38043	0.65914	1	7507	1	-3.3497	0.034691	0.057383	0.820419	600	1	-3.3497
ARV1	1	0.9653	0.95126	1	16388	0	1.1383	0.034704	0.048744	0.820419	601	1	1.1383
CSAD	2	0.79195	0.88181	1	13519	0	-2.4283	0.034752	0.057383	0.820419	602	1	-2.4283
NPDC1	1	0.9652	0.95126	1	16385	0	0.92063	0.034796	0.048745	0.820419	603	1	0.92063
MAGT1	4	0.42433	0.83603	1	8151	2	-8.0408	0.034811	0.075855	0.820419	604	1	-8.0408
CYP1A2	1	0.96508	0.95126	1	16378	0	0.93987	0.03492	0.048745	0.820419	605	1	0.93987
CCDC69	2	0.88977	0.92723	1	15096	0	-1.5066	0.034994	0.057383	0.820419	606	1	-1.5066
SLC46A2	4	0.053207	0.3675	1	1449	3	-8.506	0.035052	0.075855	0.820419	607	1	-8.506
PAG1	2	0.78636	0.87755	1	13423	0	-2.4248	0.035116	0.057383	0.820419	608	1	-2.4248
TAF7	2	0.6507	0.81074	1	11330	1	-2.6891	0.035177	0.057383	0.820419	609	1	-2.6891
MNX1	1	0.96477	0.94722	1	16373	0	1.1768	0.035229	0.052783	0.820419	610	1	1.1768
SCUBE1	2	0.26677	0.57935	1	5920	1	-3.4187	0.035237	0.057383	0.820419	611	1	-3.4187
VPS11	2	0.51845	0.75279	1	9473	1	-3.1043	0.035298	0.057383	0.820419	612	1	-3.1043
hsa-mir-6863	1	0.96465	0.94722	1	16372	0	1.3155	0.035352	0.052783	0.820419	613	1	1.3155
ANKRD28	2	0.98151	0.98192	1	16681	0	-0.17238	0.035419	0.057383	0.820419	614	1	-0.17238
PCDHB15	2	0.99221	0.98877	1	16850	0	0.14256	0.03548	0.057383	0.820419	615	1	0.14256
ABCB4	4	0.21288	0.67244	1	4918	1	-4.2941	0.035533	0.075855	0.820419	616	1	-4.2941
ENGASE	2	0.8115	0.89276	1	13845	0	-2.4356	0.035601	0.057383	0.820419	617	1	-2.4356
RNF222	1	0.96434	0.94722	1	16368	0	1.124	0.035661	0.052783	0.820419	618	1	1.124
hsa-mir-3153	1	0.96431	0.94722	1	16366	0	1.0804	0.035692	0.052783	0.820419	619	1	1.0804
MAP10	1	0.96428	0.94722	1	16365	0	1.0018	0.035723	0.052783	0.820419	620	1	1.0018
SETD2	1	0.96422	0.94722	1	16364	0	1.3003	0.035785	0.052783	0.820419	621	1	1.3003
CACNB3	2	0.20048	0.50953	1	4677	1	-3.2839	0.035905	0.057383	0.820419	622	1	-3.2839
TMEM150C	3	0.37955	0.7492	1	7496	2	-8.3759	0.035933	0.059548	0.820419	623	1	-8.3759
DNAJB7	1	0.96406	0.94722	1	16361	0	1.0001	0.035939	0.052783	0.820419	624	1	1.0001
PLA2G10	3	0.82246	0.92801	1	14013	1	-4.7741	0.036023	0.059548	0.820419	625	1	-4.7741
NDUFB2	1	0.96391	0.94722	1	16356	0	1.0756	0.036094	0.052783	0.820419	626	1	1.0756
CDH11	3	0.8295	0.92972	1	14138	1	-1.7044	0.036113	0.059548	0.820419	627	1	-1.7044
DYM	1	0.96388	0.94722	1	16354	0	1.0036	0.036125	0.052783	0.820419	628	1	1.0036
FBXW7	1	0.96381	0.94722	1	16352	0	1.0635	0.036186	0.052783	0.820419	629	1	1.0635
NADKD1	1	0.96378	0.94722	1	16350	0	0.87161	0.036217	0.052783	0.820419	630	1	0.87161
ATP13A5	2	0.96821	0.97064	1	16438	0	-0.15773	0.036268	0.057383	0.820419	631	1	-0.15773
ECHDC3	2	0.069515	0.26557	1	1840	1	-3.9141	0.036329	0.057383	0.820419	632	1	-3.9141
VWA9	4	0.38214	0.81798	1	7533	1	-6.2313	0.036374	0.075855	0.820419	633	1	-6.2313
RTFDC1	1	0.9636	0.94722	1	16348	0	0.9167	0.036403	0.052783	0.820419	634	1	0.9167
ASXL3	3	0.77534	0.91595	1	13236	1	-6.6796	0.036475	0.059548	0.820419	635	1	-6.6796
ADAM9	3	0.9676	0.98119	1	16423	0	-6.6153	0.036565	0.059548	0.820419	636	1	-6.6153
GARNL3	1	0.96338	0.94722	1	16343	0	0.84944	0.036619	0.052783	0.820419	637	1	0.84944
GRIN1	1	0.96329	0.94722	1	16341	0	0.8624	0.036712	0.052783	0.820419	638	1	0.8624
LMF2	1	0.9632	0.94722	1	16339	0	0.96439	0.036804	0.052783	0.820419	639	1	0.96439
FOXJ3	3	0.9176	0.96436	1	15555	0	-1.4255	0.036927	0.059548	0.820419	640	1	-1.4255
HMP19	1	0.96307	0.94722	1	16337	0	0.81109	0.036928	0.052783	0.820419	641	1	0.81109
RPH3A	2	0.72236	0.83675	1	12387	1	-2.6521	0.036935	0.057383	0.820419	642	1	-2.6521
SPATA31A5	1	0.96292	0.94722	1	16334	0	0.72303	0.037082	0.052783	0.820419	643	1	0.72303
hsa-mir-3188	1	0.96289	0.94722	1	16332	0	1.0957	0.037113	0.052783	0.820419	644	1	1.0957
FOXD3	2	0.94648	0.95829	1	16058	0	-1.4321	0.037117	0.057383	0.820419	645	1	-1.4321
DNTTIP2	1	0.96286	0.94722	1	16331	0	0.96201	0.037144	0.052783	0.820419	646	1	0.96201
GRIN2D	2	0.84651	0.90963	1	14407	0	-2.196	0.037178	0.057383	0.820419	647	1	-2.196
FN1	3	0.15551	0.53764	1	3739	1	0.1021	0.037198	0.059548	0.820419	648	1	0.1021
DDX39A	2	0.68161	0.82454	1	11784	1	-2.7184	0.037239	0.057383	0.820419	649	1	-2.7184
ZNF660	3	0.79164	0.92032	1	13511	1	-1.5567	0.037288	0.059548	0.820419	650	1	-1.5567
hsa-mir-623	1	0.96267	0.94722	1	16328	0	1.1851	0.037329	0.052783	0.820419	651	1	1.1851
SGCG	1	0.96264	0.94722	1	16326	0	0.84327	0.03736	0.052783	0.820419	652	1	0.84327
PHGR1	3	0.40086	0.75939	1	7818	2	-8.3075	0.037469	0.059548	0.820419	653	1	-8.3075
MLN	1	0.96249	0.94722	1	16324	0	1.2549	0.037515	0.052783	0.820419	654	1	1.2549
HEY2	3	0.95033	0.97614	1	16123	0	-4.6267	0.037559	0.059548	0.820419	655	1	-4.6267
COX14	2	0.74971	0.85977	1	12818	1	-2.7663	0.037602	0.057383	0.820419	656	1	-2.7663
PDZK1	1	0.96239	0.94722	1	16322	0	1.0033	0.037607	0.052783	0.820419	657	1	1.0033
CHID1	1	0.96221	0.94722	1	16321	0	0.96641	0.037793	0.052783	0.820419	658	1	0.96641
CTSB	3	0.033391	0.23626	1	938	2	-9.8641	0.037921	0.059548	0.820419	659	1	-9.8641
EIF2B5	1	0.96205	0.94519	1	16320	0	0.75986	0.037947	0.054815	0.820419	660	1	0.75986
TMEM123	2	0.15551	0.45118	1	3740	1	-3.7908	0.038087	0.057383	0.820419	661	1	-3.7908
SLC25A24	1	0.96184	0.94518	1	16317	0	0.86851	0.038163	0.054815	0.820419	662	1	0.86851
FAM194B	3	0.19002	0.59207	1	4446	2	-9.0058	0.038192	0.059548	0.820419	663	1	-9.0058
C5AR1	2	0.17935	0.48521	1	4247	1	-3.7868	0.038269	0.057383	0.820419	664	1	-3.7868
FAM43B	3	0.12062	0.47689	1	2996	2	-9.3021	0.038282	0.059548	0.820419	665	1	-9.3021
TMC5	1	0.96165	0.94518	1	16314	0	0.57191	0.038349	0.054815	0.820419	666	1	0.57191
SPDYE2L	1	0.96156	0.94518	1	16312	0	0.74922	0.038441	0.054815	0.820419	667	1	0.74922
SERP2	5	0.64009	0.93837	1	11172	2	-5.9519	0.038543	0.097936	0.820419	668	1	-5.9519
ATXN7L2	1	0.96144	0.94311	1	16311	0	0.89719	0.038565	0.056893	0.820419	669	1	0.89719
MRPL54	1	0.96131	0.94311	1	16307	0	0.93348	0.038688	0.056893	0.820419	670	1	0.93348
hsa-mir-218-2	1	0.96128	0.94311	1	16306	0	0.92073	0.038719	0.056894	0.820419	671	1	0.92073
GABARAPL2	3	0.62114	0.87294	1	10891	1	-6.8522	0.038733	0.059548	0.820419	672	1	-6.8522
LCE1B	1	0.96119	0.94311	1	16303	0	0.96011	0.038812	0.056894	0.820419	673	1	0.96011
RUVBL2	1	0.96116	0.94311	1	16302	0	0.80609	0.038843	0.056894	0.820419	674	1	0.80609
NCKAP5L	3	0.94376	0.97455	1	16004	0	-7.0181	0.038914	0.059548	0.820419	675	1	-7.0181
NF2	2	0.90837	0.93468	1	15397	0	-2.3371	0.039056	0.057383	0.820419	676	1	-2.3371
TRIM77	3	0.43012	0.7785	1	8237	1	-7.8591	0.039185	0.059548	0.820419	677	1	-7.8591
IFFO2	2	0.77608	0.86873	1	13249	0	-2.4795	0.039238	0.057383	0.820419	678	1	-2.4795
LDB2	4	0.18917	0.63714	1	4436	2	-5.8851	0.039255	0.082506	0.820419	679	1	-5.8851
KIR2DL1	2	0.22889	0.54354	1	5243	1	-3.6802	0.039298	0.057383	0.820419	680	1	-3.6802
NEUROG2	3	0.74726	0.90735	1	12784	1	-3.1996	0.039365	0.059548	0.820419	681	1	-3.1996
MAGED4B	1	0.9606	0.93909	1	16297	0	0.7977	0.039399	0.06091	0.820419	682	1	0.7977
hsa-mir-6749	2	0.9229	0.93877	1	15644	0	-2.1532	0.03942	0.057383	0.820419	683	1	-2.1532
MDH2	3	0.44583	0.79297	1	8462	1	-6.4237	0.039455	0.059548	0.820419	684	1	-6.4237
hsa-mir-6780a	1	0.96051	0.93909	1	16296	0	0.79561	0.039492	0.06091	0.820419	685	1	0.79561
SGPP2	3	0.026042	0.20274	1	745	2	-8.7262	0.039545	0.059548	0.820419	686	1	-8.7262
RTTN	2	0.94632	0.95829	1	16054	0	-1.2338	0.039662	0.057383	0.820419	687	1	-1.2338
MOGAT3	2	0.036693	0.15977	1	1025	1	-4.1057	0.039722	0.057383	0.820419	688	1	-4.1057
FIG4	2	0.97823	0.97843	1	16617	0	-0.15368	0.039783	0.057383	0.820419	689	1	-0.15368
ISCA2	1	0.9602	0.93909	1	16293	0	0.84105	0.0398	0.06091	0.820419	690	1	0.84105
GET4	3	0.83341	0.93056	1	14196	1	-6.2403	0.039816	0.059548	0.820419	691	1	-6.2403
TMEM230	1	0.96001	0.93909	1	16291	0	0.58416	0.039986	0.060911	0.820419	692	1	0.58416
TAAR5	2	0.93842	0.9522	1	15910	0	-1.791	0.040085	0.057383	0.820419	693	1	-1.791
MX1	2	0.9593	0.96557	1	16282	0	-1.6102	0.040146	0.057383	0.820419	694	1	-1.6102
CBX5	2	0.94333	0.9557	1	15993	0	-1.7055	0.040207	0.057383	0.820419	695	1	-1.7055
SLC46A1	2	0.97343	0.97469	1	16533	0	-0.47228	0.040328	0.057383	0.820419	696	1	-0.47228
ACTG1	1	0.9594	0.93909	1	16284	0	0.5629	0.040604	0.060911	0.820419	697	1	0.5629
PODXL2	3	0.99225	0.99373	1	16851	0	-4.0345	0.040627	0.059548	0.820419	698	1	-4.0345
hsa-mir-105-2	1	0.95933	0.93909	1	16283	0	0.60705	0.040665	0.060911	0.820419	699	1	0.60705
LAT2	2	0.98515	0.98457	1	16742	0	-0.38156	0.040691	0.057383	0.820419	700	1	-0.38156
PPP1R42	2	0.19805	0.50623	1	4635	1	-3.7486	0.040751	0.057383	0.820419	701	1	-3.7486
ITGA1	1	0.95915	0.93704	1	16281	0	0.85388	0.040851	0.062955	0.820419	702	1	0.85388
STARD3	2	0.49954	0.74347	1	9222	1	-3.2595	0.040872	0.057383	0.820419	703	1	-3.2595
FLT1	2	0.16626	0.46985	1	3996	1	-3.9012	0.041054	0.057383	0.820419	704	1	-3.9012
CA9	4	0.48052	0.85498	1	8968	2	-6.4356	0.041292	0.082506	0.820419	705	1	-6.4356
hsa-mir-1263	1	0.95866	0.93704	1	16277	0	0.56781	0.041345	0.062955	0.820419	706	1	0.56781
TOPORS	2	0.9948	0.99268	1	16902	0	0.50825	0.041356	0.061182	0.820419	707	1	0.50825
hsa-mir-4275	1	0.95856	0.93704	1	16274	0	0.50273	0.041438	0.062955	0.820419	708	1	0.50273
DLK2	3	0.25802	0.66015	1	5793	1	-7.3018	0.041439	0.059548	0.820419	709	1	-7.3018
IGF1	1	0.9585	0.93704	1	16272	0	0.44112	0.041499	0.062955	0.820419	710	1	0.44112
RASGEF1B	2	0.37712	0.65609	1	7461	1	-3.3671	0.041538	0.061182	0.820419	711	1	-3.3671
PDE10A	2	0.84187	0.90836	1	14335	0	-2.5899	0.041598	0.061182	0.820419	712	1	-2.5899
ZNF81	2	0.7522	0.85977	1	12861	0	-2.802	0.041659	0.061182	0.820419	713	1	-2.802
PDLIM3	1	0.95828	0.93704	1	16268	0	0.533	0.041716	0.062955	0.820419	714	1	0.533
MLLT3	2	0.72043	0.83675	1	12354	1	-2.9583	0.041719	0.061182	0.820419	715	1	-2.9583
PRSS8	1	0.95816	0.93704	1	16267	0	0.55088	0.041839	0.062955	0.820419	716	1	0.55088
CNRIP1	2	0.73805	0.85211	1	12630	1	-2.386	0.04184	0.061182	0.820419	717	1	-2.386
TMC6	2	0.10878	0.36124	1	2720	1	-3.8155	0.041961	0.061182	0.820419	718	1	-3.8155
WRAP73	2	0.084117	0.30867	1	2181	1	-3.9064	0.042021	0.061182	0.820419	719	1	-3.9064
OR4Q3	3	0.83719	0.93144	1	14249	1	-7.9141	0.042069	0.064939	0.820419	720	1	-7.9141
hsa-mir-147a	1	0.95788	0.93704	1	16265	0	0.49303	0.042117	0.062955	0.820419	721	1	0.49303
FUK	2	0.097253	0.34122	1	2470	1	-3.9818	0.042142	0.061182	0.820419	722	1	-3.9818
MISP	1	0.95779	0.93704	1	16262	0	0.43892	0.04221	0.062955	0.820419	723	1	0.43892
SPATA2	1	0.9577	0.93704	1	16259	0	0.58407	0.042302	0.062955	0.820419	724	1	0.58407
PCDH19	2	0.74474	0.85824	1	12740	1	-2.8191	0.042324	0.061182	0.820419	725	1	-2.8191
ANG	1	0.9576	0.93704	1	16256	0	0.68908	0.042395	0.062955	0.820419	726	1	0.68908
TREML2	2	0.98063	0.98023	1	16663	0	-0.96934	0.042445	0.061182	0.820419	727	1	-0.96934
RTN4RL1	1	0.95754	0.93704	1	16255	0	0.49867	0.042457	0.062955	0.820419	728	1	0.49867
PRAP1	1	0.95742	0.93704	1	16253	0	0.40669	0.04258	0.062955	0.820419	729	1	0.40669
hsa-mir-6732	1	0.95733	0.93704	1	16250	0	0.41976	0.042673	0.062955	0.820419	730	1	0.41976
IKZF1	2	0.78935	0.8804	1	13479	0	-2.2609	0.042807	0.061182	0.820419	731	1	-2.2609
ALG8	2	0.99435	0.99235	1	16891	0	0.76254	0.042928	0.061182	0.820419	732	1	0.76254
hsa-mir-6895	1	0.95696	0.93704	1	16246	0	0.39633	0.043044	0.062955	0.820419	733	1	0.39633
GAL3ST1	2	0.99026	0.98788	1	16820	0	-0.065045	0.043049	0.061182	0.820419	734	1	-0.065045
PGF	3	0.39753	0.75696	1	7771	2	-8.3183	0.043059	0.070285	0.820419	735	1	-8.3183
CNPPD1	1	0.95693	0.93704	1	16245	0	0.31821	0.043075	0.062955	0.820419	736	1	0.31821
EMC6	4	0.99713	0.99823	1	16945	0	-2.9154	0.043086	0.082506	0.820419	737	1	-2.9154
TOR2A	2	0.95128	0.96321	1	16146	0	-1.5419	0.043109	0.061182	0.820419	738	1	-1.5419
COX19	3	0.85099	0.93487	1	14478	1	-5.7272	0.043149	0.070285	0.820419	739	1	-5.7272
ZBTB8OS	1	0.95683	0.93704	1	16243	0	0.41421	0.043167	0.062955	0.820419	740	1	0.41421
RPAP1	2	0.95785	0.96479	1	16263	0	-1.8047	0.043291	0.061182	0.820419	741	1	-1.8047
GPRC5A	2	0.56086	0.76954	1	10059	1	-3.2692	0.043412	0.061182	0.820419	742	1	-3.2692
hsa-mir-6819	1	0.95659	0.93704	1	16241	0	0.46223	0.043414	0.062956	0.820419	743	1	0.46223
BSG	3	0.57572	0.85836	1	10249	1	-7.684	0.043509	0.070285	0.820419	744	1	-7.684
GIMAP4	1	0.95643	0.93704	1	16240	0	0.28013	0.043569	0.062956	0.820419	745	1	0.28013
AQP8	2	0.99581	0.99301	1	16922	0	0.6175	0.043593	0.061182	0.820419	746	1	0.6175
SKAP1	2	0.82294	0.89938	1	14023	0	-2.8524	0.043653	0.061182	0.820419	747	1	-2.8524
AGO1	4	0.084676	0.45939	1	2195	2	-8.4084	0.043684	0.082506	0.820419	748	1	-8.4084
IMPG2	1	0.95631	0.93704	1	16238	0	0.43294	0.043692	0.062956	0.820419	749	1	0.43294
ZNF18	4	0.6105	0.90457	1	10730	1	-7.2473	0.043803	0.082506	0.820419	750	1	-7.2473
GXYLT1	1	0.95609	0.93704	1	16236	0	0.48161	0.043909	0.062956	0.820419	751	1	0.48161
LOC100130480	2	0.93699	0.95043	1	15886	0	-1.3422	0.043955	0.065001	0.820419	752	1	-1.3422
OR10J1	2	0.56515	0.77104	1	10117	1	-3.1802	0.044076	0.065001	0.820419	753	1	-3.1802
A1CF	2	0.41504	0.6852	1	8021	1	-3.535	0.044137	0.065001	0.820419	754	1	-3.535
NAPSA	4	0.17461	0.60576	1	4152	1	-5.8579	0.044162	0.082506	0.820419	755	1	-5.8579
IFT43	2	0.87723	0.9239	1	14885	0	-1.8699	0.044197	0.065001	0.820419	756	1	-1.8699
hsa-mir-6874	1	0.95575	0.93704	1	16234	0	0.3655	0.044248	0.062956	0.820419	757	1	0.3655
ATP1B4	1	0.95572	0.93704	1	16232	0	0.33683	0.044279	0.062956	0.820419	758	1	0.33683
MAN2B1	1	0.95569	0.93704	1	16231	0	0.36432	0.04431	0.062956	0.820419	759	1	0.36432
SLC35B3	1	0.95566	0.93704	1	16229	0	0.36099	0.044341	0.062956	0.820419	760	1	0.36099
CCDC38	1	0.95563	0.93704	1	16228	0	0.32886	0.044372	0.062956	0.820419	761	1	0.32886
PDCD1	2	0.83575	0.90583	1	14231	0	-2.7616	0.044378	0.065002	0.820419	762	1	-2.7616
ETF1	3	0.84176	0.93487	1	14332	1	-5.3077	0.044408	0.070285	0.820419	763	1	-5.3077
hsa-mir-6775	1	0.95557	0.93704	1	16225	0	0.29588	0.044434	0.062956	0.820419	764	1	0.29588
TIGD2	2	0.013821	0.083958	1	390	1	-4.4057	0.044438	0.065002	0.820419	765	1	-4.4057
SUN3	1	0.9555	0.93704	1	16224	0	0.48906	0.044496	0.062956	0.820419	766	1	0.48906
LOC100507462	1	0.95541	0.93704	1	16221	0	0.33829	0.044588	0.062956	0.820419	767	1	0.33829
RP2	3	0.58723	0.85923	1	10387	1	-7.3042	0.044678	0.070285	0.820419	768	1	-7.3042
GRAMD4	2	0.45122	0.70664	1	8538	1	-3.5079	0.04468	0.065002	0.820419	769	1	-3.5079
KIAA0101	1	0.95529	0.93704	1	16220	0	0.31699	0.044712	0.062956	0.820419	770	0	0.31699
ACLY	2	0.055338	0.21596	1	1507	1	-4.1827	0.04474	0.065002	0.820419	771	1	-4.1827
HNF1B	3	0.35334	0.73267	1	7119	1	-6.6338	0.044858	0.070285	0.820419	772	1	-6.6338
SLC11A1	1	0.95507	0.93704	1	16218	0	0.22245	0.044928	0.062956	0.820419	773	0	0.22245
EXO5	3	0.36928	0.74078	1	7352	1	-7.3599	0.045038	0.070285	0.820419	774	1	-7.3599
GLS2	2	0.94732	0.95991	1	16068	0	-1.5768	0.045103	0.068821	0.820419	775	1	-1.5768
MTL5	2	0.56343	0.77104	1	10096	1	-3.1795	0.045284	0.068821	0.820419	776	1	-3.1795
hsa-mir-219a-1	1	0.95464	0.93704	1	16215	0	0.21001	0.04536	0.062956	0.820419	777	0	0.21001
CD53	2	0.9008	0.9305	1	15288	0	-1.9604	0.045404	0.068821	0.820419	778	1	-1.9604
KBTBD11	3	0.69481	0.8945	1	11978	1	-6.2113	0.045487	0.070285	0.820419	779	1	-6.2113
APOLD1	2	0.40417	0.67755	1	7861	1	-3.3216	0.045525	0.068821	0.820419	780	1	-3.3216
hsa-mir-4539	1	0.95445	0.93704	1	16212	0	0.19244	0.045546	0.062956	0.820419	781	0	0.19244
HSF1	1	0.95433	0.93704	1	16211	0	0.27182	0.045669	0.062956	0.820419	782	0	0.27182
HPS5	1	0.95418	0.93502	1	16208	0	0.20916	0.045824	0.064978	0.820419	783	0	0.20916
ESR1	3	0.86136	0.93999	1	14637	1	-8.0245	0.045846	0.070285	0.820419	784	1	-8.0245
hsa-mir-6815	1	0.95411	0.93502	1	16207	0	0.17883	0.045886	0.064978	0.820419	785	0	0.17883
PDS5A	2	0.64785	0.80923	1	11290	1	-2.8844	0.045887	0.068821	0.820419	786	1	-2.8844
KLHL12	1	0.95408	0.93502	1	16205	0	0.25066	0.045916	0.064978	0.820419	787	0	0.25066
HSPA2	2	0.98738	0.98601	1	16772	0	-0.57857	0.045948	0.068821	0.820419	788	1	-0.57857
OTUD6A	1	0.95396	0.93502	1	16202	0	0.27408	0.04604	0.064978	0.820419	789	0	0.27408
TPST1	1	0.95393	0.93502	1	16201	0	0.25014	0.046071	0.064978	0.820419	790	0	0.25014
DAXX	2	0.25081	0.57318	1	5676	1	-3.6194	0.046189	0.068821	0.820419	791	1	-3.6194
VILL	1	0.95381	0.933	1	16198	0	0.22769	0.046194	0.066995	0.820419	792	0	0.22769
hsa-mir-4423	3	0.97102	0.98204	1	16488	0	0.25757	0.046295	0.070285	0.820419	793	1	0.25757
hsa-mir-374b	2	0.0050902	0.045487	1	146	1	-4.623	0.04631	0.068821	0.820419	794	1	-4.623
hsa-mir-663b	1	0.95368	0.933	1	16195	0	0.19893	0.046318	0.066995	0.820419	795	0	0.19893
TMEM249	1	0.95362	0.933	1	16193	0	0.21778	0.04638	0.066995	0.820419	796	0	0.21778
hsa-mir-448	1	0.95337	0.933	1	16187	0	0.21577	0.046627	0.066996	0.820419	797	0	0.21577
ANGPTL3	2	0.54587	0.76501	1	9830	1	-3.3575	0.046792	0.068821	0.820419	798	1	-3.3575
ZNF138	1	0.95319	0.933	1	16184	0	0.15925	0.046812	0.066996	0.820419	799	0	0.15925
TAC3	2	0.50507	0.74502	1	9299	1	-3.2924	0.047094	0.068821	0.820419	800	1	-3.2924
FAM19A4	2	0.98568	0.98507	1	16753	0	-0.12512	0.047154	0.068821	0.820419	801	1	-0.12512
hsa-mir-4280	1	0.95282	0.93095	1	16178	0	0.1263	0.047183	0.06905	0.820419	802	0	0.1263
VAC14	3	0.40368	0.7608	1	7851	2	-8.3002	0.047193	0.0757	0.820419	803	1	-8.3002
MARK3	2	0.99541	0.99301	1	16916	0	0.31093	0.047275	0.068821	0.820419	804	1	0.31093
PRKX	1	0.95269	0.93095	1	16175	0	0.13816	0.047306	0.06905	0.820419	805	0	0.13816
DAZAP2	3	0.91042	0.96161	1	15438	0	-2.2618	0.047372	0.0757	0.820419	806	1	-2.2618
hsa-mir-6508	1	0.95254	0.93095	1	16171	0	0.19977	0.047461	0.06905	0.820419	807	0	0.19977
CPE	3	0.39526	0.75293	1	7736	2	-7.9875	0.047462	0.0757	0.820419	808	1	-7.9875
INPP1	5	0.42483	0.87596	1	8158	2	-5.5467	0.04749	0.10581	0.820419	809	1	-5.5467
USP24	1	0.95238	0.93095	1	16167	0	0.14902	0.047615	0.06905	0.820419	810	0	0.14902
CLUL1	2	0.17015	0.47679	1	4062	1	-4.0023	0.047757	0.068821	0.820419	811	1	-4.0023
MAFK	2	0.8529	0.91333	1	14509	0	-2.1348	0.047817	0.068821	0.820419	812	1	-2.1348
PCP4L1	1	0.95214	0.93095	1	16165	0	0.095994	0.047862	0.06905	0.820419	813	0	0.095994
KEL	3	0.96738	0.98119	1	16420	0	-5.0996	0.048	0.075701	0.820419	814	1	-5.0996
GPR25	2	0.077839	0.28659	1	2032	1	-4.141	0.048058	0.068821	0.820419	815	1	-4.141
GJA3	1	0.95192	0.93095	1	16161	0	0.10915	0.048079	0.06905	0.820419	816	0	0.10915
ARHGDIG	3	0.87763	0.94769	1	14896	0	-6.7368	0.04809	0.075701	0.820419	817	1	-6.7368
TM6SF1	4	0.16574	0.59868	1	3978	3	-8.6574	0.048097	0.082506	0.820419	818	1	-8.6574
SPAG9	1	0.95183	0.93095	1	16159	0	0.093535	0.048171	0.06905	0.820419	819	0	0.093535
PLIN3	2	0.30163	0.60403	1	6405	1	-3.8708	0.048179	0.068821	0.820419	820	1	-3.8708
SCGB1A1	3	0.23523	0.64273	1	5368	2	-8.7202	0.048179	0.075701	0.820419	821	1	-8.7202
ADAM10	1	0.9518	0.93095	1	16157	0	0.13704	0.048202	0.06905	0.820419	822	0	0.13704
SLC5A4	1	0.95177	0.93095	1	16156	0	0.08818	0.048233	0.06905	0.820419	823	0	0.08818
C10orf53	1	0.95174	0.93095	1	16155	0	0.091231	0.048264	0.06905	0.820419	824	0	0.091231
hsa-mir-6846	2	0.56799	0.77412	1	10157	1	-3.355	0.048601	0.068821	0.820419	825	1	-3.355
CABP1	1	0.9514	0.93095	1	16148	0	0.077503	0.048604	0.06905	0.820419	826	0	0.077503
RECQL	2	0.71114	0.83675	1	12213	1	-3.1323	0.048721	0.068821	0.820419	827	1	-3.1323
APAF1	1	0.95124	0.93095	1	16145	0	0.060108	0.048758	0.069051	0.820419	828	0	0.060108
AKR1B15	2	0.43551	0.70051	1	8308	1	-3.6836	0.048782	0.068821	0.820419	829	1	-3.6836
HIST1H2AK	1	0.95121	0.93095	1	16144	0	0.056743	0.048789	0.069051	0.820419	830	0	0.056743
ABCB10	2	0.20031	0.50953	1	4673	1	-4.0329	0.048842	0.068822	0.820419	831	1	-4.0329
hsa-mir-4322	3	0.96701	0.98119	1	16413	0	-5.2294	0.048896	0.081179	0.820419	832	1	-5.2294
ZNF354C	2	0.90824	0.93468	1	15395	0	-2.4687	0.048962	0.068822	0.820419	833	1	-2.4687
RGPD3	1	0.95099	0.93095	1	16141	0	0.060824	0.049005	0.069051	0.820419	834	0	0.060824
hsa-mir-4327	2	0.34337	0.63152	1	6985	1	-3.7583	0.049083	0.068822	0.820419	835	1	-3.7583
CCDC62	1	0.95087	0.93095	1	16139	0	0.032434	0.049129	0.069051	0.820419	836	0	0.032434
C6orf25	3	0.18166	0.57528	1	4289	2	-8.4752	0.049165	0.081179	0.820419	837	1	-8.4752
PYGO2	1	0.95075	0.93095	1	16137	0	0.026785	0.049252	0.069051	0.820419	838	0	0.026785
hsa-mir-6763	1	0.95069	0.93095	1	16136	0	0.016716	0.049314	0.069051	0.820419	839	0	0.016716
MAS1	2	0.92865	0.9457	1	15736	0	-2.1695	0.049324	0.068822	0.820419	840	1	-2.1695
COPG1	3	0.56523	0.8549	1	10118	1	-5.5322	0.049434	0.081179	0.820419	841	1	-5.5322
ABHD13	2	0.14366	0.43783	1	3504	1	-4.0184	0.049504	0.068822	0.820419	842	1	-4.0184
hsa-mir-513b	1	0.95044	0.93095	1	16129	0	0.0056831	0.049561	0.069051	0.820419	843	0	0.0056831
LRRC40	1	0.95041	0.93095	1	16128	0	0.0044222	0.049592	0.069051	0.820419	844	0	0.0044222
CATSPERB	3	0.060944	0.31722	1	1637	2	-7.41	0.049613	0.081179	0.820419	845	1	-7.41
SAMD14	1	0.95032	0.93095	1	16122	0	-0.0079069	0.049685	0.069051	0.820419	846	0	-0.0079069
PHF15	3	0.25147	0.65447	1	5689	2	-8.5165	0.049703	0.081179	0.820419	847	1	-8.5165
ENPP5	1	0.95028	0.93095	1	16121	0	-0.0091935	0.049716	0.069051	0.820419	848	0	-0.0091935
SOWAHA	2	0.93159	0.94663	1	15788	0	-2.3032	0.049745	0.068822	0.820419	849	1	-2.3032
HOMEZ	2	0.89552	0.92828	1	15200	0	-2.3422	0.049926	0.068822	0.820419	850	1	-2.3422
STAB2	3	0.91773	0.96503	1	15558	0	-5.3455	0.049972	0.08118	0.820419	851	1	-5.3455
TGFB1I1	2	0.92101	0.93877	1	15607	0	-2.5086	0.049986	0.068822	0.820419	852	1	-2.5086
SMIM4	1	0.94994	0.93095	1	16116	0	-0.033254	0.050056	0.069051	0.820419	853	0	-0.033254
EMID1	2	0.50015	0.74347	1	9232	1	-3.4773	0.050167	0.068822	0.820419	854	1	-3.4773
TSPAN9	1	0.94979	0.93095	1	16115	0	-0.037975	0.05021	0.069051	0.820419	855	0	-0.037975
MRFAP1	1	0.94976	0.93095	1	16114	0	-0.048505	0.050241	0.069051	0.820419	856	0	-0.048505
TOLLIP	2	0.20649	0.51271	1	4797	1	-3.963	0.050287	0.068822	0.820419	857	1	-3.963
TPPP	3	0.015075	0.15203	1	423	2	-8.2395	0.05033	0.08118	0.820419	858	1	-8.2395
PAXIP1	1	0.94967	0.93095	1	16113	0	-0.045037	0.050334	0.069051	0.820419	859	0	-0.045037
FDXACB1	1	0.9496	0.92888	1	16110	0	-0.041289	0.050395	0.071117	0.820419	860	0	-0.041289
C5orf58	1	0.94957	0.92888	1	16109	0	-0.061404	0.050426	0.071117	0.820419	861	0	-0.061404
RBMY1F	1	0.94954	0.92888	1	16107	0	-0.069425	0.050457	0.071117	0.820419	862	0	-0.069425
SLC8B1	1	0.94948	0.92888	1	16105	0	-0.046365	0.050519	0.071117	0.820419	863	0	-0.046365
TXNDC9	2	0.8952	0.92828	1	15196	0	-2.2198	0.050528	0.068822	0.820419	864	1	-2.2198
SUV420H2	2	0.63037	0.80315	1	11042	1	-3.3424	0.050709	0.068822	0.820419	865	1	-3.3424
HYAL3	2	0.83627	0.90583	1	14237	0	-2.8356	0.050889	0.068822	0.820419	866	1	-2.8356
WWC2	1	0.94911	0.92888	1	16101	0	-0.073416	0.05089	0.071117	0.820419	867	0	-0.073416
ZNF709	2	0.89994	0.9305	1	15273	0	-2.3138	0.050949	0.068822	0.820419	868	1	-2.3138
hsa-mir-7849	1	0.94905	0.92888	1	16099	0	-0.060207	0.050951	0.071117	0.820419	869	0	-0.060207
TMEM140	2	0.97676	0.97782	1	16595	0	-0.79559	0.05101	0.068822	0.820419	870	1	-0.79559
UBN1	1	0.94899	0.92888	1	16096	0	-0.099371	0.051013	0.071117	0.820419	871	0	-0.099371
TMCO1	3	0.1083	0.43985	1	2713	2	-9.3604	0.051046	0.08118	0.820419	872	1	-9.3604
SLC5A8	4	0.46136	0.8485	1	8678	2	-6.7132	0.051189	0.082506	0.820419	873	1	-6.7132
SEC24D	3	0.67099	0.8894	1	11630	1	-7.7024	0.051225	0.08118	0.820419	874	1	-7.7024
WIPI2	1	0.94877	0.92888	1	16091	0	-0.12932	0.051229	0.071117	0.820419	875	0	-0.12932
SEMA3C	1	0.94874	0.92888	1	16090	0	-0.089949	0.05126	0.071117	0.820419	876	0	-0.089949
COPS5	1	0.94871	0.92888	1	16088	0	-0.10445	0.051291	0.071117	0.820419	877	0	-0.10445
C3AR1	2	0.90121	0.93152	1	15295	0	-2.178	0.051311	0.068822	0.820419	878	1	-2.178
ANKRD33B	3	0.47409	0.8087	1	8871	2	-8.0692	0.051314	0.08118	0.820419	879	1	-8.0692
hsa-mir-4260	2	0.9939	0.99123	1	16884	0	0.15951	0.051431	0.068822	0.820419	880	1	0.15951
ZC3H4	2	0.86833	0.9181	1	14734	0	-2.6679	0.051551	0.068822	0.820419	881	1	-2.6679
hsa-mir-5192	1	0.9484	0.92888	1	16083	0	-0.11686	0.0516	0.071117	0.820419	882	0	-0.11686
hsa-mir-210	2	0.060435	0.23463	1	1621	1	-4.2779	0.051611	0.068822	0.820419	883	1	-4.2779
AMER3	1	0.94825	0.92888	1	16081	0	-0.1493	0.051754	0.071117	0.820419	884	0	-0.1493
PRR18	3	0.0043028	0.059746	1	130	2	-8.3273	0.051761	0.086539	0.820419	885	1	-8.3273
HIST3H3	3	0.69932	0.8945	1	12042	1	-2.5079	0.05194	0.086539	0.820419	886	1	-2.5079
ZNF566	2	0.66006	0.81375	1	11473	1	-3.2584	0.051972	0.068822	0.820419	887	1	-3.2584
FBXO42	4	0.047478	0.35577	1	1306	3	-9.2936	0.052021	0.082506	0.820419	888	1	-9.2936
CHN1	2	0.51961	0.75279	1	9484	1	-3.6186	0.052032	0.068822	0.820419	889	1	-3.6186
RHOBTB3	1	0.94784	0.92888	1	16076	0	-0.13356	0.052156	0.071117	0.820419	890	0	-0.13356
EIF4EBP2	2	0.92844	0.9447	1	15731	0	-2.3128	0.052213	0.068822	0.820419	891	1	-2.3128
TIMM21	1	0.94778	0.92888	1	16073	0	-0.11825	0.052218	0.071117	0.820419	892	0	-0.11825
MANSC1	2	0.86756	0.91692	1	14717	0	-2.8224	0.052273	0.068822	0.820419	893	1	-2.8224
FBXO39	1	0.94772	0.92888	1	16071	0	-0.15911	0.05228	0.071117	0.820419	894	0	-0.15911
hsa-mir-34a	2	0.86555	0.91692	1	14693	0	-2.945	0.052333	0.068822	0.820419	895	1	-2.945
CLEC9A	2	0.92839	0.9447	1	15729	0	-2.3789	0.052393	0.068822	0.820419	896	1	-2.3789
ANGPTL2	1	0.94754	0.92888	1	16069	0	-0.22734	0.052465	0.071117	0.820419	897	0	-0.22734
C16orf59	2	0.89323	0.92723	1	15158	0	-2.6178	0.052514	0.068822	0.820419	898	1	-2.6178
GRAP	2	0.92646	0.94277	1	15697	0	-1.759	0.052574	0.068822	0.820419	899	1	-1.759
hsa-mir-378d-1	1	0.94732	0.92888	1	16067	0	-0.18292	0.052681	0.071117	0.820419	900	0	-0.18292
AXIN2	2	0.89774	0.92938	1	15235	0	-2.6317	0.052694	0.068822	0.820419	901	1	-2.6317
SLC35E1	1	0.94726	0.92888	1	16066	0	-0.21717	0.052743	0.071117	0.820419	902	0	-0.21717
ADAMTSL2	2	0.82784	0.89938	1	14105	0	-2.3654	0.052754	0.068822	0.820419	903	1	-2.3654
MID1IP1	3	0.75431	0.90905	1	12892	1	-6.38	0.052834	0.086539	0.820419	904	1	-6.38
OR4M1	1	0.94701	0.92888	1	16065	0	-0.21406	0.05299	0.071117	0.820419	905	0	-0.21406
TBC1D30	3	0.91131	0.96161	1	15450	0	-3.4488	0.053013	0.086539	0.820419	906	1	-3.4488
hsa-mir-3909	2	0.99774	0.9952	1	16956	0	0.90794	0.053175	0.076424	0.820419	907	1	0.90794
SQSTM1	2	0.60873	0.79085	1	10700	1	-3.4242	0.053355	0.076424	0.820419	908	1	-3.4242
PCBP3	5	0.14202	0.6235	1	3475	4	-8.1767	0.053417	0.10581	0.820419	909	1	-8.1767
hsa-mir-4661	3	0.78406	0.91771	1	13382	1	-7.3065	0.05346	0.086539	0.820419	910	1	-7.3065
SNTB2	1	0.94648	0.92681	1	16059	0	-0.27195	0.053515	0.073185	0.820419	911	0	-0.27195
DHODH	1	0.94645	0.92681	1	16057	0	-0.2569	0.053546	0.073185	0.820419	912	0	-0.2569
hsa-mir-4481	1	0.94642	0.92681	1	16056	0	-0.27514	0.053577	0.073185	0.820419	913	0	-0.27514
APC	1	0.94639	0.92681	1	16055	0	-0.25706	0.053608	0.073185	0.820419	914	0	-0.25706
FAM24B	3	0.45039	0.79297	1	8521	1	-7.5928	0.053638	0.086539	0.820419	915	1	-7.5928
PIGF	4	0.16288	0.59471	1	3918	3	-7.3982	0.053681	0.082506	0.820419	916	1	-7.3982
ZNF473	3	0.90622	0.95947	1	15363	0	-6.7558	0.053817	0.086539	0.820419	917	1	-6.7558
LBR	2	0.85851	0.9145	1	14592	0	-2.7006	0.053836	0.076424	0.820419	918	1	-2.7006
MED18	2	0.13741	0.42975	1	3373	1	-4.1101	0.053896	0.076424	0.820419	919	1	-4.1101
NFKBID	2	0.89309	0.92723	1	15155	0	-2.5611	0.054016	0.076424	0.820419	920	1	-2.5611
PDX1	1	0.94593	0.92681	1	16049	0	-0.37063	0.054071	0.073185	0.820419	921	0	-0.37063
ZMYND19	2	0.76222	0.86276	1	13019	0	-3.2203	0.054076	0.076424	0.820419	922	1	-3.2203
CCDC64B	1	0.9459	0.92681	1	16048	0	-0.27677	0.054102	0.073185	0.820419	923	0	-0.27677
ANKRD53	1	0.94584	0.92681	1	16047	0	-0.29474	0.054164	0.073185	0.820419	924	0	-0.29474
KRT4	1	0.94581	0.92681	1	16046	0	-0.36146	0.054195	0.073185	0.820419	925	0	-0.36146
SORD	1	0.94574	0.92681	1	16044	0	-0.34317	0.054257	0.073185	0.820419	926	0	-0.34317
TCTE3	3	0.1801	0.57361	1	4258	1	-7.3174	0.054264	0.086539	0.820419	927	1	-7.3174
ST3GAL5	3	0.79838	0.92117	1	13628	1	-1.0312	0.054353	0.086539	0.820419	928	1	-1.0312
hsa-mir-3609	2	0.20158	0.50953	1	4697	1	-4.1122	0.054437	0.076424	0.820419	929	1	-4.1122
MYL12A	2	0.15914	0.4546	1	3827	1	-4.2299	0.054497	0.076424	0.820419	930	1	-4.2299
hsa-mir-378g	1	0.94547	0.92681	1	16038	0	-0.44915	0.054535	0.073185	0.820419	931	0	-0.44915
STAMBP	2	0.38019	0.65914	1	7504	1	-3.6523	0.054557	0.076424	0.820419	932	1	-3.6523
A4GNT	1	0.94537	0.92681	1	16036	0	-0.36147	0.054627	0.073185	0.820419	933	0	-0.36147
ADCY8	4	0.44385	0.84508	1	8434	2	-7.6383	0.054629	0.082506	0.820419	934	1	-7.6383
hsa-mir-4645	2	0.99687	0.99427	1	16941	0	0.63372	0.054677	0.076424	0.820419	935	1	0.63372
GLRX2	2	0.6105	0.79237	1	10731	1	-3.3221	0.054737	0.076424	0.820419	936	1	-3.3221
GRHL2	1	0.94525	0.92681	1	16034	0	-0.32611	0.054751	0.073186	0.820419	937	0	-0.32611
EPN1	3	0.57619	0.85836	1	10251	1	-6.8106	0.054799	0.086539	0.820419	938	1	-6.8106
hsa-mir-8064	1	0.94516	0.92681	1	16032	0	-0.22872	0.054843	0.073186	0.820419	939	0	-0.22872
CYP19A1	2	0.14206	0.43284	1	3477	1	-4.1153	0.054917	0.076424	0.820419	940	1	-4.1153
NRD1	1	0.94497	0.92681	1	16030	0	-0.30839	0.055029	0.073186	0.820419	941	0	-0.30839
FRMD8	3	0.99823	0.99816	1	16961	0	-3.8207	0.055067	0.086539	0.820419	942	1	-3.8207
CAMSAP2	1	0.94488	0.92681	1	16028	0	-0.38303	0.055121	0.073186	0.820419	943	0	-0.38303
GPR45	1	0.94482	0.92681	1	16027	0	-0.31834	0.055183	0.073186	0.820419	944	0	-0.31834
TCOF1	1	0.94479	0.92681	1	16024	0	-0.43743	0.055214	0.073186	0.820419	945	0	-0.43743
STK3	2	0.98775	0.98649	1	16779	0	-1.2279	0.055218	0.076424	0.820419	946	1	-1.2279
UBA1	1	0.94476	0.92681	1	16022	0	-0.54003	0.055245	0.073186	0.820419	947	0	-0.54003
OR10A6	1	0.94472	0.92681	1	16021	0	-0.4879	0.055276	0.073186	0.820419	948	0	-0.4879
ZNHIT3	4	0.4762	0.85329	1	8905	1	-7.4066	0.05534	0.089232	0.820419	949	1	-7.4066
PFN2	2	0.58738	0.78623	1	10390	1	-2.8853	0.055398	0.076424	0.820419	950	1	-2.8853
TAAR1	1	0.94457	0.92681	1	16018	0	-0.30832	0.05543	0.073186	0.820419	951	0	-0.30832
hsa-mir-4508	1	0.94454	0.92681	1	16017	0	-0.48604	0.055461	0.073186	0.820419	952	0	-0.48604
ARF6	3	0.80874	0.9237	1	13786	1	-7.781	0.055513	0.086539	0.820419	953	1	-7.781
TOMM20L	2	0.4799	0.72956	1	8963	1	-3.3475	0.055518	0.076424	0.820419	954	1	-3.3475
hsa-mir-3926-2	1	0.94442	0.92681	1	16015	0	-0.38698	0.055585	0.073186	0.820419	955	0	-0.38698
LRRC70	1	0.94395	0.92469	1	16009	0	-0.48227	0.056048	0.075314	0.820419	956	0	-0.48227
GPER	1	0.94389	0.92469	1	16008	0	-0.45467	0.05611	0.075314	0.820419	957	0	-0.45467
SEC62	1	0.94386	0.92469	1	16007	0	-0.30246	0.056141	0.075314	0.820419	958	0	-0.30246
EFS	1	0.94383	0.92469	1	16006	0	-0.37906	0.056172	0.075314	0.820419	959	0	-0.37906
LDLRAD4	1	0.9438	0.92469	1	16005	0	-0.3148	0.056203	0.075314	0.820419	960	0	-0.3148
SPTB	3	0.4333	0.78469	1	8282	1	-1.0308	0.056227	0.086539	0.820419	961	1	-1.0308
PLA2G4E	2	0.52205	0.7558	1	9520	1	-3.6119	0.056238	0.076425	0.820419	962	1	-3.6119
COG4	1	0.94374	0.92469	1	16003	0	-0.33678	0.056264	0.075314	0.820419	963	0	-0.33678
GPR6	2	0.86657	0.91692	1	14703	0	-2.525	0.056298	0.076425	0.820419	964	1	-2.525
SLC16A13	3	0.63062	0.87723	1	11045	1	-7.6524	0.056316	0.086539	0.820419	965	1	-7.6524
HMX1	1	0.94358	0.92469	1	15998	0	-0.44825	0.056419	0.075314	0.820419	966	0	-0.44825
hsa-mir-9-3	1	0.94352	0.92469	1	15997	0	-0.44565	0.056481	0.075314	0.820419	967	0	-0.44565
CDK3	3	0.69699	0.8945	1	12009	1	-7.0362	0.056494	0.08654	0.820419	968	1	-7.0362
C12orf79	2	0.54183	0.76351	1	9773	1	-3.4794	0.056538	0.076425	0.820419	969	1	-3.4794
TMEM254	1	0.94346	0.92469	1	15996	0	-0.35609	0.056542	0.075314	0.820419	970	0	-0.35609
hsa-mir-337	2	0.83083	0.90066	1	14157	0	-2.8716	0.056658	0.076425	0.820419	971	1	-2.8716
KCNK6	3	0.83802	0.93315	1	14266	1	-6.9478	0.056672	0.08654	0.820419	972	1	-6.9478
CLPSL1	3	0.34931	0.72746	1	7066	1	-7.8848	0.056761	0.08654	0.820419	973	1	-7.8848
HDGFRP2	2	0.78226	0.87318	1	13345	0	-3.0365	0.056778	0.076425	0.820419	974	1	-3.0365
LIMS1	1	0.94318	0.92469	1	15992	0	-0.47711	0.05682	0.075314	0.820419	975	0	-0.47711
SRP72	2	0.67159	0.81683	1	11639	1	-3.3293	0.056958	0.076425	0.820419	976	1	-3.3293
FKBP11	1	0.94303	0.92469	1	15991	0	-0.47932	0.056975	0.075314	0.820419	977	0	-0.47932
PIP5K1C	1	0.94299	0.92469	1	15988	0	-0.43096	0.057006	0.075314	0.820419	978	0	-0.43096
CCNB1	1	0.94296	0.92469	1	15987	0	-0.45117	0.057037	0.075314	0.820419	979	0	-0.45117
LCN8	1	0.9429	0.92469	1	15984	0	-0.65539	0.057098	0.075314	0.820419	980	0	-0.65539
NANOG	2	0.15136	0.44937	1	3652	1	-4.3323	0.057138	0.076425	0.820419	981	1	-4.3323
KLF5	1	0.94284	0.92469	1	15983	0	-0.63127	0.05716	0.075314	0.820419	982	0	-0.63127
DSP	2	0.86782	0.91692	1	14722	0	-2.8148	0.057198	0.076425	0.820419	983	1	-2.8148
RAD21	1	0.94278	0.92469	1	15980	0	-0.39134	0.057222	0.075314	0.820419	984	0	-0.39134
TRIO	1	0.94275	0.92469	1	15979	0	-0.68833	0.057253	0.075314	0.820419	985	0	-0.68833
CDK17	3	0.23176	0.63677	1	5304	2	-8.742	0.057296	0.08654	0.820419	986	1	-8.742
C10orf118	3	0.25955	0.66015	1	5815	2	-8.7695	0.057385	0.08654	0.820419	987	1	-8.7695
TMED1	5	0.86536	0.98041	1	14688	1	-4.9455	0.057401	0.10581	0.820419	988	1	-4.9455
NOLC1	1	0.94256	0.92469	1	15975	0	-0.39731	0.057438	0.075314	0.820419	989	0	-0.39731
H2AFY	2	0.88619	0.92501	1	15041	0	-2.724	0.057438	0.076425	0.820419	990	1	-2.724
PGM1	4	0.75028	0.94788	1	12825	1	-4.7174	0.057469	0.096005	0.820419	991	1	-4.7174
ANKRD20A3	1	0.94247	0.92469	1	15973	0	-0.45228	0.057531	0.075314	0.820419	992	0	-0.45228
NEK3	2	0.93937	0.9522	1	15929	0	-1.5347	0.057558	0.076425	0.820419	993	1	-1.5347
MYT1	1	0.94244	0.92469	1	15972	0	-0.46358	0.057562	0.075314	0.820419	994	0	-0.46358
ESYT1	2	0.0738	0.27758	1	1936	1	-4.3302	0.057618	0.076425	0.820419	995	1	-4.3302
DENND1B	1	0.94238	0.92469	1	15969	0	-0.35009	0.057623	0.075314	0.820419	996	0	-0.35009
UBE2D3	3	0.90996	0.96161	1	15424	0	-7.5273	0.057652	0.08654	0.820419	997	1	-7.5273
NOS2	2	0.91448	0.93673	1	15504	0	-2.1346	0.057738	0.076425	0.820419	998	1	-2.1346
RSPH9	2	0.64332	0.80621	1	11216	1	-3.4123	0.057798	0.076425	0.820419	999	1	-3.4123
LCE1F	1	0.94219	0.92469	1	15968	0	-0.46765	0.057809	0.075314	0.820419	1000	0	-0.46765
IFNGR2	3	0.40012	0.7583	1	7807	1	-7.6627	0.05783	0.08654	0.820419	1001	1	-7.6627
CRAT	1	0.9421	0.92469	1	15967	0	-0.62991	0.057901	0.075314	0.820419	1002	0	-0.62991
hsa-mir-1281	2	0.40845	0.68221	1	7924	1	-3.6035	0.057918	0.076425	0.820419	1003	1	-3.6035
UBE2M	1	0.94207	0.92469	1	15966	0	-0.72091	0.057932	0.075314	0.820419	1004	0	-0.72091
PRAME	1	0.94201	0.92469	1	15965	0	-0.48568	0.057994	0.075314	0.820419	1005	0	-0.48568
FGFR4	1	0.94191	0.92469	1	15963	0	-0.62883	0.058087	0.075314	0.820419	1006	0	-0.62883
NTPCR	4	0.028258	0.27049	1	806	3	-9.4578	0.058178	0.096005	0.820419	1007	1	-9.4578
KANSL1	3	0.72957	0.90566	1	12502	1	-6.7824	0.058187	0.08654	0.820419	1008	1	-6.7824
C21orf59	2	0.46337	0.71574	1	8715	1	-3.7263	0.058278	0.076425	0.820419	1009	1	-3.7263
SMURF1	1	0.94157	0.92469	1	15962	0	-0.54374	0.058427	0.075314	0.820419	1010	0	-0.54374
hsa-mir-216b	2	0.98498	0.98457	1	16740	0	-0.65069	0.058517	0.076425	0.820419	1011	1	-0.65069
ENPP4	2	0.62694	0.80315	1	10984	1	-3.676	0.058577	0.076425	0.820419	1012	1	-3.676
EPRS	1	0.94139	0.92469	1	15959	0	-0.59575	0.058612	0.075314	0.820419	1013	0	-0.59575
RPS6KL1	2	0.7913	0.8804	1	13506	0	-2.9589	0.058637	0.076425	0.820419	1014	1	-2.9589
hsa-mir-3616	1	0.94136	0.92469	1	15958	0	-0.51991	0.058643	0.075314	0.820419	1015	0	-0.51991
GRIN2A	1	0.94123	0.92469	1	15957	0	-0.48719	0.058766	0.075314	0.820419	1016	0	-0.48719
IER5	1	0.94117	0.92469	1	15955	0	-0.86975	0.058828	0.075314	0.820419	1017	0	-0.86975
TRIM62	2	0.89311	0.92723	1	15156	0	-2.7629	0.059177	0.076425	0.820419	1018	1	-2.7629
SCARA3	2	0.14486	0.43783	1	3538	1	-4.0001	0.059237	0.076425	0.820419	1019	1	-4.0001
ANKRD26	1	0.94068	0.92469	1	15951	0	-0.49108	0.059322	0.075314	0.820419	1020	0	-0.49108
ABCB1	3	0.83231	0.93056	1	14181	1	-5.1394	0.059344	0.08654	0.820419	1021	1	-5.1394
AGAP3	1	0.94062	0.92469	1	15949	0	-0.55269	0.059384	0.075314	0.820419	1022	0	-0.55269
PPCS	1	0.94043	0.92469	1	15946	0	-0.77864	0.059569	0.075314	0.820419	1023	0	-0.77864
TUBA1A	3	0.75325	0.90905	1	12876	1	-5.2332	0.059788	0.08654	0.820419	1024	1	-5.2332
DLX6	1	0.94012	0.92272	1	15940	0	-0.7738	0.059878	0.077282	0.820419	1025	0	-0.7738
MTPN	2	0.82299	0.89938	1	14026	0	-3.173	0.060015	0.080245	0.820419	1026	1	-3.173
IP6K3	2	0.59744	0.78781	1	10538	1	-3.7007	0.060075	0.080245	0.820419	1027	1	-3.7007
HNF1A	1	0.93984	0.92067	1	15937	0	-0.95192	0.060156	0.079332	0.820419	1028	0	-0.95192
TMEM88B	3	0.95542	0.97808	1	16222	0	-5.0816	0.060233	0.08654	0.820419	1029	1	-5.0816
hsa-mir-3937	1	0.93975	0.92067	1	15936	0	-0.70652	0.060249	0.079332	0.820419	1030	0	-0.70652
KRT33B	2	0.91804	0.93775	1	15565	0	-1.5775	0.060255	0.080245	0.820419	1031	1	-1.5775
AASDHPPT	4	0.14626	0.56975	1	3571	3	-8.7721	0.060302	0.096006	0.820419	1032	1	-8.7721
AIG1	2	0.1631	0.46338	1	3922	1	-4.3131	0.060315	0.080245	0.820419	1033	1	-4.3131
GIPC3	3	0.1953	0.60293	1	4568	2	-8.9863	0.060322	0.08654	0.820419	1034	1	-8.9863
TRIM44	1	0.93963	0.92067	1	15933	0	-0.6418	0.060373	0.079333	0.820419	1035	0	-0.6418
KIAA1009	3	0.78034	0.91595	1	13314	1	-2.3927	0.060589	0.08654	0.820419	1036	1	-2.3927
hsa-mir-3117	2	0.64236	0.80621	1	11199	1	-3.6038	0.060614	0.080245	0.820419	1037	1	-3.6038
GXYLT2	1	0.93938	0.91867	1	15931	0	-0.28759	0.06062	0.081329	0.820419	1038	0	-0.28759
FAM96B	1	0.93938	0.91867	1	15930	0	-0.28759	0.06062	0.081329	0.820419	1039	0	-0.28759
hsa-mir-5579	2	0.34742	0.63308	1	7045	1	-4.0721	0.060734	0.080245	0.820419	1040	1	-4.0721
KRTAP13-1	3	0.28332	0.68441	1	6154	2	-8.1634	0.060766	0.08654	0.820419	1041	1	-8.1634
THSD1	3	0.16359	0.54772	1	3934	1	-6.2608	0.060855	0.08654	0.820419	1042	1	-6.2608
SNAP47	1	0.93904	0.91867	1	15924	0	-0.65614	0.060959	0.081329	0.820419	1043	0	-0.65614
C12orf50	2	0.87699	0.9239	1	14881	0	-2.7536	0.060974	0.080245	0.820419	1044	1	-2.7536
HCFC1R1	3	0.9692	0.98204	1	16456	0	-6.7423	0.061033	0.08654	0.820419	1045	1	-6.7423
hsa-mir-4490	2	0.65608	0.81224	1	11411	1	-3.5664	0.061033	0.080245	0.820419	1046	1	-3.5664
TMEM63B	1	0.93895	0.91867	1	15921	0	-0.80531	0.061052	0.081329	0.820419	1047	0	-0.80531
GIP	2	0.82689	0.89938	1	14092	0	-3.3187	0.061093	0.080245	0.820419	1048	1	-3.3187
IFT46	2	0.27784	0.58548	1	6077	1	-4.1777	0.061153	0.080245	0.820419	1049	1	-4.1777
hsa-mir-3689b	1	0.93882	0.91867	1	15918	0	-0.45058	0.061176	0.081329	0.820419	1050	0	-0.45058
HCFC1	1	0.93876	0.91867	1	15915	0	-0.9412	0.061237	0.081329	0.820419	1051	0	-0.9412
WDR6	2	0.72612	0.83986	1	12449	1	-3.4087	0.061333	0.080245	0.820419	1052	1	-3.4087
UBA6	1	0.93858	0.91867	1	15914	0	-0.71147	0.061423	0.081329	0.820419	1053	0	-0.71147
hsa-mir-3194	1	0.93852	0.91661	1	15912	0	-1.0971	0.061485	0.08339	0.820419	1054	0	-1.0971
NAT16	1	0.93842	0.91661	1	15909	0	-0.5367	0.061577	0.08339	0.820419	1055	0	-0.5367
ARHGEF26	2	0.58774	0.78623	1	10399	1	-3.8128	0.061632	0.080245	0.820419	1056	1	-3.8128
PCDHA10	1	0.93833	0.91661	1	15908	0	-0.90309	0.06167	0.08339	0.820419	1057	0	-0.90309
BBS2	2	0.92457	0.94078	1	15665	0	-2.5235	0.061692	0.080245	0.820419	1058	1	-2.5235
RPL37	1	0.93824	0.91661	1	15907	0	-0.63138	0.061763	0.08339	0.820419	1059	0	-0.63138
TNFSF10	1	0.93821	0.91661	1	15905	0	-0.54119	0.061793	0.08339	0.820419	1060	0	-0.54119
hsa-mir-6723	1	0.93818	0.91661	1	15904	0	-0.57544	0.061824	0.08339	0.820419	1061	0	-0.57544
SLC22A3	4	0.52831	0.87413	1	9596	2	-7.3051	0.061952	0.10266	0.820419	1062	1	-7.3051
C15orf26	2	0.50794	0.74502	1	9326	1	-3.8034	0.061991	0.080245	0.820419	1063	1	-3.8034
PPP4R1	1	0.93799	0.91661	1	15902	0	-0.64177	0.06201	0.08339	0.820419	1064	0	-0.64177
CLDN23	3	0.34506	0.72625	1	7009	1	-1.7119	0.06201	0.091868	0.820419	1065	1	-1.7119
SLC26A8	3	0.34471	0.72625	1	7003	2	-7.7177	0.062188	0.091868	0.820419	1066	1	-7.7177
OR51A2	1	0.93774	0.91661	1	15900	0	-0.68239	0.062257	0.08339	0.820419	1067	0	-0.68239
PLG	2	0.99401	0.99161	1	16886	0	-0.38279	0.06241	0.080246	0.820419	1068	1	-0.38279
ITIH6	2	0.50867	0.74658	1	9335	1	-3.6877	0.062529	0.080246	0.820419	1069	1	-3.6877
CHD2	1	0.93743	0.91661	1	15894	0	-0.73046	0.062566	0.08339	0.820419	1070	0	-0.73046
ZNF100	2	0.92903	0.9457	1	15744	0	-2.5988	0.062589	0.080246	0.820419	1071	1	-2.5988
FCGRT	3	0.21874	0.62497	1	5034	2	-8.9047	0.062631	0.091868	0.820419	1072	1	-8.9047
LEMD3	2	0.8766	0.92279	1	14874	0	-2.994	0.062709	0.080246	0.820419	1073	1	-2.994
CLCN3	3	0.6113	0.86868	1	10745	1	-5.2359	0.06272	0.091868	0.820419	1074	1	-5.2359
hsa-mir-519e	1	0.93725	0.91661	1	15892	0	-1.3502	0.062751	0.08339	0.820419	1075	0	-1.3502
SSH2	3	0.60385	0.86609	1	10628	1	-7.8119	0.062898	0.091868	0.820419	1076	1	-7.8119
MAGOHB	1	0.93703	0.91661	1	15887	0	-0.57865	0.062967	0.08339	0.820419	1077	0	-0.57865
ATP8A1	1	0.93697	0.91661	1	15885	0	-0.81144	0.063029	0.08339	0.820419	1078	0	-0.81144
SLC4A1AP	1	0.93691	0.91661	1	15883	0	-0.98178	0.063091	0.08339	0.820419	1079	0	-0.98178
C12orf54	1	0.93679	0.91661	1	15880	0	-0.90541	0.063214	0.08339	0.820419	1080	0	-0.90541
WDR54	3	0.2554	0.66015	1	5755	2	-8.7823	0.063253	0.091869	0.820419	1081	1	-8.7823
PIGL	2	0.98386	0.98404	1	16718	0	-1.1552	0.063307	0.080246	0.820419	1082	1	-1.1552
DDX59	1	0.93669	0.91661	1	15878	0	-1.1485	0.063307	0.08339	0.820419	1083	0	-1.1485
KIF19	3	0.25688	0.66015	1	5776	1	-3.8043	0.063607	0.091869	0.820419	1084	1	-3.8043
ZNF674	1	0.93629	0.91661	1	15874	0	-0.7616	0.063709	0.08339	0.820419	1085	0	-0.7616
hsa-mir-3149	1	0.93623	0.91661	1	15871	0	-0.6926	0.06377	0.08339	0.820419	1086	0	-0.6926
PTF1A	2	0.99208	0.98877	1	16846	0	-0.91157	0.063785	0.080246	0.820419	1087	1	-0.91157
PRSS3	1	0.9362	0.91661	1	15870	0	-0.83538	0.063801	0.08339	0.820419	1088	0	-0.83538
FAM208B	1	0.93617	0.91661	1	15869	0	-0.74751	0.063832	0.08339	0.820419	1089	0	-0.74751
NKG7	2	0.76981	0.86729	1	13145	0	-3.3567	0.063845	0.080246	0.820419	1090	1	-3.3567
ARL15	2	0.90272	0.93152	1	15315	0	-2.9197	0.063964	0.080246	0.820419	1091	1	-2.9197
LYVE1	1	0.93598	0.91661	1	15868	0	-0.9299	0.064017	0.08339	0.820419	1092	0	-0.9299
PIP4K2B	3	0.19471	0.60293	1	4557	2	-7.2459	0.064051	0.091869	0.820419	1093	1	-7.2459
PTTG2	4	0.27503	0.73993	1	6037	2	-7.2881	0.06407	0.10266	0.820419	1094	1	-7.2881
FKBP2	3	0.56224	0.85401	1	10078	1	-5.0969	0.06414	0.091869	0.820419	1095	1	-5.0969
NHLRC4	1	0.93586	0.91661	1	15864	0	-0.85966	0.064141	0.08339	0.820419	1096	0	-0.85966
hsa-mir-550a-1	4	0.21882	0.67889	1	5038	3	-5.8873	0.064306	0.1093	0.820419	1097	1	-5.8873
LRRC43	1	0.93567	0.91661	1	15861	0	-0.94993	0.064326	0.08339	0.820419	1098	0	-0.94993
MTRNR2L3	2	0.97876	0.97902	1	16624	0	-2.0335	0.064383	0.080246	0.820419	1099	1	-2.0335
RAB2B	1	0.93561	0.91661	1	15859	0	-0.53419	0.064388	0.08339	0.820419	1100	0	-0.53419
TCP11L2	4	0.15497	0.5799	1	3730	1	-6.0405	0.064423	0.1093	0.820419	1101	1	-6.0405
SNX31	3	0.86186	0.93999	1	14644	1	-7.8662	0.064494	0.091869	0.820419	1102	1	-7.8662
ERI2	1	0.93549	0.91661	1	15857	0	-0.79714	0.064512	0.08339	0.820419	1103	0	-0.79714
ACVR1	4	0.89648	0.96966	1	15218	1	-3.6404	0.064541	0.1093	0.820419	1104	1	-3.6404
ELOVL4	2	0.753	0.85977	1	12873	0	-3.3713	0.064562	0.084067	0.820419	1105	1	-3.3713
NAT2	3	0.014065	0.14766	1	398	2	-8.0186	0.064583	0.091869	0.820419	1106	1	-8.0186
PROL1	1	0.9354	0.91661	1	15855	0	-1.1082	0.064604	0.08339	0.820419	1107	0	-1.1082
BAHD1	1	0.93533	0.91661	1	15854	0	-0.73607	0.064666	0.08339	0.820419	1108	0	-0.73607
ATP2B3	1	0.9353	0.91661	1	15852	0	-1.1693	0.064697	0.08339	0.820419	1109	0	-1.1693
CPSF4L	2	0.76309	0.86276	1	13032	0	-3.3828	0.064741	0.084067	0.820419	1110	1	-3.3828
ZNF711	2	0.56941	0.77412	1	10173	1	-3.8575	0.064801	0.084067	0.820419	1111	1	-3.8575
TRAPPC6A	3	0.77079	0.91425	1	13162	1	-7.6453	0.064937	0.091869	0.820419	1112	1	-7.6453
BAX	1	0.93506	0.91661	1	15847	0	-0.77905	0.064944	0.08339	0.820419	1113	0	-0.77905
COL4A1	1	0.93493	0.91661	1	15846	0	-0.87654	0.065068	0.08339	0.820419	1114	0	-0.87654
CCDC71	2	0.079618	0.29358	1	2078	1	-4.5823	0.0651	0.087913	0.820419	1115	1	-4.5823
PANX2	2	0.97953	0.9796	1	16635	0	-1.7872	0.065159	0.087913	0.820419	1116	1	-1.7872
WDR25	1	0.93475	0.91661	1	15844	0	-1.5615	0.065253	0.08339	0.820419	1117	0	-1.5615
HCRTR1	1	0.93472	0.91661	1	15843	0	-0.71117	0.065284	0.08339	0.820419	1118	0	-0.71117
CLTA	1	0.93459	0.91661	1	15839	0	-0.72871	0.065407	0.08339	0.820419	1119	0	-0.72871
RPRM	1	0.93456	0.91661	1	15838	0	-0.77558	0.065438	0.08339	0.820419	1120	0	-0.77558
LETMD1	3	0.82216	0.92801	1	14007	1	-5.5709	0.065646	0.097336	0.820419	1121	1	-5.5709
IRF4	1	0.93435	0.91661	1	15836	0	-0.91769	0.065655	0.08339	0.820419	1122	0	-0.91769
AASS	1	0.93431	0.91661	1	15835	0	-1.0302	0.065685	0.08339	0.820419	1123	0	-1.0302
THEG	2	0.38615	0.66531	1	7597	1	-4.0797	0.065697	0.087913	0.820419	1124	1	-4.0797
TBC1D26	3	0.60545	0.86609	1	10658	1	-7.9224	0.065735	0.097336	0.820419	1125	1	-7.9224
FAM161A	2	0.90391	0.93152	1	15331	0	-2.8197	0.065876	0.087913	0.820419	1126	1	-2.8197
IFNB1	1	0.93401	0.91661	1	15833	0	-0.73442	0.065994	0.08339	0.820419	1127	0	-0.73442
LRRC52	3	0.71693	0.89962	1	12303	1	-7.8127	0.066	0.097336	0.820419	1128	1	-7.8127
PNPLA1	2	0.55573	0.76652	1	9984	1	-3.6602	0.066055	0.087913	0.820419	1129	1	-3.6602
hsa-mir-4329	2	0.96534	0.96776	1	16391	0	-2.2366	0.066115	0.087913	0.820419	1130	1	-2.2366
ALG13	1	0.93385	0.91661	1	15828	0	-1.0461	0.066149	0.08339	0.820419	1131	0	-1.0461
GPRC6A	2	0.9611	0.9663	1	16301	0	-2.1782	0.066175	0.087914	0.820419	1132	1	-2.1782
MAP3K2	3	0.41701	0.77224	1	8046	2	-8.2557	0.066177	0.097336	0.820419	1133	1	-8.2557
hsa-mir-4725	1	0.93376	0.91661	1	15826	0	-1.3966	0.066241	0.08339	0.820419	1134	0	-1.3966
SEMA4D	3	0.43101	0.77954	1	8248	1	-3.3761	0.066443	0.097336	0.820419	1135	1	-3.3761
hsa-mir-6857	1	0.93354	0.91661	1	15821	0	-0.75017	0.066458	0.08339	0.820419	1136	0	-0.75017
TMEM109	1	0.93348	0.91661	1	15820	0	-0.80657	0.066519	0.08339	0.820419	1137	0	-0.80657
TMEM167B	1	0.93326	0.91661	1	15818	0	-1.2251	0.066736	0.08339	0.820419	1138	0	-1.2251
KCNK12	1	0.93323	0.91661	1	15817	0	-0.98325	0.066767	0.08339	0.820419	1139	0	-0.98325
WASF2	3	0.21009	0.61612	1	4873	1	-0.67883	0.066797	0.10267	0.820419	1140	1	-0.67883
AS3MT	4	0.86895	0.96506	1	14750	1	-7.611	0.066889	0.1093	0.820419	1141	1	-7.611
HK1	2	0.64605	0.80771	1	11260	1	-3.7138	0.06695	0.087914	0.820419	1142	1	-3.7138
2018-03-02	3	0.4218	0.77604	1	8109	2	-7.9847	0.066974	0.10267	0.820419	1143	1	-7.9847
MMP17	1	0.93299	0.91661	1	15816	0	-0.85043	0.067014	0.08339	0.820419	1144	0	-0.85043
CFB	2	0.78842	0.87896	1	13461	0	-3.3281	0.06707	0.087914	0.820419	1145	1	-3.3281
UGT2B10	2	0.63911	0.80621	1	11158	1	-3.6657	0.067308	0.087914	0.820419	1146	1	-3.6657
ANAPC13	4	0.31144	0.78403	1	6562	1	-4.0362	0.067358	0.1093	0.820419	1147	1	-4.0362
MLH3	1	0.93262	0.91661	1	15808	0	-1.1055	0.067384	0.08339	0.820419	1148	0	-1.1055
C5orf45	1	0.93255	0.91661	1	15805	0	-0.80287	0.067446	0.08339	0.820419	1149	0	-0.80287
SPIN1	1	0.93252	0.91661	1	15804	0	-0.73943	0.067477	0.08339	0.820419	1150	0	-0.73943
NDUFAF1	2	0.94257	0.9557	1	15976	0	-2.2425	0.067547	0.091776	0.820419	1151	1	-2.2425
AIM1	1	0.9324	0.91661	1	15800	0	-0.83182	0.067601	0.08339	0.820419	1152	0	-0.83182
BNIP3	1	0.93215	0.91661	1	15797	0	-1.5601	0.067848	0.08339	0.820419	1153	0	-1.5601
AARS	2	0.65114	0.81074	1	11335	1	-3.5523	0.067965	0.095747	0.820419	1154	1	-3.5523
hsa-mir-4774	2	0.62122	0.79698	1	10892	1	-3.8684	0.068084	0.095747	0.820419	1155	1	-3.8684
TMEM52B	3	0.98037	0.98659	1	16656	0	-4.7226	0.068212	0.10267	0.820419	1156	1	-4.7226
CDHR2	1	0.93175	0.91661	1	15791	0	-1.1007	0.068249	0.08339	0.820419	1157	0	-1.1007
KRT13	2	0.78591	0.87755	1	13415	0	-3.0076	0.068263	0.095747	0.820419	1158	1	-3.0076
SYCP2L	1	0.93169	0.91661	1	15790	0	-1.6598	0.068311	0.08339	0.820419	1159	0	-1.6598
MXRA5	1	0.93163	0.91661	1	15789	0	-0.83031	0.068373	0.08339	0.820419	1160	0	-0.83031
ZNF791	2	0.83809	0.90836	1	14268	0	-2.3374	0.068501	0.095747	0.820419	1161	1	-2.3374
IFT88	3	0.87132	0.9468	1	14791	1	-1.7649	0.068566	0.10267	0.820419	1162	1	-1.7649
LRRC42	1	0.93141	0.91661	1	15786	0	-1.4744	0.068589	0.08339	0.820419	1163	0	-1.4744
C2CD4D	1	0.93135	0.91661	1	15785	0	-1.2265	0.068651	0.08339	0.820419	1164	0	-1.2265
COL18A1	2	0.2283	0.54202	1	5227	1	-4.2706	0.06868	0.095747	0.820419	1165	1	-4.2706
ZNF835	2	0.84877	0.91209	1	14444	0	-3.1728	0.06874	0.095747	0.820419	1166	1	-3.1728
RGMA	3	0.82762	0.92887	1	14100	1	-7.4896	0.068742	0.10267	0.820419	1167	1	-7.4896
C14orf119	1	0.93126	0.91661	1	15784	0	-1.4541	0.068743	0.08339	0.820419	1168	0	-1.4541
BRPF1	1	0.93123	0.91661	1	15783	0	-1.2146	0.068774	0.08339	0.820419	1169	0	-1.2146
RNF139	2	0.93999	0.9522	1	15938	0	-2.352	0.068799	0.095747	0.820419	1170	1	-2.352
FAM127B	3	0.94445	0.97455	1	16016	0	-4.7377	0.068831	0.10267	0.820419	1171	1	-4.7377
CCDC86	2	0.93256	0.94663	1	15806	0	-2.4767	0.068919	0.099513	0.820419	1172	1	-2.4767
TMEM117	3	0.59112	0.86179	1	10453	1	-6.0765	0.068919	0.10267	0.820419	1173	1	-6.0765
SGPP1	1	0.93104	0.91661	1	15780	0	-1.4155	0.06896	0.08339	0.820419	1174	0	-1.4155
hsa-mir-3908	1	0.93101	0.91661	1	15779	0	-1.0014	0.068991	0.08339	0.820419	1175	0	-1.0014
hsa-mir-5190	3	0.20916	0.61612	1	4848	2	-8.9354	0.069007	0.10267	0.820419	1176	1	-8.9354
ARHGAP25	2	0.9326	0.94663	1	15807	0	-2.6766	0.069097	0.10325	0.820419	1177	1	-2.6766
GPR113	2	0.94887	0.96159	1	16093	0	-2.5333	0.069157	0.10325	0.820419	1178	1	-2.5333
WBP2NL	3	0.25292	0.65588	1	5718	1	-5.0109	0.069184	0.10267	0.820419	1179	1	-5.0109
hsa-mir-4307	1	0.93079	0.91661	1	15777	0	-1.3012	0.069207	0.08339	0.820419	1180	0	-1.3012
HAUS2	2	0.51502	0.75123	1	9433	1	-3.9511	0.069276	0.10325	0.820419	1181	1	-3.9511
hsa-mir-340	1	0.93058	0.91661	1	15773	0	-1.3027	0.069423	0.08339	0.820419	1182	0	-1.3027
ZNF878	4	0.65869	0.92467	1	11450	2	-6.7978	0.069467	0.11585	0.820419	1183	1	-6.7978
ATOH8	1	0.93052	0.91661	1	15771	0	-1.1686	0.069485	0.08339	0.820419	1184	0	-1.1686
ETV4	3	0.79174	0.92032	1	13514	1	-5.4359	0.069537	0.10267	0.820419	1185	1	-5.4359
NUFIP2	1	0.93045	0.91661	1	15770	0	-0.82077	0.069547	0.08339	0.820419	1186	0	-0.82077
TRPV5	2	0.38654	0.66531	1	7606	1	-4.2382	0.069574	0.10325	0.820419	1187	1	-4.2382
DCAF12	1	0.93042	0.91661	1	15768	0	-1.0762	0.069577	0.08339	0.820419	1188	0	-1.0762
hsa-mir-612	1	0.9303	0.91661	1	15764	0	-1.396	0.069701	0.08339	0.820419	1189	0	-1.396
FUNDC1	1	0.93024	0.91661	1	15760	0	-0.94986	0.069763	0.08339	0.820419	1190	0	-0.94986
DNAJC17	2	0.63176	0.80315	1	11057	1	-3.7133	0.069813	0.10325	0.820419	1191	1	-3.7133
RIMS4	2	0.95777	0.96479	1	16261	0	-2.5346	0.069932	0.10325	0.820419	1192	1	-2.5346
CHRNA3	2	0.24331	0.56699	1	5538	1	-4.3379	0.069991	0.10325	0.820419	1193	1	-4.3379
SEC23B	1	0.9299	0.91661	1	15757	0	-0.91279	0.070103	0.08339	0.820419	1194	0	-0.91279
ZEB1	3	0.077737	0.35693	1	2030	2	-9.5215	0.070156	0.10267	0.820419	1195	1	-9.5215
FBXO25	1	0.92974	0.91661	1	15756	0	-0.99273	0.070257	0.08339	0.820419	1196	0	-0.99273
PLAGL2	4	0.61408	0.90768	1	10784	1	-4.5883	0.070403	0.11585	0.820419	1197	1	-4.5883
ANKRD18B	2	0.64307	0.80621	1	11208	1	-3.6181	0.070408	0.10325	0.820419	1198	1	-3.6181
ADAMTS20	1	0.92959	0.91661	1	15753	0	-0.86999	0.070411	0.08339	0.820419	1199	0	-0.86999
B9D1	5	0.012349	0.19932	1	349	3	-9.8963	0.070439	0.1216	0.820419	1200	1	-9.8963
C2orf15	3	0.93157	0.97062	1	15787	0	-4.843	0.070509	0.10267	0.820419	1201	1	-4.843
ZNF468	2	0.70868	0.83675	1	12183	1	-3.6218	0.070527	0.10325	0.820419	1202	1	-3.6218
EML4	1	0.92947	0.91661	1	15751	0	-1.433	0.070535	0.08339	0.820419	1203	0	-1.433
SPN	3	0.69351	0.89363	1	11957	1	-0.61102	0.070597	0.10267	0.820419	1204	1	-0.61102
KLHDC8A	1	0.92922	0.91661	1	15747	0	-1.3958	0.070782	0.08339	0.820419	1205	0	-1.3958
hsa-mir-507	1	0.92903	0.91661	1	15745	0	-0.92472	0.070967	0.08339	0.820419	1206	0	-0.92472
GAB2	2	0.62377	0.79854	1	10932	1	-3.7488	0.071004	0.10325	0.820419	1207	1	-3.7488
hsa-mir-3138	3	0.98402	0.98886	1	16723	0	-2.5983	0.071038	0.10267	0.820419	1208	1	-2.5983
PFDN2	1	0.92888	0.91661	1	15741	0	-1.171	0.071122	0.08339	0.820419	1209	0	-1.171
CXorf66	3	0.15119	0.52973	1	3651	1	-7.9	0.071126	0.10267	0.820419	1210	1	-7.9
MYL3	2	0.43476	0.69898	1	8301	1	-3.9553	0.071242	0.10325	0.820419	1211	1	-3.9553
OVCA2	1	0.92875	0.91661	1	15738	0	-1.6756	0.071245	0.08339	0.820419	1212	0	-1.6756
ADAM20	3	0.21412	0.61753	1	4945	1	-2.8663	0.071303	0.10267	0.820419	1213	1	-2.8663
SYT9	2	0.010444	0.071591	1	306	1	-5.2141	0.071361	0.10325	0.820419	1214	1	-5.2141
PCYT2	1	0.92863	0.91661	1	15735	0	-1.5575	0.071369	0.08339	0.820419	1215	0	-1.5575
RNF114	1	0.9286	0.91661	1	15733	0	-1.2495	0.0714	0.08339	0.820419	1216	0	-1.2495
MPPED1	3	0.14903	0.52838	1	3611	1	-1.8393	0.071567	0.10267	0.820419	1217	1	-1.8393
SRRM5	2	0.99154	0.98877	1	16835	0	-0.61005	0.071599	0.10325	0.820419	1218	1	-0.61005
RPS12	1	0.92838	0.91661	1	15728	0	-1.2354	0.071616	0.08339	0.820419	1219	0	-1.2354
ALS2	2	0.95574	0.96479	1	16233	0	-2.413	0.071659	0.10325	0.820419	1220	1	-2.413
hsa-mir-498	1	0.92829	0.91452	1	15727	0	-1.3414	0.071709	0.08548	0.820419	1221	0	-1.3414
CD37	2	0.97478	0.97532	1	16560	0	-1.7182	0.071718	0.10325	0.820419	1222	1	-1.7182
PHF1	1	0.92826	0.91452	1	15726	0	-1.171	0.07174	0.08548	0.820419	1223	0	-1.171
RNF103	3	0.40904	0.76549	1	7933	2	-8.0123	0.071744	0.10267	0.820419	1224	1	-8.0123
hsa-mir-6077-1	1	0.9282	0.91452	1	15725	0	-1.5156	0.071801	0.08548	0.820419	1225	0	-1.5156
SPSB1	2	0.93718	0.95133	1	15891	0	-2.6968	0.071837	0.10325	0.820419	1226	1	-2.6968
PURB	1	0.92811	0.91452	1	15724	0	-1.1806	0.071894	0.08548	0.820419	1227	0	-1.1806
TRHR	4	0.94262	0.98116	1	15977	0	-7.6408	0.071923	0.11585	0.820419	1228	1	-7.6408
CD33	1	0.92804	0.91452	1	15722	0	-2.2229	0.071956	0.08548	0.820419	1229	0	-2.2229
SCD	2	0.49415	0.74032	1	9155	1	-4.0148	0.072016	0.10325	0.820419	1230	1	-4.0148
FMO3	1	0.92783	0.91452	1	15719	0	-1.1785	0.072172	0.08548	0.820419	1231	0	-1.1785
TANGO6	2	0.40712	0.68064	1	7902	1	-4.0765	0.072194	0.10325	0.820419	1232	1	-4.0765
MYBPC2	1	0.92777	0.91452	1	15718	0	-1.2503	0.072234	0.08548	0.820419	1233	0	-1.2503
CXorf64	4	0.78587	0.95258	1	13412	1	-5.3835	0.072273	0.11585	0.820419	1234	1	-5.3835
PCNXL3	2	0.75995	0.86276	1	12986	0	-3.1197	0.072432	0.10325	0.820419	1235	1	-3.1197
IGFLR1	1	0.92752	0.91452	1	15717	0	-1.53	0.072481	0.08548	0.820419	1236	0	-1.53
GGTLC1	2	0.66222	0.8153	1	11499	1	-3.7695	0.072551	0.10325	0.820419	1237	1	-3.7695
hsa-mir-2116	1	0.9274	0.91452	1	15715	0	-1.124	0.072605	0.08548	0.820419	1238	0	-1.124
TAS2R19	2	0.74816	0.85977	1	12796	1	-2.9267	0.072611	0.10325	0.820419	1239	1	-2.9267
SIRPD	5	0.43271	0.87861	1	8274	2	-5.7281	0.072622	0.1216	0.820419	1240	1	-5.7281
CDK5R1	1	0.9273	0.91452	1	15714	0	-2.2418	0.072697	0.08548	0.820419	1241	0	-2.2418
DGAT1	2	0.55848	0.76652	1	10026	1	-3.7905	0.07273	0.10325	0.820419	1242	1	-3.7905
CDH9	3	0.80047	0.92117	1	13654	1	-0.48971	0.072801	0.10267	0.820419	1243	1	-0.48971
FKBP6	1	0.92718	0.91452	1	15712	0	-2.1818	0.072821	0.08548	0.820419	1244	0	-2.1818
XKRX	1	0.92702	0.91452	1	15710	0	-1.4373	0.072975	0.085481	0.820419	1245	0	-1.4373
CD40	3	0.58836	0.86008	1	10408	1	-4.1399	0.072978	0.10267	0.820419	1246	1	-4.1399
hsa-mir-188	2	0.28025	0.58697	1	6114	1	-4.3687	0.073027	0.10325	0.820419	1247	1	-4.3687
CAPN2	1	0.92684	0.91452	1	15706	0	-1.2958	0.073161	0.085481	0.820419	1248	0	-1.2958
PPID	2	0.97298	0.97469	1	16526	0	-2.0182	0.073206	0.10325	0.820419	1249	1	-2.0182
IQSEC3	1	0.92672	0.91452	1	15705	0	-1.4073	0.073284	0.085481	0.820419	1250	0	-1.4073
SHE	1	0.92662	0.91452	1	15703	0	-2.13	0.073377	0.085481	0.820419	1251	0	-2.13
SPRED1	1	0.92659	0.91452	1	15702	0	-1.1727	0.073408	0.085481	0.820419	1252	0	-1.1727
GJB4	1	0.92656	0.91452	1	15701	0	-1.5051	0.073439	0.085481	0.820419	1253	0	-1.5051
CDKL4	2	0.72495	0.83986	1	12431	1	-3.6916	0.073503	0.10325	0.820419	1254	1	-3.6916
ZDHHC15	3	0.45281	0.79396	1	8561	1	-2.1572	0.073506	0.10267	0.820419	1255	1	-2.1572
hsa-mir-548u	1	0.92647	0.91452	1	15698	0	-1.336	0.073531	0.085481	0.820419	1256	0	-1.336
SULT1A1	1	0.92647	0.91452	1	15699	0	-1.336	0.073531	0.085481	0.820419	1257	0	-1.336
USP46	1	0.92641	0.91452	1	15696	0	-1.4243	0.073593	0.085481	0.820419	1258	0	-1.4243
UBE2V1	1	0.92638	0.91452	1	15695	0	-1.2659	0.073624	0.085481	0.820419	1259	0	-1.2659
ARMC9	1	0.92635	0.91452	1	15694	0	-1.8193	0.073655	0.085481	0.820419	1260	0	-1.8193
MTSS1L	4	0.67467	0.93305	1	11686	2	-6.8781	0.073674	0.11585	0.820419	1261	1	-6.8781
HNRNPA2B1	2	0.78616	0.87755	1	13416	0	-2.9691	0.073741	0.10325	0.820419	1262	1	-2.9691
hsa-mir-4652	1	0.92625	0.91452	1	15691	0	-2.3396	0.073747	0.085481	0.820419	1263	0	-2.3396
hsa-mir-483	1	0.92622	0.91452	1	15690	0	-2.3415	0.073778	0.085481	0.820419	1264	0	-2.3415
EN1	2	0.92475	0.94078	1	15670	0	-1.8971	0.073919	0.10325	0.820419	1265	1	-1.8971
CYP7A1	1	0.92601	0.91252	1	15684	0	-0.9381	0.073995	0.087477	0.820419	1266	0	-0.9381
SCN4A	2	0.55023	0.76501	1	9897	1	-3.9309	0.074038	0.10325	0.820419	1267	1	-3.9309
NXPE1	4	0.10999	0.49798	1	2741	1	-4.7904	0.074141	0.11585	0.820419	1268	1	-4.7904
GEMIN4	1	0.92585	0.91252	1	15682	0	-0.9578	0.074149	0.087477	0.820419	1269	0	-0.9578
TOPBP1	3	0.93044	0.9688	1	15769	0	-3.6254	0.074211	0.10267	0.820419	1270	1	-3.6254
SLC25A1	1	0.92573	0.91252	1	15680	0	-1.5557	0.074273	0.087477	0.820419	1271	0	-1.5557
HVCN1	2	0.29842	0.59934	1	6369	1	-4.2405	0.074276	0.1071	0.820419	1272	1	-4.2405
OSTM1	2	0.87264	0.91932	1	14807	0	-3.3256	0.074335	0.1071	0.820419	1273	1	-3.3256
C19orf71	2	0.95725	0.96479	1	16248	0	-2.3139	0.074514	0.1071	0.820419	1274	1	-2.3139
LMOD1	3	0.076167	0.35569	1	1983	2	-9.5318	0.074563	0.10267	0.820419	1275	1	-9.5318
HIPK2	2	0.34817	0.63308	1	7058	1	-4.3518	0.074573	0.1071	0.820419	1276	1	-4.3518
EFNB2	1	0.92542	0.91252	1	15678	0	-1.6918	0.074581	0.087477	0.820419	1277	0	-1.6918
ZBTB9	2	0.57797	0.78016	1	10268	1	-3.919	0.074633	0.1071	0.820419	1278	1	-3.919
hsa-mir-6072	2	0.92634	0.94277	1	15693	0	-2.0638	0.074751	0.1071	0.820419	1279	1	-2.0638
DCTN2	1	0.9252	0.91252	1	15676	0	-1.084	0.074798	0.087477	0.820419	1280	0	-1.084
MKRN3	2	0.58778	0.78623	1	10400	1	-3.9187	0.074811	0.1071	0.820419	1281	1	-3.9187
POFUT1	3	0.82933	0.92972	1	14134	1	-6.5734	0.074915	0.10267	0.820419	1282	1	-6.5734
AHCYL1	1	0.92489	0.91252	1	15672	0	-1.967	0.075107	0.087477	0.820419	1283	0	-1.967
RNASE7	2	0.91132	0.9357	1	15451	0	-2.6741	0.075108	0.10711	0.820419	1284	1	-2.6741
hsa-mir-3689c	2	0.96339	0.96703	1	16344	0	-2.2049	0.075167	0.10711	0.820419	1285	1	-2.2049
OSGIN2	4	0.4266	0.83603	1	8185	2	-6.8138	0.07519	0.11585	0.820419	1286	1	-6.8138
C6orf99	1	0.92471	0.91252	1	15669	0	-2.0308	0.075292	0.087477	0.820419	1287	0	-2.0308
HAVCR2	1	0.92462	0.91048	1	15666	0	-1.2018	0.075385	0.089517	0.820419	1288	0	-1.2018
C5orf55	1	0.92455	0.91048	1	15664	0	-1.0655	0.075446	0.089517	0.820419	1289	0	-1.0655
POLR1D	4	0.96435	0.98853	1	16369	0	-7.036	0.075539	0.11585	0.820419	1290	1	-7.036
hsa-mir-323b	1	0.9244	0.91048	1	15663	0	-1.1336	0.075601	0.089517	0.820419	1291	0	-1.1336
NLGN3	1	0.92431	0.91048	1	15661	0	-2.367	0.075693	0.089517	0.820419	1292	0	-2.367
CLPTM1L	1	0.92412	0.91048	1	15659	0	-1.7441	0.075879	0.089517	0.820419	1293	0	-1.7441
C10orf129	3	0.19549	0.60293	1	4574	2	-9.0839	0.076058	0.10267	0.820419	1294	1	-9.0839
JPH4	1	0.92366	0.91048	1	15655	0	-1.4222	0.076342	0.089518	0.820419	1295	0	-1.4222
SUSD5	2	0.80892	0.89142	1	13788	0	-3.488	0.076355	0.11479	0.820419	1296	1	-3.488
TJP2	2	0.96291	0.9663	1	16333	0	-2.4709	0.076415	0.11479	0.820419	1297	1	-2.4709
EIF2B4	2	0.39958	0.67142	1	7798	1	-4.0938	0.076474	0.11479	0.820419	1298	1	-4.0938
TEX38	3	0.47229	0.8087	1	8848	1	-6.1934	0.076497	0.10267	0.820419	1299	1	-6.1934
FGF22	1	0.92347	0.91048	1	15654	0	-1.4542	0.076527	0.089518	0.820419	1300	0	-1.4542
CLIP4	3	0.37479	0.74424	1	7429	1	-4.4925	0.076585	0.10267	0.820419	1301	1	-4.4925
GLYATL2	1	0.92341	0.91048	1	15652	0	-2.0744	0.076589	0.089518	0.820419	1302	0	-2.0744
CXorf57	2	0.76651	0.86576	1	13101	0	-3.6074	0.076593	0.11479	0.820419	1303	1	-3.6074
SLC25A45	1	0.92335	0.91048	1	15651	0	-2.5312	0.076651	0.089518	0.820419	1304	0	-2.5312
hsa-mir-323a	1	0.92329	0.91048	1	15650	0	-1.0944	0.076713	0.089518	0.820419	1305	0	-1.0944
MAP1LC3B2	2	0.59051	0.78623	1	10439	1	-3.1254	0.076771	0.11867	0.820419	1306	1	-3.1254
MS4A6A	1	0.9231	0.91048	1	15649	0	-2.0317	0.076898	0.089518	0.820419	1307	0	-2.0317
OR52K1	1	0.92307	0.91048	1	15646	0	-2.5454	0.076929	0.089518	0.820419	1308	0	-2.5454
PCDHGB6	2	0.24083	0.56384	1	5484	1	-4.5264	0.076949	0.11867	0.820419	1309	1	-4.5264
SMCO3	3	0.12753	0.48683	1	3155	2	-9.2714	0.077112	0.10267	0.820419	1310	1	-9.2714
CALHM2	1	0.92289	0.91048	1	15643	0	-1.5202	0.077114	0.089518	0.820419	1311	0	-1.5202
LRP3	2	0.21478	0.52906	1	4957	1	-4.5394	0.077127	0.11867	0.820419	1312	1	-4.5394
TBK1	1	0.92282	0.91048	1	15642	0	-1.8562	0.077176	0.089518	0.820419	1313	0	-1.8562
PATE4	2	0.80957	0.89142	1	13808	0	-1.632	0.077186	0.11867	0.820419	1314	1	-1.632
USP53	1	0.92276	0.91048	1	15641	0	-1.831	0.077238	0.089518	0.820419	1315	0	-1.831
KRTAP5-7	1	0.92273	0.91048	1	15640	0	-1.0201	0.077269	0.089518	0.820419	1316	0	-1.0201
NHP2L1	2	0.99174	0.98877	1	16839	0	-0.66	0.077305	0.11867	0.820419	1317	1	-0.66
SLC27A5	2	0.9519	0.96321	1	16160	0	-2.557	0.077483	0.11867	0.820419	1318	1	-2.557
CHKA	1	0.92248	0.90631	1	15638	0	-1.5343	0.077516	0.093688	0.820419	1319	0	-1.5343
KCNV1	4	0.98895	0.99468	1	16802	0	-5.3371	0.077518	0.11585	0.820419	1320	1	-5.3371
ZNF75D	1	0.92245	0.90631	1	15637	0	-1.7091	0.077547	0.093688	0.820419	1321	0	-1.7091
SERPINF1	2	0.98121	0.98136	1	16675	0	-1.2799	0.077602	0.11867	0.820419	1322	1	-1.2799
hsa-mir-4285	1	0.92239	0.90631	1	15636	0	-2.1341	0.077609	0.093688	0.820419	1323	0	-2.1341
SUPT4H1	3	0.88596	0.95025	1	15035	0	-6.1108	0.077639	0.10267	0.820419	1324	1	-6.1108
ACSL1	2	0.86046	0.9145	1	14616	0	-2.9456	0.07772	0.11867	0.820419	1325	1	-2.9456
HSPD1	1	0.92227	0.90631	1	15632	0	-1.5336	0.077732	0.093688	0.820419	1326	0	-1.5336
GPR119	2	0.68453	0.82454	1	11827	1	-3.744	0.077839	0.11867	0.820419	1327	1	-3.744
hsa-mir-1229	1	0.92208	0.90631	1	15628	0	-0.90048	0.077917	0.093688	0.820419	1328	0	-0.90048
ATP6V0A4	1	0.92199	0.90631	1	15627	0	-1.9519	0.07801	0.093688	0.820419	1329	0	-1.9519
DAPL1	2	0.58496	0.78623	1	10357	1	-3.9605	0.078076	0.11867	0.820419	1330	1	-3.9605
NT5C1B-RDH14	1	0.92187	0.90631	1	15626	0	-1.7291	0.078134	0.093688	0.820419	1331	0	-1.7291
OR5B17	1	0.92184	0.90631	1	15625	0	-2.6391	0.078165	0.093688	0.820419	1332	0	-2.6391
C9orf131	2	0.3366	0.62541	1	6887	1	-4.4004	0.078313	0.11867	0.820419	1333	1	-4.4004
PNISR	1	0.92168	0.90631	1	15623	0	-1.6403	0.078319	0.093688	0.820419	1334	0	-1.6403
DEPDC4	3	0.76058	0.91167	1	12992	1	-6.6834	0.078429	0.11341	0.820419	1335	1	-6.6834
SETD4	2	0.9704	0.97401	1	16481	0	-2.3049	0.078432	0.11867	0.820419	1336	1	-2.3049
LIPA	1	0.92153	0.90631	1	15617	0	-1.6212	0.078473	0.093688	0.820419	1337	0	-1.6212
FAM19A1	2	0.94055	0.9522	1	15948	0	-2.5423	0.078491	0.11867	0.820419	1338	1	-2.5423
NAP1L2	1	0.9215	0.90631	1	15616	0	-1.3459	0.078504	0.093688	0.820419	1339	0	-1.3459
hsa-mir-661	1	0.9214	0.90631	1	15613	0	-1.806	0.078597	0.093688	0.820419	1340	0	-1.806
PLEKHG3	3	0.12017	0.47689	1	2984	2	-7.6137	0.078605	0.11341	0.820419	1341	1	-7.6137
DNAH10	2	0.024101	0.11792	1	683	1	-5.1157	0.07861	0.11867	0.820419	1342	1	-5.1157
SSBP3	3	0.94472	0.97455	1	16020	0	-0.80237	0.07878	0.11341	0.820419	1343	1	-0.80237
RPS8	2	0.99633	0.99336	1	16930	0	0.183	0.078847	0.11867	0.820419	1344	1	0.183
ANKRD30B	3	0.3226	0.71156	1	6697	2	-8.5612	0.078868	0.11341	0.820419	1345	1	-8.5612
hsa-mir-196a-1	1	0.92109	0.90424	1	15608	0	-1.1634	0.078906	0.095764	0.820419	1346	0	-1.1634
PBDC1	2	0.97918	0.97902	1	16630	0	-2.0326	0.078966	0.11867	0.820419	1347	1	-2.0326
ADH6	2	0.97178	0.97469	1	16503	0	-2.2369	0.079025	0.11867	0.820419	1348	1	-2.2369
hsa-mir-3174	2	0.99321	0.99002	1	16870	0	-0.48735	0.079144	0.11867	0.820419	1349	1	-0.48735
OR5F1	2	0.91372	0.93673	1	15492	0	-3.0943	0.079203	0.11867	0.820419	1350	1	-3.0943
SYNDIG1L	1	0.92072	0.90424	1	15604	0	-1.9761	0.079277	0.095764	0.820419	1351	0	-1.9761
GAK	2	0.99471	0.99268	1	16901	0	-0.2604	0.079321	0.11867	0.820419	1352	1	-0.2604
LRRC10	1	0.92066	0.90424	1	15602	0	-1.4349	0.079338	0.095764	0.820419	1353	0	-1.4349
FLT3LG	2	0.99337	0.99043	1	16875	0	-0.62053	0.079381	0.11867	0.820419	1354	1	-0.62053
EXT2	2	0.78782	0.87896	1	13449	0	-3.6575	0.07944	0.11867	0.820419	1355	1	-3.6575
MICB	3	0.095783	0.40819	1	2435	1	-7.1919	0.079482	0.11341	0.820419	1356	1	-7.1919
TAF10	2	0.54841	0.76501	1	9869	1	-4.1223	0.079499	0.11867	0.820419	1357	1	-4.1223
TMEM159	3	0.089992	0.39145	1	2322	2	-9.4448	0.07957	0.11341	0.820419	1358	1	-9.4448
SPCS1	2	0.93691	0.95043	1	15884	0	-2.8592	0.079618	0.11867	0.820419	1359	1	-2.8592
FAM219B	1	0.92023	0.90424	1	15596	0	-1.1119	0.079771	0.095764	0.820419	1360	0	-1.1119
ARL8B	3	0.26105	0.66015	1	5838	1	-6.7663	0.079833	0.11341	0.820419	1361	1	-6.7663
KEAP1	2	0.72928	0.84447	1	12500	1	-3.6914	0.079855	0.12251	0.820419	1362	1	-3.6914
THBS2	1	0.92011	0.90424	1	15595	0	-1.7532	0.079894	0.095764	0.820419	1363	0	-1.7532
P2RX1	1	0.91998	0.90424	1	15594	0	-1.5682	0.080018	0.095765	0.820419	1364	0	-1.5682
DMGDH	3	0.66517	0.88768	1	11543	1	-5.2659	0.080183	0.11341	0.820419	1365	1	-5.2659
SEC63	1	0.9198	0.90424	1	15590	0	-1.2303	0.080203	0.095765	0.820419	1366	0	-1.2303
hsa-mir-4767	1	0.91973	0.90424	1	15589	0	-2.2812	0.080265	0.095765	0.820419	1367	0	-2.2812
VWA1	2	0.62183	0.79698	1	10901	1	-3.9372	0.080388	0.12251	0.820419	1368	1	-3.9372
OR52I1	1	0.91961	0.90424	1	15588	0	-1.2779	0.080389	0.095765	0.820419	1369	0	-1.2779
MYOM2	2	0.77535	0.8673	1	13237	0	-3.5977	0.080447	0.12251	0.820419	1370	1	-3.5977
LCE3C	1	0.91952	0.90424	1	15587	0	-2.317	0.080481	0.095765	0.820419	1371	0	-2.317
THNSL2	2	0.57881	0.78316	1	10281	1	-4.047	0.080507	0.12251	0.820419	1372	1	-4.047
PCDHGA6	1	0.91949	0.90424	1	15586	0	-1.3139	0.080512	0.095765	0.820419	1373	0	-1.3139
FMO4	1	0.91946	0.90424	1	15585	0	-1.4095	0.080543	0.095765	0.820419	1374	0	-1.4095
TSPYL1	2	0.92059	0.93877	1	15601	0	-3.0199	0.080684	0.12251	0.820419	1375	1	-3.0199
ZCCHC4	2	0.051311	0.20647	1	1405	1	-5.0352	0.080803	0.12251	0.820419	1376	1	-5.0352
XPNPEP2	2	0.79738	0.88322	1	13610	0	-3.6192	0.080862	0.12251	0.820419	1377	1	-3.6192
PIK3C2G	1	0.91909	0.90424	1	15581	0	-1.8294	0.080914	0.095765	0.820419	1378	0	-1.8294
CHRM3	2	0.29194	0.5916	1	6275	1	-4.5459	0.080921	0.12251	0.820419	1379	1	-4.5459
AIRE	1	0.91906	0.90424	1	15579	0	-2.3893	0.080945	0.095765	0.820419	1380	0	-2.3893
PSME2	2	0.99245	0.98877	1	16856	0	-0.66691	0.08104	0.12251	0.820419	1381	1	-0.66691
DLX1	1	0.91893	0.90424	1	15577	0	-2.7659	0.081068	0.095765	0.820419	1382	0	-2.7659
NMBR	2	0.9369	0.95043	1	15882	0	-2.3922	0.081099	0.12251	0.820419	1383	1	-2.3922
hsa-mir-1236	1	0.91862	0.90218	1	15574	0	-1.2333	0.081377	0.097818	0.820419	1384	0	-1.2333
NCL	2	0.94818	0.96073	1	16080	0	-2.658	0.081395	0.12251	0.820419	1385	1	-2.658
hsa-mir-4688	1	0.91859	0.90218	1	15573	0	-1.9595	0.081408	0.097818	0.820419	1386	0	-1.9595
hsa-mir-4999	2	0.16027	0.45793	1	3864	1	-4.7942	0.081454	0.12251	0.820419	1387	1	-4.7942
MYO5B	3	0.29909	0.69527	1	6379	1	-4.5673	0.081585	0.11341	0.820419	1388	1	-4.5673
C9orf47	2	0.82846	0.89938	1	14113	0	-3.4399	0.081632	0.12251	0.820419	1389	1	-3.4399
TMEM101	1	0.91822	0.90218	1	15568	0	-1.5244	0.081779	0.097818	0.820419	1390	0	-1.5244
PGBD2	2	0.81962	0.89676	1	13966	0	-3.555	0.081809	0.12251	0.820419	1391	1	-3.555
ZNF804B	1	0.91813	0.90218	1	15566	0	-2.5403	0.081871	0.097818	0.820419	1392	0	-2.5403
MAL2	2	0.13575	0.42432	1	3333	1	-4.8355	0.081987	0.12251	0.820419	1393	1	-4.8355
UBE2D1	1	0.91797	0.90218	1	15564	0	-2.293	0.082026	0.097818	0.820419	1394	0	-2.293
RAB43	2	0.35895	0.63921	1	7206	1	-4.388	0.082046	0.12251	0.820419	1395	1	-4.388
hsa-mir-548x-2	1	0.91791	0.90218	1	15563	0	-1.5893	0.082087	0.097818	0.820419	1396	0	-1.5893
TRIM16L	1	0.91785	0.90218	1	15560	0	-1.0294	0.082149	0.097818	0.820419	1397	0	-1.0294
RPE	3	0.16361	0.54772	1	3935	2	-9.1129	0.082198	0.11341	0.820419	1398	1	-9.1129
CAMLG	2	0.10837	0.36124	1	2715	1	-4.802	0.082224	0.12251	0.820419	1399	1	-4.802
OR1E2	3	0.49122	0.82246	1	9120	2	-7.3238	0.082285	0.11341	0.820419	1400	1	-7.3238
hsa-mir-3185	1	0.91767	0.90018	1	15557	0	-2.3411	0.082335	0.099818	0.820419	1401	0	-2.3411
TPH2	2	0.95461	0.96479	1	16214	0	-2.7921	0.082342	0.12251	0.820419	1402	1	-2.7921
KLK9	4	0.43683	0.84069	1	8328	2	-7.7434	0.082393	0.1226	0.820419	1403	1	-7.7434
ATP1B2	3	0.23252	0.63828	1	5322	1	-6.4223	0.08246	0.11341	0.820419	1404	1	-6.4223
hsa-mir-4671	1	0.91751	0.90018	1	15553	0	-1.6697	0.082489	0.099818	0.820419	1405	0	-1.6697
KLHL1	2	0.74689	0.85824	1	12775	1	-3.7459	0.082579	0.12251	0.820419	1406	1	-3.7459
TMEM38A	1	0.91729	0.90018	1	15549	0	-1.4782	0.082705	0.099818	0.820419	1407	0	-1.4782
UBB	2	0.12052	0.39364	1	2993	1	-4.856	0.082756	0.12251	0.820419	1408	1	-4.856
HIST1H4D	2	0.83392	0.90583	1	14208	0	-3.0288	0.082934	0.12251	0.820419	1409	1	-3.0288
ANK1	1	0.91705	0.90018	1	15545	0	-2.2499	0.082952	0.099818	0.820419	1410	0	-2.2499
hsa-mir-551b	3	0.043419	0.27303	1	1184	2	-6.8886	0.082985	0.11341	0.820419	1411	1	-6.8886
RABL3	1	0.91695	0.90018	1	15544	0	-2.8947	0.083045	0.099818	0.820419	1412	0	-2.8947
PHKG2	2	0.83677	0.90709	1	14243	0	-2.6878	0.083052	0.12251	0.820419	1413	1	-2.6878
FABP6	3	0.2123	0.61753	1	4909	1	-7.4777	0.083072	0.11341	0.820419	1414	1	-7.4777
C9orf139	1	0.91683	0.90018	1	15541	0	-2.8978	0.083169	0.099818	0.820419	1415	0	-2.8978
BRDT	2	0.14005	0.4313	1	3433	1	-4.0627	0.08323	0.12251	0.820419	1416	1	-4.0627
AKR1A1	2	0.11971	0.39364	1	2973	1	-4.9413	0.083289	0.12251	0.820419	1417	1	-4.9413
ZBTB38	2	0.27247	0.58548	1	6001	1	-4.6091	0.083407	0.12251	0.820419	1418	1	-4.6091
COL12A1	1	0.91655	0.90018	1	15537	0	-2.8924	0.083447	0.099818	0.820419	1419	0	-2.8924
PBLD	2	0.12804	0.40933	1	3166	1	-4.9207	0.083466	0.12251	0.820419	1420	1	-4.9207
KIF23	2	0.9746	0.97532	1	16558	0	-1.713	0.083584	0.12251	0.820419	1421	1	-1.713
DDX49	2	0.59197	0.78623	1	10466	1	-4.1146	0.083644	0.12251	0.820419	1422	1	-4.1146
NCOR1	3	0.9922	0.99373	1	16849	0	-5.1878	0.083685	0.11341	0.820419	1423	1	-5.1878
CAMK2N1	2	0.97776	0.97843	1	16609	0	-2.1127	0.083703	0.12251	0.820419	1424	1	-2.1127
LRRC72	2	0.095433	0.32921	1	2427	1	-4.975	0.083762	0.12251	0.820419	1425	1	-4.975
TRPV3	1	0.91615	0.90018	1	15532	0	-1.3558	0.083848	0.099818	0.820419	1426	0	-1.3558
IL17C	3	0.96446	0.98034	1	16371	0	-6.9141	0.083859	0.11341	0.820419	1427	1	-6.9141
ADK	2	0.99661	0.99427	1	16937	0	0.016063	0.083998	0.12251	0.820419	1428	1	0.016063
PODXL	1	0.916	0.90018	1	15530	0	-1.9913	0.084003	0.099818	0.820419	1429	0	-1.9913
CTSC	2	0.95684	0.96479	1	16244	0	-2.8972	0.084057	0.12251	0.820419	1430	1	-2.8972
DST	2	0.67276	0.81683	1	11654	1	-2.7845	0.084117	0.12251	0.820419	1431	1	-2.7845
NBAS	3	0.96437	0.98034	1	16370	0	-3.129	0.084122	0.11341	0.820419	1432	1	-3.129
PET100	2	0.54195	0.76351	1	9776	1	-4.0782	0.084176	0.12251	0.820419	1433	1	-4.0782
hsa-mir-4309	1	0.91563	0.90018	1	15524	0	-2.9612	0.084373	0.099818	0.820419	1434	0	-2.9612
WISP2	1	0.9155	0.89816	1	15521	0	-1.8223	0.084497	0.10184	0.820419	1435	0	-1.8223
PPP6C	1	0.91547	0.89816	1	15520	0	-1.6687	0.084528	0.10184	0.820419	1436	0	-1.6687
RINL	2	0.87638	0.92279	1	14867	0	-2.9872	0.08453	0.12251	0.820419	1437	1	-2.9872
UGT2B28	1	0.91544	0.89816	1	15519	0	-1.3767	0.084559	0.10184	0.820419	1438	0	-1.3767
PPP1R15B	1	0.91535	0.89816	1	15517	0	-2.2281	0.084651	0.10184	0.820419	1439	0	-2.2281
ELL	2	0.69577	0.82912	1	11991	1	-3.886	0.084708	0.12251	0.820419	1440	1	-3.886
KIAA1984	2	0.73782	0.85211	1	12624	1	-3.8783	0.084767	0.12251	0.820419	1441	1	-3.8783
ZNF618	1	0.91519	0.89816	1	15516	0	-1.3428	0.084806	0.10184	0.820419	1442	0	-1.3428
EIF3CL	1	0.91498	0.89816	1	15514	0	-2.3231	0.085022	0.10184	0.820419	1443	0	-2.3231
NR2F6	1	0.91495	0.89816	1	15513	0	-2.1755	0.085053	0.10184	0.820419	1444	0	-2.1755
CUBN	3	0.45138	0.79396	1	8543	1	-5.7587	0.085257	0.11341	0.820419	1445	1	-5.7587
SMIM10	1	0.91473	0.89816	1	15509	0	-1.8851	0.085269	0.10184	0.820419	1446	0	-1.8851
hsa-mir-138-1	2	0.41234	0.6852	1	7984	1	-4.4386	0.085299	0.12251	0.820419	1447	1	-4.4386
ZNF467	1	0.91464	0.89816	1	15506	0	-3.1021	0.085362	0.10184	0.820419	1448	0	-3.1021
ZNF846	4	0.037027	0.31313	1	1034	3	-7.9867	0.085516	0.1226	0.820419	1449	1	-7.9867
OR13C5	3	0.86081	0.93999	1	14624	1	-1.8132	0.085519	0.11341	0.820419	1450	1	-1.8132
HOXD4	2	0.8956	0.92828	1	15203	0	-2.8273	0.085535	0.12251	0.820419	1451	1	-2.8273
TATDN2	2	0.99264	0.9896	1	16863	0	-0.83108	0.085594	0.12251	0.820419	1452	1	-0.83108
hsa-mir-7156	1	0.91436	0.89816	1	15503	0	-1.6388	0.08564	0.10184	0.820419	1453	0	-1.6388
RASIP1	2	0.54936	0.76501	1	9881	1	-4.2463	0.085653	0.12251	0.820419	1454	1	-4.2463
UBQLN3	1	0.9143	0.89816	1	15501	0	-1.4467	0.085701	0.10184	0.820419	1455	0	-1.4467
FAM187B	2	0.99744	0.99491	1	16951	0	0.14331	0.085771	0.12251	0.820419	1456	1	0.14331
IGDCC3	3	0.25503	0.65876	1	5749	2	-8.7837	0.085781	0.11341	0.820419	1457	1	-8.7837
CEBPA	1	0.91419	0.89816	1	15498	0	-2.2191	0.08581	0.10184	0.820419	1458	0	-2.2191
UBOX5	2	0.59261	0.78781	1	10474	1	-4.1124	0.085948	0.12251	0.820419	1459	1	-4.1124
RASSF9	3	0.72856	0.90566	1	12491	1	-7.2693	0.085956	0.11341	0.820419	1460	1	-7.2693
ELOVL2	2	0.47364	0.72497	1	8865	1	-4.3069	0.086008	0.12251	0.820419	1461	1	-4.3069
CACNA1H	2	0.99455	0.99268	1	16896	0	-0.63956	0.086067	0.12251	0.820419	1462	1	-0.63956
PLEKHB1	2	0.76041	0.86276	1	12991	0	-3.9165	0.086126	0.12251	0.820419	1463	1	-3.9165
NEUROG1	1	0.91371	0.89816	1	15491	0	-2.7698	0.086288	0.10184	0.820419	1464	0	-2.7698
MAST2	2	0.90938	0.93468	1	15412	0	-3.1229	0.086303	0.12251	0.820419	1465	1	-3.1229
KISS1	3	0.93902	0.97288	1	15923	0	-4.7381	0.086305	0.11341	0.820419	1466	1	-4.7381
hsa-mir-6080	1	0.91368	0.89816	1	15490	0	-3.2649	0.086319	0.10184	0.820419	1467	0	-3.2649
IFT140	3	0.49888	0.82943	1	9213	1	-1.566	0.086392	0.11341	0.820419	1468	1	-1.566
LRRN1	2	0.95872	0.96557	1	16278	0	-2.4763	0.086421	0.12251	0.820419	1469	1	-2.4763
UBE2R2	2	0.77388	0.8673	1	13213	0	-3.7677	0.08648	0.12251	0.820419	1470	1	-3.7677
C8orf34	1	0.91325	0.89407	1	15482	0	-1.7842	0.086752	0.10593	0.820419	1471	0	-1.7842
C20orf202	3	0.87757	0.94769	1	14894	0	-6.0044	0.086828	0.11341	0.820419	1472	1	-6.0044
PRRT4	3	0.92952	0.96817	1	15752	0	-6.406	0.086915	0.11341	0.820419	1473	1	-6.406
IPO4	2	0.45205	0.70664	1	8553	1	-4.3706	0.086952	0.12251	0.820419	1474	1	-4.3706
KDM5B	1	0.91303	0.89407	1	15480	0	-2.4727	0.086968	0.10593	0.820419	1475	0	-2.4727
COQ9	1	0.913	0.89407	1	15479	0	-2.0968	0.086999	0.10593	0.820419	1476	0	-2.0968
ZNF547	3	0.1148	0.45405	1	2857	1	-0.36056	0.087003	0.11341	0.820419	1477	1	-0.36056
SLC25A17	2	0.01376	0.083958	1	387	1	-5.4133	0.08707	0.12251	0.820419	1478	1	-5.4133
GRXCR2	3	0.27179	0.67015	1	5994	2	-8.7234	0.08709	0.11341	0.820419	1479	1	-8.7234
FCF1	3	0.93939	0.97288	1	15932	0	-6.0248	0.087177	0.11341	0.820419	1480	1	-6.0248
TMEM114	1	0.91278	0.89407	1	15476	0	-3.2913	0.087215	0.10593	0.820419	1481	0	-3.2913
GALM	2	0.23943	0.5623	1	5461	1	-4.6241	0.087306	0.12251	0.820419	1482	1	-4.6241
RALY	2	0.98211	0.98248	1	16692	0	-1.5257	0.087365	0.12251	0.820419	1483	1	-1.5257
SOD2	1	0.91258	0.89407	1	15473	0	-2.2999	0.087416	0.10593	0.820419	1484	0	-2.2999
PSMB5	2	0.85554	0.91333	1	14547	0	-3.5	0.087483	0.12251	0.820419	1485	0	-3.5
PUM2	1	0.91238	0.89407	1	15469	0	-1.7586	0.087617	0.10593	0.820419	1486	0	-1.7586
PIBF1	3	0.9539	0.97716	1	16200	0	-6.9178	0.0877	0.11341	0.820419	1487	1	-6.9178
PPP1R15A	1	0.91226	0.89407	1	15465	0	-3.2848	0.08774	0.10593	0.820419	1488	0	-3.2848
hsa-mir-1269a	2	0.20434	0.51271	1	4745	1	-4.8146	0.087779	0.12251	0.820419	1489	0	-4.8146
CTSD	3	0.70964	0.89705	1	12192	1	-6.9448	0.087874	0.11341	0.820419	1490	1	-6.9448
OR5B21	2	0.28929	0.5916	1	6237	1	-4.6544	0.087897	0.12251	0.820419	1491	0	-4.6544
SLC17A2	2	0.65804	0.81224	1	11439	1	-4.0627	0.087956	0.12251	0.820419	1492	0	-4.0627
OPLAH	1	0.91204	0.89407	1	15463	0	-2.2598	0.087956	0.10593	0.820419	1493	0	-2.2598
NXPH3	1	0.91198	0.89407	1	15462	0	-1.0924	0.088018	0.10593	0.820419	1494	0	-1.0924
CLIP2	3	0.74689	0.90735	1	12776	1	-5.7109	0.088049	0.11873	0.820419	1495	1	-5.7109
JAG1	2	0.73956	0.85211	1	12656	1	-3.888	0.088133	0.12251	0.820419	1496	0	-3.888
CCDC175	3	0.8623	0.93999	1	14649	1	-7.433	0.088136	0.11873	0.820419	1497	1	-7.433
KRTAP9-6	2	0.13879	0.4313	1	3411	1	-4.854	0.088192	0.12251	0.820419	1498	0	-4.854
NR1D2	3	0.50429	0.83112	1	9289	1	-7.3722	0.088223	0.11873	0.820419	1499	1	-7.3722
ORMDL3	1	0.91173	0.89407	1	15459	0	-1.9346	0.088265	0.10593	0.820419	1500	0	-1.9346
SV2B	1	0.9117	0.89407	1	15458	0	-2.0212	0.088296	0.10593	0.820419	1501	0	-2.0212
hsa-mir-6840	2	0.9784	0.97843	1	16620	0	-2.4078	0.088368	0.12251	0.820419	1502	0	-2.4078
DLGAP5	3	0.14035	0.50485	1	3439	1	-4.6231	0.088397	0.11873	0.820419	1503	1	-4.6231
SUPT20HL2	2	0.98884	0.98697	1	16800	0	-1.2116	0.088427	0.12251	0.820419	1504	0	-1.2116
TXN2	2	0.047998	0.20254	1	1322	1	-5.2184	0.088486	0.12251	0.820419	1505	0	-5.2184
HSD17B11	2	0.96408	0.96776	1	16362	0	-1.787	0.088604	0.12251	0.820419	1506	0	-1.787
KPNB1	1	0.91136	0.89407	1	15455	0	-2.2969	0.088636	0.10593	0.820419	1507	0	-2.2969
CEACAM1	2	0.906	0.93257	1	15361	0	-2.9193	0.088722	0.12251	0.820419	1508	0	-2.9193
LGALS16	1	0.91127	0.89407	1	15449	0	-1.5014	0.088729	0.10593	0.820419	1509	0	-1.5014
MRPS18C	1	0.91118	0.89407	1	15447	0	-2.0815	0.088821	0.10593	0.820419	1510	0	-2.0815
ADAM2	2	0.75263	0.85977	1	12866	0	-3.8836	0.08884	0.12251	0.820419	1511	0	-3.8836
SOAT2	1	0.91112	0.89407	1	15446	0	-1.8625	0.088883	0.10593	0.820419	1512	0	-1.8625
hsa-mir-1204	2	0.77167	0.8673	1	13177	0	-3.1957	0.088899	0.12251	0.820419	1513	0	-3.1957
EIF2S3	1	0.91093	0.89407	1	15445	0	-3.1381	0.089068	0.10593	0.820419	1514	0	-3.1381
LAMB4	2	0.98451	0.98457	1	16734	0	-1.5016	0.089076	0.12251	0.820419	1515	0	-1.5016
NDUFA10	2	0.92883	0.9457	1	15740	0	-3.1168	0.089194	0.12251	0.820419	1516	0	-3.1168
GLDN	2	0.83316	0.9046	1	14193	0	-3.6488	0.089312	0.12251	0.820419	1517	0	-3.6488
BARHL2	1	0.91068	0.89407	1	15443	0	-3.3099	0.089316	0.10593	0.820419	1518	0	-3.3099
ATF7IP	2	0.55947	0.768	1	10040	1	-4.2667	0.089371	0.12251	0.820419	1519	0	-4.2667
NYNRIN	1	0.91056	0.89407	1	15440	0	-1.6737	0.089439	0.10593	0.820419	1520	0	-1.6737
CATSPER3	4	0.56675	0.89018	1	10143	2	-6.6259	0.089554	0.13595	0.820419	1521	1	-6.6259
CLCF1	1	0.91034	0.89407	1	15436	0	-3.4046	0.089655	0.10593	0.820419	1522	0	-3.4046
SLC19A1	1	0.91028	0.89407	1	15435	0	-2.4636	0.089717	0.10593	0.820419	1523	0	-2.4636
C4orf32	1	0.91019	0.89407	1	15433	0	-3.1679	0.08981	0.10593	0.820419	1524	0	-3.1679
TRNT1	1	0.91016	0.89407	1	15431	0	-2.8944	0.089841	0.10593	0.820419	1525	0	-2.8944
CCDC174	2	0.49357	0.74032	1	9150	1	-4.3581	0.089843	0.1263	0.820419	1526	0	-4.3581
ATG16L2	2	0.96529	0.96776	1	16387	0	-2.1243	0.089901	0.1263	0.820419	1527	0	-2.1243
MINPP1	1	0.91007	0.89407	1	15430	0	-1.4247	0.089933	0.10593	0.820419	1528	0	-1.4247
KIAA0391	1	0.91004	0.89407	1	15428	0	-1.1844	0.089964	0.10593	0.820419	1529	0	-1.1844
DNER	3	0.81848	0.92627	1	13949	1	-7.8555	0.089965	0.11873	0.820419	1530	1	-7.8555
OR2AG2	1	0.90997	0.89407	1	15426	0	-2.6011	0.090026	0.10593	0.820419	1531	0	-2.6011
GNG3	1	0.90994	0.89407	1	15423	0	-1.5389	0.090057	0.10593	0.820419	1532	0	-1.5389
CYR61	2	0.39743	0.67142	1	7769	1	-4.5029	0.090137	0.1263	0.820419	1533	0	-4.5029
HLF	1	0.90982	0.89407	1	15421	0	-2.5118	0.09018	0.10593	0.820419	1534	0	-2.5118
TRIM65	1	0.90979	0.89407	1	15420	0	-2.7097	0.090211	0.10593	0.820419	1535	0	-2.7097
GPKOW	1	0.90976	0.89407	1	15418	0	-2.4539	0.090242	0.10593	0.820419	1536	0	-2.4539
R3HCC1L	1	0.9097	0.89407	1	15417	0	-1.3362	0.090304	0.10593	0.820419	1537	0	-1.3362
EME2	2	0.60656	0.79085	1	10672	1	-4.2175	0.090373	0.13014	0.820419	1538	0	-4.2175
GIMAP6	3	0.44796	0.79297	1	8490	2	-8.1762	0.0904	0.11873	0.820419	1539	1	-8.1762
OXSR1	2	0.24282	0.56699	1	5525	1	-4.6478	0.090432	0.13014	0.820419	1540	0	-4.6478
RBM34	1	0.90948	0.89407	1	15415	0	-2.5955	0.09052	0.10593	0.820419	1541	0	-2.5955
TMEM151B	2	0.17694	0.48165	1	4200	1	-4.9282	0.09055	0.13014	0.820419	1542	0	-4.9282
GOLGA6L10	1	0.90942	0.89407	1	15414	0	-1.5584	0.090582	0.10593	0.820419	1543	0	-1.5584
hsa-mir-6745	1	0.90939	0.89407	1	15413	0	-3.1269	0.090613	0.10593	0.820419	1544	0	-3.1269
C2orf27A	3	0.99554	0.99597	1	16918	0	-2.7432	0.090661	0.11873	0.820419	1545	1	-2.7432
ZCCHC2	2	0.97381	0.97469	1	16543	0	-2.2083	0.090726	0.13014	0.820419	1546	0	-2.2083
PAGE2	2	0.65862	0.81224	1	11447	1	-4.0787	0.090785	0.13014	0.820419	1547	0	-4.0787
hsa-mir-4670	1	0.9092	0.89407	1	15409	0	-1.5389	0.090798	0.10593	0.820419	1548	0	-1.5389
LRFN4	1	0.90917	0.89407	1	15406	0	-2.49	0.090829	0.10593	0.820419	1549	0	-2.49
POSTN	3	0.57703	0.85836	1	10258	1	-0.17801	0.090835	0.11873	0.820419	1550	1	-0.17801
C11orf93	2	0.96392	0.96776	1	16359	0	-2.6444	0.090903	0.13014	0.820419	1551	0	-2.6444
EMC2	2	0.80291	0.88602	1	13687	0	-3.7357	0.090962	0.13014	0.820419	1552	0	-3.7357
SRGAP2	1	0.90883	0.89407	1	15405	0	-3.2258	0.091169	0.10593	0.820419	1553	0	-3.2258
CRABP1	2	0.40579	0.6791	1	7880	1	-4.5314	0.091198	0.13014	0.820419	1554	0	-4.5314
CALCR	1	0.90877	0.89407	1	15403	0	-3.2262	0.091231	0.10593	0.820419	1555	0	-3.2262
MEIS1	2	0.34367	0.63152	1	6989	1	-4.6181	0.091256	0.13014	0.820419	1556	0	-4.6181
CLCN1	4	0.36612	0.80968	1	7315	2	-7.3329	0.09128	0.13595	0.820419	1557	1	-7.3329
RFT1	2	0.99723	0.99491	1	16946	0	-0.03571	0.091315	0.13014	0.820419	1558	0	-0.03571
LGMN	2	0.74038	0.85211	1	12670	1	-4.0211	0.091374	0.13014	0.820419	1559	0	-4.0211
FAM185A	3	0.074034	0.35435	1	1946	2	-9.2159	0.091443	0.11873	0.820419	1560	1	-9.2159
YEATS2	1	0.90852	0.89407	1	15398	0	-2.6728	0.091478	0.10593	0.820419	1561	0	-2.6728
hsa-mir-9-1	2	0.73884	0.85211	1	12644	1	-3.9448	0.091492	0.13014	0.820419	1562	0	-3.9448
hsa-mir-4744	2	0.030012	0.13302	1	851	1	-5.3245	0.091669	0.13014	0.820419	1563	0	-5.3245
hsa-mir-4786	2	0.27331	0.58548	1	6014	1	-4.7497	0.091728	0.13014	0.820419	1564	0	-4.7497
TTC13	1	0.90824	0.89407	1	15396	0	-2.7805	0.091756	0.10593	0.820419	1565	0	-2.7805
AGPAT5	3	0.30949	0.70194	1	6531	2	-8.5991	0.091878	0.11873	0.820419	1566	1	-8.5991
QRFP	1	0.90806	0.89407	1	15392	0	-3.5427	0.091941	0.10593	0.820419	1567	0	-3.5427
hsa-mir-4473	1	0.908	0.89407	1	15391	0	-2.0869	0.092003	0.10593	0.820419	1568	0	-2.0869
LRRC8C	2	0.67074	0.81683	1	11626	1	-4.0845	0.092081	0.13393	0.820419	1569	0	-4.0845
LEPREL2	1	0.9079	0.89407	1	15389	0	-2.2999	0.092096	0.10593	0.820419	1570	0	-2.2999
ALOX5	3	0.49029	0.82246	1	9109	1	-7.6835	0.092225	0.11873	0.820419	1571	1	-7.6835
AKAP1	2	0.38625	0.66531	1	7600	1	-4.5889	0.092257	0.13393	0.820419	1572	0	-4.5889
F8	1	0.90769	0.89407	1	15387	0	-1.2296	0.092312	0.10593	0.820419	1573	0	-1.2296
QRSL1	2	0.56405	0.77104	1	10104	1	-4.3092	0.092316	0.13393	0.820419	1574	0	-4.3092
FCHO1	1	0.90766	0.89407	1	15386	0	-2.2323	0.092343	0.10593	0.820419	1575	0	-2.2323
EIF3F	1	0.90763	0.89407	1	15385	0	-2.5624	0.092374	0.10593	0.820419	1576	0	-2.5624
KRTAP19-5	2	0.33665	0.62541	1	6889	1	-4.6499	0.092493	0.13393	0.820419	1577	0	-4.6499
RBM38	2	0.95153	0.96321	1	16151	0	-2.4489	0.092552	0.13393	0.820419	1578	0	-2.4489
DAG1	4	0.65237	0.92133	1	11355	1	-5.9123	0.092659	0.13595	0.820419	1579	1	-5.9123
GPR156	2	0.98262	0.9835	1	16700	0	-2.1496	0.092728	0.13393	0.820419	1580	0	-2.1496
BGLAP	1	0.90719	0.89407	1	15380	0	-2.7881	0.092806	0.10593	0.820419	1581	0	-2.7881
KCNA2	2	0.49524	0.74033	1	9166	1	-4.4206	0.092846	0.13393	0.820419	1582	0	-4.4206
CYP11B2	1	0.90713	0.89407	1	15379	0	-2.6085	0.092868	0.10593	0.820419	1583	0	-2.6085
MICU2	1	0.9071	0.89407	1	15378	0	-3.2986	0.092899	0.10593	0.820419	1584	0	-3.2986
DOCK2	2	0.36457	0.64535	1	7291	1	-4.6243	0.092905	0.13393	0.820419	1585	0	-4.6243
hsa-mir-1294	1	0.90701	0.89407	1	15376	0	-2.0488	0.092991	0.10593	0.820419	1586	0	-2.0488
IMPAD1	2	0.49265	0.73876	1	9137	1	-4.4293	0.093022	0.13393	0.820419	1587	0	-4.4293
EGR1	2	0.96042	0.9663	1	16295	0	-2.4945	0.093081	0.13393	0.820419	1588	0	-2.4945
SCN3B	2	0.79398	0.88181	1	13559	0	-3.8156	0.09314	0.13393	0.820419	1589	0	-3.8156
TDRKH	1	0.90682	0.89407	1	15375	0	-2.2818	0.093177	0.10593	0.820419	1590	0	-2.2818
DRAXIN	3	0.74507	0.90735	1	12747	1	-7.0536	0.093181	0.11873	0.820419	1591	1	-7.0536
SASS6	1	0.90679	0.89407	1	15374	0	-2.0374	0.093208	0.10593	0.820419	1592	0	-2.0374
FBLN1	1	0.90676	0.89407	1	15373	0	-2.7723	0.093238	0.10593	0.820419	1593	0	-2.7723
DAPP1	2	0.85683	0.9145	1	14568	0	-3.1872	0.093258	0.13393	0.820419	1594	0	-3.1872
TPTE2	2	0.98483	0.98457	1	16737	0	-1.9431	0.093317	0.13393	0.820419	1595	0	-1.9431
ZNF624	2	0.17851	0.48521	1	4231	1	-4.9268	0.093375	0.13393	0.820419	1596	0	-4.9268
hsa-mir-4492	1	0.90661	0.89407	1	15370	0	-2.599	0.093393	0.10593	0.820419	1597	0	-2.599
hsa-mir-101-1	1	0.90658	0.89407	1	15369	0	-2.9159	0.093424	0.10593	0.820419	1598	0	-2.9159
TPD52L3	1	0.90651	0.89407	1	15368	0	-2.0611	0.093486	0.10593	0.820419	1599	0	-2.0611
CSF2RA_X	2	0.6229	0.79698	1	10917	1	-4.2175	0.093611	0.13393	0.820419	1600	0	-4.2175
EMB	3	0.34785	0.72746	1	7053	1	-4.2757	0.093615	0.11873	0.820419	1601	1	-4.2757
MYO3A	3	0.62347	0.87464	1	10926	1	-6.6885	0.093701	0.11873	0.820419	1602	1	-6.6885
FBXO24	2	0.1304	0.41504	1	3222	1	-5.0274	0.093787	0.13393	0.820419	1603	0	-5.0274
ADAMTS15	3	0.9886	0.99235	1	16794	0	-3.2699	0.093788	0.11873	0.820419	1604	1	-3.2699
TRIM45	3	0.7515	0.90819	1	12847	1	-4.4449	0.093875	0.11873	0.820419	1605	1	-4.4449
ITM2B	5	0.99228	0.99786	1	16852	0	-5.3103	0.093943	0.14528	0.820419	1606	1	-5.3103
POLR2E	1	0.90602	0.89407	1	15362	0	-2.1684	0.09398	0.10593	0.820419	1607	0	-2.1684
hsa-mir-652	1	0.90599	0.89407	1	15360	0	-3.1637	0.094011	0.10593	0.820419	1608	0	-3.1637
RPL8	1	0.90596	0.89407	1	15359	0	-3.3462	0.094042	0.10593	0.820419	1609	0	-3.3462
DARS2	1	0.90587	0.89407	1	15357	0	-2.137	0.094134	0.10593	0.820419	1610	0	-2.137
ACOT12	2	0.7924	0.88181	1	13527	0	-3.4022	0.094257	0.13393	0.820419	1611	0	-3.4022
KCTD10	1	0.90568	0.89407	1	15355	0	-2.8742	0.09432	0.10593	0.820419	1612	0	-2.8742
LONRF3	2	0.48974	0.73721	1	9101	1	-4.4243	0.094434	0.13393	0.820419	1613	0	-4.4243
TRIM55	2	0.96899	0.97202	1	16451	0	-2.6165	0.094493	0.13393	0.820419	1614	0	-2.6165
NEFM	2	0.77093	0.86729	1	13166	0	-3.8975	0.094551	0.13393	0.820419	1615	0	-3.8975
PTGFR	2	0.9836	0.98404	1	16717	0	-2.048	0.09461	0.13393	0.820419	1616	0	-2.048
GPR157	1	0.90528	0.89407	1	15352	0	-1.5197	0.094721	0.10593	0.820419	1617	0	-1.5197
ASCL3	2	0.95528	0.96479	1	16219	0	-2.0683	0.094728	0.13393	0.820419	1618	0	-2.0683
CCDC171	2	0.63269	0.80315	1	11068	1	-4.218	0.094787	0.13393	0.820419	1619	0	-4.218
NRG1	3	0.9905	0.99329	1	16824	0	-4.6883	0.094829	0.11873	0.820419	1620	1	-4.6883
KRTAP20-2	1	0.90516	0.89407	1	15350	0	-1.5278	0.094845	0.10593	0.820419	1621	0	-1.5278
HES5	2	0.98672	0.98601	1	16765	0	-0.77678	0.094904	0.13393	0.820419	1622	0	-0.77678
GUCY2C	3	0.94362	0.97455	1	16000	0	-5.071	0.094916	0.11873	0.820419	1623	1	-5.071
CD101	1	0.90506	0.89407	1	15347	0	-1.3708	0.094937	0.10593	0.820419	1624	0	-1.3708
MSTO1	1	0.90503	0.89407	1	15346	0	-1.814	0.094968	0.10593	0.820419	1625	0	-1.814
TMEM120A	2	0.89446	0.92723	1	15180	0	-3.4393	0.095022	0.13393	0.820419	1626	0	-3.4393
MCM4	1	0.90497	0.89407	1	15344	0	-2.1699	0.09503	0.10593	0.820419	1627	0	-2.1699
VANGL2	2	0.73162	0.84598	1	12535	1	-4.0028	0.09508	0.13393	0.820419	1628	0	-4.0028
ANXA8L2	1	0.90475	0.89407	1	15341	0	-2.6356	0.095246	0.10593	0.820419	1629	0	-2.6356
DEFB110	2	0.57913	0.78316	1	10287	1	-4.2954	0.095257	0.13393	0.820419	1630	0	-4.2954
ALDH1L1	1	0.90463	0.89407	1	15340	0	-2.1055	0.09537	0.10593	0.820419	1631	0	-2.1055
CCDC169	2	0.40407	0.67755	1	7858	1	-4.5905	0.095374	0.13393	0.820419	1632	0	-4.5905
C4orf29	2	0.35751	0.63921	1	7181	1	-4.5996	0.095433	0.13393	0.820419	1633	0	-4.5996
SKIL	1	0.90444	0.89407	1	15338	0	-2.55	0.095555	0.10593	0.820419	1634	0	-2.55
hsa-mir-5087	1	0.90438	0.89407	1	15337	0	-3.2365	0.095617	0.10593	0.820419	1635	0	-3.2365
C7orf49	4	0.52654	0.87277	1	9573	1	-5.2386	0.095642	0.13595	0.820419	1636	1	-5.2386
FAM120A	2	0.99152	0.98877	1	16834	0	-1.4613	0.095668	0.13393	0.820419	1637	0	-1.4613
C5orf63	2	0.55148	0.76652	1	9916	1	-4.3667	0.095727	0.13393	0.820419	1638	0	-4.3667
PPFIBP1	3	0.39629	0.75581	1	7750	1	-7.096	0.095783	0.12951	0.820419	1639	1	-7.096
PACSIN3	2	0.99229	0.98877	1	16853	0	-0.84136	0.095785	0.13393	0.820419	1640	0	-0.84136
THOC5	3	0.7056	0.89539	1	12147	1	-6.5226	0.095869	0.12951	0.820419	1641	1	-6.5226
PLA2G12B	3	0.99028	0.99306	1	16821	0	-5.0074	0.095956	0.12951	0.820419	1642	1	-5.0074
MTMR7	2	0.75499	0.85977	1	12906	0	-4.0511	0.095962	0.13393	0.820419	1643	0	-4.0511
OR4A5	4	0.028192	0.26962	1	805	3	-9.4741	0.095986	0.13595	0.820419	1644	1	-9.4741
CFHR5	2	0.98968	0.98743	1	16811	0	-1.3205	0.09602	0.13393	0.820419	1645	0	-1.3205
EPHA5	2	0.90591	0.93152	1	15358	0	-3.0666	0.096138	0.13393	0.820419	1646	0	-3.0666
CD36	3	0.87155	0.9468	1	14793	1	-6.7514	0.096216	0.12951	0.820419	1647	1	-6.7514
CPA6	3	0.66837	0.88853	1	11591	1	-7.7272	0.096302	0.12951	0.820419	1648	1	-7.7272
RAET1E	1	0.90367	0.89407	1	15328	0	-2.3141	0.096327	0.10593	0.820419	1649	0	-2.3141
IL1R2	2	0.34287	0.63152	1	6980	1	-4.7067	0.096373	0.13393	0.820419	1650	0	-4.7067
ADAM33	2	0.49247	0.73876	1	9135	1	-4.4767	0.09649	0.13393	0.820419	1651	0	-4.4767
ANKRD34B	3	0.57849	0.85836	1	10277	1	0.17748	0.096562	0.12951	0.820419	1652	1	0.17748
SLC22A10	2	0.78416	0.87461	1	13384	0	-3.8967	0.096608	0.13393	0.820419	1653	0	-3.8967
NFE2	3	0.47016	0.80737	1	8814	1	-5.6503	0.096649	0.12951	0.820419	1654	1	-5.6503
MCHR1	1	0.90333	0.89407	1	15325	0	-3.7559	0.096667	0.10593	0.820419	1655	0	-3.7559
PPP2R4	1	0.90321	0.89407	1	15323	0	-2.2005	0.096791	0.10593	0.820419	1656	0	-2.2005
LCN12	5	0.87823	0.9814	1	14909	1	-6.1054	0.096794	0.14528	0.820419	1657	1	-6.1054
MRPL24	1	0.90315	0.89407	1	15321	0	-2.1476	0.096852	0.10593	0.820419	1658	0	-2.1476
ITGB6	1	0.90305	0.89407	1	15319	0	-3.3169	0.096945	0.10593	0.820419	1659	0	-3.3169
CSB-PGBD3	2	0.31253	0.60706	1	6572	1	-4.0289	0.097077	0.13393	0.820419	1660	0	-4.0289
TMEM41B	3	0.99218	0.99373	1	16848	0	-2.5025	0.097082	0.12951	0.820419	1661	1	-2.5025
hsa-mir-541	1	0.90281	0.89407	1	15316	0	-2.4781	0.097192	0.10593	0.820419	1662	0	-2.4781
SLC6A5	4	0.0043292	0.077983	1	131	3	-9.8286	0.097245	0.13595	0.820419	1663	1	-9.8286
hsa-mir-3065	2	0.10901	0.36331	1	2727	1	-5.1334	0.097253	0.13393	0.820419	1664	0	-5.1334
ZNF154	3	0.45633	0.79492	1	8613	1	-7.8611	0.097255	0.12951	0.820419	1665	1	-7.8611
TMEM81	2	0.86478	0.91692	1	14679	0	-3.7457	0.097371	0.13393	0.820419	1666	0	-3.7457
C5	2	0.10971	0.3649	1	2737	1	-5.1381	0.09743	0.13393	0.820419	1667	0	-5.1381
WDR27	1	0.90253	0.89407	1	15313	0	-3.8062	0.09747	0.10593	0.820419	1668	0	-3.8062
ZNF318	2	0.66045	0.81375	1	11477	1	-4.2085	0.097547	0.13393	0.820419	1669	0	-4.2085
PGAM4	1	0.90244	0.89407	1	15311	0	-2.6172	0.097563	0.10593	0.820419	1670	0	-2.6172
MESDC1	1	0.90231	0.892	1	15310	0	-1.3489	0.097686	0.108	0.820419	1671	0	-1.3489
CHPF2	2	0.016764	0.091551	1	479	1	-5.5233	0.097723	0.13393	0.820419	1672	0	-5.5233
PLCXD2	3	0.048179	0.28408	1	1328	2	-9.2816	0.097774	0.12951	0.820419	1673	1	-9.2816
TXNRD3	2	0.95679	0.96479	1	16242	0	-2.7587	0.09784	0.13393	0.820419	1674	0	-2.7587
INHBC	3	0.61396	0.86952	1	10782	1	-4.707	0.097947	0.12951	0.820419	1675	1	-4.707
NUCKS1	2	0.12636	0.40741	1	3127	1	-5.1091	0.098016	0.13393	0.820419	1676	0	-5.1091
OR9Q1	2	0.7382	0.85211	1	12636	1	-4.0458	0.098075	0.13393	0.820419	1677	0	-4.0458
DNAJA3	1	0.90179	0.89	1	15303	0	-3.3795	0.098212	0.11	0.820419	1678	0	-3.3795
CXorf58	4	0.3985	0.82443	1	7784	1	-7.1312	0.098275	0.13595	0.820419	1679	1	-7.1312
OR6C4	1	0.9017	0.89	1	15302	0	-1.4413	0.098304	0.11	0.820419	1680	0	-1.4413
SH2D1B	2	0.3831	0.66224	1	7549	1	-4.6833	0.098427	0.13764	0.820419	1681	0	-4.6833
HGF	1	0.90157	0.89	1	15301	0	-3.4294	0.098428	0.11	0.820419	1682	0	-3.4294
PIGZ	3	0.36751	0.74078	1	7330	1	-2.1687	0.098466	0.12951	0.820419	1683	1	-2.1687
TMPRSS11F	3	0.52676	0.84218	1	9578	1	-7.5796	0.098553	0.12951	0.820419	1684	1	-7.5796
MSRB2	2	0.3815	0.6607	1	7523	1	-4.6979	0.098662	0.13764	0.820419	1685	0	-4.6979
ERC1	2	0.95422	0.96321	1	16209	0	-2.7826	0.09872	0.13764	0.820419	1686	0	-2.7826
NNMT	4	0.33722	0.7964	1	6900	2	-6.9191	0.098732	0.13595	0.820419	1687	1	-6.9191
NDUFB8	1	0.90114	0.89	1	15294	0	-2.5699	0.09886	0.11	0.820419	1688	0	-2.5699
GLCCI1	2	0.13311	0.42239	1	3280	1	-5.1177	0.098896	0.13764	0.820419	1689	0	-5.1177
APOD	2	0.87045	0.91932	1	14780	0	-3.6292	0.098955	0.13764	0.820419	1690	0	-3.6292
HIST1H4L	4	0.27019	0.73568	1	5967	3	-8.261	0.09896	0.13595	0.820419	1691	1	-8.261
CCDC129	3	0.94903	0.97562	1	16097	0	-5.1414	0.098985	0.12951	0.820419	1692	1	-5.1414
BZW2	1	0.90099	0.89	1	15289	0	-2.3392	0.099015	0.11	0.820419	1693	0	-2.3392
PRPS2	2	0.46591	0.71885	1	8751	1	-4.5613	0.099131	0.13764	0.820419	1694	0	-4.5613
GPR52	2	0.92742	0.94373	1	15716	0	-1.1339	0.099248	0.13764	0.820419	1695	0	-1.1339
KCNN3	1	0.90074	0.89	1	15287	0	-1.8824	0.099262	0.11	0.820419	1696	0	-1.8824
KIAA0895L	1	0.90071	0.89	1	15286	0	-3.5604	0.099293	0.11	0.820419	1697	0	-3.5604
ARMC3	2	0.9638	0.96776	1	16351	0	-2.7785	0.099365	0.13764	0.820419	1698	0	-2.7785
NEDD8-MDP1	1	0.90058	0.89	1	15284	0	-2.2968	0.099416	0.11	0.820419	1699	0	-2.2968
CDT1	1	0.90052	0.89	1	15282	0	-2.3058	0.099478	0.11	0.820419	1700	0	-2.3058
hsa-mir-4264	2	0.8368	0.90709	1	14245	0	-3.7762	0.099483	0.13764	0.820419	1701	0	-3.7762
PDE1C	2	0.22992	0.54667	1	5261	1	-4.9378	0.099541	0.13764	0.820419	1702	0	-4.9378
SEC16B	1	0.90034	0.89	1	15280	0	-3.0023	0.099663	0.11	0.820419	1703	0	-3.0023
ACSM2A	3	0.98029	0.98659	1	16652	0	-5.766	0.099676	0.13488	0.820419	1704	1	-5.766
IL17RE	2	0.2316	0.54979	1	5299	1	-4.9512	0.099717	0.13764	0.820419	1705	0	-4.9512
FAM196B	4	0.041398	0.33048	1	1141	3	-8.4355	0.099874	0.13595	0.820419	1706	1	-8.4355
hsa-mir-1273f	1	0.90012	0.89	1	15279	0	-3.0707	0.09988	0.11	0.820419	1707	0	-3.0707
ACAA1	1	0.90009	0.89	1	15278	0	-2.8981	0.09991	0.11	0.820419	1708	0	-2.8981
hsa-mir-6838	3	0.29572	0.69251	1	6331	2	-8.2484	0.099936	0.13488	0.820419	1709	1	-8.2484
TBPL2	1	0.90006	0.89	1	15277	0	-2.4865	0.099941	0.11	0.820419	1710	0	-2.4865
TBCCD1	1	0.9	0.89	1	15275	0	-2.4065	0.1	0.11	0.820419	1711	0	-2.4065
IL6	2	0.80024	0.88602	1	13652	0	-3.9143	0.10013	0.13764	0.820419	1712	0	-3.9143
hsa-mir-1208	2	0.86752	0.91692	1	14715	0	-3.4824	0.10024	0.13764	0.820419	1713	0	-3.4824
FGF21	1	0.89975	0.89	1	15269	0	-3.0585	0.10025	0.11	0.820419	1714	0	-3.0585
HAPLN4	2	0.92379	0.93979	1	15656	0	-3.3468	0.1003	0.13764	0.820419	1715	0	-3.3468
DUSP22	4	0.16765	0.60274	1	4018	3	-8.5264	0.10033	0.13595	0.820419	1716	1	-8.5264
hsa-mir-1302-3	1	0.89966	0.89	1	15267	0	-2.1631	0.10034	0.11	0.820419	1717	0	-2.1631
ARID2	2	0.98847	0.98696	1	16790	0	-0.88609	0.10036	0.13764	0.820419	1718	0	-0.88609
hsa-mir-326	1	0.8996	0.89	1	15265	0	-3.8007	0.1004	0.11	0.820419	1719	0	-3.8007
AGAP11	2	0.83382	0.9046	1	14206	0	-3.8102	0.10042	0.13764	0.820419	1720	0	-3.8102
TMEM155	1	0.89953	0.89	1	15264	0	-1.6841	0.10047	0.11	0.820419	1721	0	-1.6841
PDE6D	1	0.89944	0.89	1	15263	0	-2.9765	0.10056	0.11	0.820419	1722	0	-2.9765
FOXRED2	2	0.98953	0.98743	1	16809	0	-1.5459	0.1006	0.13764	0.820419	1723	0	-1.5459
PPP1R12C	3	0.19671	0.60432	1	4601	1	-6.4356	0.10071	0.14024	0.820419	1724	1	-6.4356
NDUFS6	1	0.89926	0.88798	1	15261	0	-2.9173	0.10074	0.11202	0.820419	1725	0	-2.9173
hsa-mir-4677	2	0.92067	0.93877	1	15603	0	-2.7929	0.10089	0.13764	0.820419	1726	0	-2.7929
hsa-mir-671	1	0.8991	0.88798	1	15259	0	-3.079	0.1009	0.11202	0.820419	1727	0	-3.079
PRELID1	1	0.89904	0.88798	1	15258	0	-3.8947	0.10096	0.11202	0.820419	1728	0	-3.8947
LIMK1	2	0.81728	0.89409	1	13930	0	-3.8826	0.10106	0.13764	0.820419	1729	0	-3.8826
AKR1C1	4	0.91226	0.97357	1	15466	1	-3.4823	0.10113	0.13595	0.820419	1730	1	-3.4823
hsa-mir-545	1	0.89882	0.88798	1	15255	0	-1.6948	0.10118	0.11202	0.820419	1731	0	-1.6948
NFIC	2	0.54608	0.76501	1	9834	1	-4.4721	0.10118	0.13764	0.820419	1732	0	-4.4721
DYDC1	2	0.95067	0.96321	1	16135	0	-3.0631	0.10124	0.13764	0.820419	1733	0	-3.0631
C7orf26	1	0.89865	0.88798	1	15254	0	-3.0761	0.10135	0.11202	0.820419	1734	0	-3.0761
hsa-mir-1256	2	0.732	0.84598	1	12541	1	-4.11	0.10142	0.13764	0.820419	1735	0	-4.11
BOLA3	2	0.70289	0.83373	1	12097	1	-3.6583	0.10147	0.13764	0.820419	1736	0	-3.6583
SLC25A16	1	0.89836	0.88798	1	15249	0	-3.6306	0.10164	0.11202	0.820419	1737	0	-3.6306
PSMB2	1	0.89811	0.88798	1	15244	0	-3.0989	0.10189	0.11202	0.820419	1738	0	-3.0989
RWDD4	1	0.89805	0.88798	1	15242	0	-3.246	0.10195	0.11202	0.820419	1739	0	-3.246
GPX1	1	0.89799	0.88798	1	15241	0	-2.6387	0.10201	0.11202	0.820419	1740	0	-2.6387
LRFN2	1	0.89796	0.88798	1	15239	0	-2.3277	0.10204	0.11202	0.820419	1741	0	-2.3277
CDC25C	2	0.16801	0.47322	1	4024	1	-5.0999	0.10206	0.13764	0.820419	1742	0	-5.0999
KIAA1107	1	0.89793	0.88798	1	15238	0	-3.6413	0.10207	0.11202	0.820419	1743	0	-3.6413
GCFC2	1	0.8979	0.88798	1	15237	0	-2.568	0.1021	0.11202	0.820419	1744	0	-2.568
PLXNA1	2	0.72973	0.84447	1	12505	1	-4.1463	0.10212	0.13764	0.820419	1745	0	-4.1463
FOXL1	3	0.29531	0.69119	1	6325	2	-8.6465	0.10227	0.151	0.820419	1746	1	-8.6465
NFE2L3	2	0.97562	0.97532	1	16577	0	-1.5573	0.10229	0.13764	0.820419	1747	0	-1.5573
IL27RA	1	0.89759	0.88798	1	15233	0	-1.636	0.10241	0.11202	0.820419	1748	0	-1.636
WDR66	2	0.82263	0.89938	1	14014	0	-3.9034	0.10247	0.13764	0.820419	1749	0	-3.9034
TRPV6	3	0.56053	0.85401	1	10053	1	-5.3746	0.10261	0.151	0.820419	1750	1	-5.3746
DCAF4L2	1	0.89737	0.88798	1	15230	0	-2.3207	0.10263	0.11202	0.820419	1751	0	-2.3207
SLC16A2	3	0.39668	0.75581	1	7755	2	-8.2334	0.1027	0.151	0.820419	1752	1	-8.2334
hsa-mir-1253	3	0.83413	0.93056	1	14210	1	-6.6907	0.10278	0.151	0.820419	1753	1	-6.6907
TRAIP	2	0.44733	0.70355	1	8486	1	-4.7052	0.10282	0.13764	0.820419	1754	0	-4.7052
hsa-mir-3136	1	0.89712	0.88798	1	15228	0	-1.9085	0.10288	0.11202	0.820419	1755	0	-1.9085
SPACA1	2	0.50485	0.74347	1	9297	1	-4.6008	0.10288	0.13764	0.820419	1756	0	-4.6008
KPNA6	2	0.1308	0.4166	1	3234	1	-5.2171	0.10294	0.13764	0.820419	1757	0	-5.2171
HERC3	3	0.36575	0.74078	1	7308	2	-8.4219	0.10296	0.151	0.820419	1758	1	-8.4219
MTOR	2	0.84276	0.90836	1	14344	0	-3.433	0.103	0.13764	0.820419	1759	0	-3.433
IKBIP	1	0.897	0.88798	1	15227	0	-2.983	0.103	0.11202	0.820419	1760	0	-2.983
CEP170	1	0.89675	0.88798	1	15224	0	-1.4137	0.10325	0.11202	0.820419	1761	0	-1.4137
hsa-mir-15b	2	0.56596	0.77104	1	10132	1	-4.4767	0.10329	0.13764	0.820419	1762	0	-4.4767
IMMT	2	0.83884	0.90836	1	14284	0	-4.0062	0.10352	0.13764	0.820419	1763	0	-4.0062
ROS1	2	0.23041	0.54667	1	5268	1	-4.8709	0.10358	0.13764	0.820419	1764	0	-4.8709
GTF2IRD1	2	0.84885	0.91209	1	14446	0	-3.78	0.10364	0.13764	0.820419	1765	0	-3.78
VWDE	3	0.98355	0.98823	1	16716	0	-0.29145	0.10364	0.151	0.820419	1766	1	-0.29145
EAF2	1	0.89635	0.88798	1	15216	0	-2.969	0.10365	0.11202	0.820419	1767	0	-2.969
TEX29	2	0.89614	0.92828	1	15213	0	-3.71	0.10376	0.13764	0.820419	1768	0	-3.71
PGLS	3	0.16622	0.554	1	3993	1	-5.2434	0.10382	0.151	0.820419	1769	1	-5.2434
ZSCAN9	1	0.8961	0.88798	1	15212	0	-3.7122	0.1039	0.11202	0.820419	1770	0	-3.7122
hsa-mir-3118-4	2	0.18995	0.49802	1	4445	1	-5.0668	0.10399	0.13764	0.820419	1771	0	-5.0668
SIPA1L2	1	0.89595	0.88798	1	15210	0	-3.2245	0.10405	0.11202	0.820419	1772	0	-3.2245
KIN	3	0.10451	0.42496	1	2624	1	-4.0354	0.10408	0.151	0.820419	1773	1	-4.0354
RSF1	3	0.25216	0.65588	1	5701	2	-8.5226	0.10416	0.151	0.820419	1774	1	-8.5226
SRP14	3	0.34016	0.72625	1	6938	2	-8.506	0.10425	0.151	0.820419	1775	1	-8.506
RSU1	4	0.126	0.53092	1	3119	3	-9.0124	0.10432	0.1494	0.820419	1776	1	-9.0124
MATR3	1	0.89567	0.88798	1	15204	0	-2.567	0.10433	0.11202	0.820419	1777	0	-2.567
SRSF11	3	0.46944	0.80737	1	8799	1	-7.4382	0.10433	0.151	0.820419	1778	1	-7.4382
AIP	1	0.89552	0.88798	1	15201	0	-2.8824	0.10448	0.11202	0.820419	1779	0	-2.8824
ELL3	1	0.89549	0.88798	1	15199	0	-2.6123	0.10451	0.11202	0.820419	1780	0	-2.6123
CCDC176	2	0.86071	0.9145	1	14621	0	-3.7552	0.10452	0.14146	0.820419	1781	0	-3.7552
NLRC5	1	0.89539	0.88798	1	15198	0	-2.445	0.10461	0.11202	0.820419	1782	0	-2.445
P2RX2	2	0.63135	0.80315	1	11052	1	-4.424	0.10463	0.14146	0.820419	1783	0	-4.424
hsa-mir-155	2	0.90636	0.93364	1	15367	0	-3.2703	0.10475	0.14146	0.820419	1784	0	-3.2703
MOAP1	1	0.89524	0.88798	1	15197	0	-3.1669	0.10476	0.11202	0.820419	1785	0	-3.1669
ABCA7	1	0.89518	0.88798	1	15195	0	-2.5093	0.10482	0.11202	0.820419	1786	0	-2.5093
ZNF41	2	0.5042	0.74347	1	9287	1	-3.972	0.10493	0.14146	0.820419	1787	0	-3.972
hsa-mir-196b	3	0.87545	0.94769	1	14851	0	-7.6802	0.10502	0.151	0.820419	1788	1	-7.6802
RALA	1	0.89496	0.88798	1	15192	0	-2.9037	0.10504	0.11202	0.820419	1789	0	-2.9037
SLC10A6	2	0.42604	0.69441	1	8177	1	-4.7647	0.1051	0.14146	0.820419	1790	0	-4.7647
SAMD11	1	0.89484	0.88798	1	15189	0	-4.1315	0.10516	0.11202	0.820419	1791	0	-4.1315
RNASE11	1	0.89475	0.88798	1	15186	0	-1.8577	0.10525	0.11202	0.820419	1792	0	-1.8577
CHRNA9	1	0.89471	0.88798	1	15184	0	-2.383	0.10529	0.11202	0.820419	1793	0	-2.383
CFDP1	1	0.89456	0.88589	1	15182	0	-2.1426	0.10544	0.11411	0.820419	1794	0	-2.1426
EMC7	1	0.8945	0.88589	1	15181	0	-3.2615	0.1055	0.11411	0.820419	1795	0	-3.2615
CHRNA4	1	0.89444	0.88589	1	15179	0	-3.2628	0.10556	0.11411	0.820419	1796	0	-3.2628
CHST15	2	0.59063	0.78623	1	10442	1	-4.4855	0.10569	0.14146	0.820419	1797	0	-4.4855
FAM174A	3	0.99731	0.99722	1	16948	0	-3.6752	0.10571	0.151	0.820419	1798	1	-3.6752
AWAT2	1	0.89421	0.88589	1	15177	0	-3.2726	0.10579	0.11411	0.820419	1799	0	-3.2726
BMP15	2	0.25108	0.57318	1	5680	1	-5.026	0.1058	0.14146	0.820419	1800	0	-5.026
CETN2	1	0.89413	0.88589	1	15173	0	-2.236	0.10587	0.11411	0.820419	1801	0	-2.236
EIF5AL1	2	0.93032	0.9457	1	15765	0	-3.4986	0.10592	0.14146	0.820419	1802	0	-3.4986
FANCE	1	0.894	0.88589	1	15172	0	-2.9694	0.106	0.11411	0.820419	1803	0	-2.9694
GTF2IRD2B	2	0.94413	0.95658	1	16012	0	-3.0674	0.10621	0.14146	0.820419	1804	0	-3.0674
PTAR1	3	0.61886	0.87208	1	10858	1	-5.8376	0.10623	0.151	0.820419	1805	1	-5.8376
FEZ1	1	0.89376	0.88589	1	15169	0	-3.9614	0.10624	0.11411	0.820419	1806	0	-3.9614
CLEC12A	4	0.20009	0.65236	1	4671	2	-7.8768	0.10625	0.1494	0.820419	1807	1	-7.8768
SRPK2	1	0.8937	0.88589	1	15167	0	-3.7863	0.1063	0.11411	0.820419	1808	0	-3.7863
C3orf84	5	0.27279	0.77923	1	6004	3	-7.6627	0.10643	0.16099	0.820419	1809	1	-7.6627
LRP6	1	0.89354	0.88589	1	15164	0	-1.6104	0.10646	0.11411	0.820419	1810	0	-1.6104
GEM	3	0.113	0.44743	1	2809	1	-6.2043	0.10648	0.151	0.820419	1811	1	-6.2043
hsa-mir-670	1	0.89345	0.88589	1	15163	0	-1.9275	0.10655	0.11411	0.820419	1812	0	-1.9275
SLC25A31	1	0.89342	0.88589	1	15161	0	-4.1248	0.10658	0.11411	0.820419	1813	0	-4.1248
SCAMP4	4	0.96135	0.98698	1	16309	0	-5.3447	0.10659	0.1494	0.820419	1814	1	-5.3447
GSG1	1	0.89326	0.88589	1	15159	0	-3.1114	0.10674	0.11411	0.820419	1815	0	-3.1114
FAM53A	2	0.34031	0.63	1	6941	1	-4.9302	0.1068	0.14146	0.820419	1816	0	-4.9302
USP17L4	1	0.8932	0.88589	1	15157	0	-1.7521	0.1068	0.11411	0.820419	1817	0	-1.7521
GPR39	2	0.75907	0.86123	1	12970	0	-4.1258	0.10691	0.14146	0.820419	1818	0	-4.1258
C7orf43	2	0.94551	0.95743	1	16039	0	-3.2488	0.10697	0.14146	0.820419	1819	0	-3.2488
LIPM	1	0.89302	0.88589	1	15154	0	-4.1945	0.10698	0.11411	0.820419	1820	0	-4.1945
MDM1	3	0.53029	0.84218	1	9626	1	-6.0973	0.107	0.151	0.820419	1821	1	-6.0973
ITGA5	1	0.89283	0.88589	1	15151	0	-2.9527	0.10717	0.11411	0.820419	1822	0	-2.9527
SYTL1	1	0.89252	0.88383	1	15146	0	-2.7636	0.10748	0.11617	0.820419	1823	0	-2.7636
OR2T35	1	0.8924	0.88383	1	15143	0	-3.3622	0.1076	0.11617	0.820419	1824	0	-3.3622
PKD2	3	0.8959	0.95342	1	15208	0	-7.4295	0.1076	0.151	0.820419	1825	1	-7.4295
RECQL4	2	0.9042	0.93152	1	15334	0	-3.6248	0.10761	0.14146	0.820419	1826	0	-3.6248
TRIM71	2	0.98486	0.98457	1	16739	0	-2.4842	0.10767	0.14146	0.820419	1827	0	-2.4842
FAM50B	1	0.89224	0.88383	1	15139	0	-2.2473	0.10776	0.11617	0.820419	1828	0	-2.2473
LPHN3	1	0.89215	0.88383	1	15137	0	-2.6951	0.10785	0.11617	0.820419	1829	0	-2.6951
C1orf64	3	0.28525	0.68585	1	6184	1	-7.8858	0.10812	0.151	0.820419	1830	1	-7.8858
ZNF98	1	0.89184	0.88383	1	15134	0	-3.1395	0.10816	0.11617	0.820419	1831	0	-3.1395
MAML3	1	0.89175	0.88383	1	15133	0	-2.9337	0.10825	0.11617	0.820419	1832	0	-2.9337
CAPNS1	2	0.60303	0.78932	1	10616	1	-3.9526	0.10825	0.14146	0.820419	1833	0	-3.9526
NUBP1	1	0.89169	0.88383	1	15130	0	-1.4478	0.10831	0.11617	0.820419	1834	0	-1.4478
CUL7	2	0.96352	0.96776	1	16346	0	-2.8301	0.10831	0.14146	0.820419	1835	0	-2.8301
ODF2L	1	0.89166	0.88383	1	15129	0	-3.1167	0.10834	0.11617	0.820419	1836	0	-3.1167
CDKAL1	2	0.24207	0.56699	1	5508	1	-5.1848	0.10837	0.14146	0.820419	1837	0	-5.1848
hsa-mir-4463	1	0.8916	0.88383	1	15128	0	-2.0828	0.1084	0.11617	0.820419	1838	0	-2.0828
OR3A2	1	0.8915	0.88383	1	15126	0	-3.5134	0.1085	0.11617	0.820419	1839	0	-3.5134
ZNF205	4	0.53772	0.88012	1	9722	1	-6.486	0.10852	0.1494	0.820419	1840	1	-6.486
hsa-mir-6883	2	0.12099	0.39558	1	3004	1	-5.3154	0.1086	0.14146	0.820419	1841	0	-5.3154
KCTD20	5	0.019634	0.26669	1	560	3	-7.1528	0.10869	0.16885	0.820419	1842	1	-7.1528
ZNF747	1	0.89129	0.88383	1	15124	0	-4.0979	0.10871	0.11617	0.820419	1843	0	-4.0979
STYX	3	0.47649	0.80967	1	8910	2	-8.2348	0.10872	0.151	0.820419	1844	1	-8.2348
hsa-mir-1252	2	0.83402	0.90583	1	14209	0	-3.4843	0.10872	0.14519	0.820419	1845	0	-3.4843
AASDH	1	0.89126	0.88383	1	15123	0	-2.8152	0.10874	0.11617	0.820419	1846	0	-2.8152
SLC16A1	1	0.89119	0.88383	1	15122	0	-3.5218	0.10881	0.11617	0.820419	1847	0	-3.5218
C5orf64	2	0.33478	0.62392	1	6866	1	-4.8635	0.10884	0.14519	0.820419	1848	0	-4.8635
TRIM28	4	0.063155	0.40828	1	1698	3	-9.2775	0.10886	0.1494	0.820419	1849	1	-9.2775
LCE3D	1	0.8911	0.88383	1	15120	0	-3.0601	0.1089	0.11617	0.820419	1850	0	-3.0601
NOX3	2	0.20704	0.51748	1	4806	1	-5.0729	0.10901	0.14519	0.820419	1851	0	-5.0729
PRKRA	3	0.59067	0.86179	1	10443	1	-6.2344	0.10906	0.151	0.820419	1852	1	-6.2344
TNFAIP8L1	1	0.89085	0.88383	1	15118	0	-4.2925	0.10915	0.11617	0.820419	1853	0	-4.2925
SART3	1	0.89076	0.88383	1	15117	0	-3.4472	0.10924	0.11617	0.820419	1854	0	-3.4472
SMU1	1	0.89076	0.88383	1	15116	0	-3.4472	0.10924	0.11617	0.820419	1855	0	-3.4472
hsa-mir-3679	1	0.89061	0.88383	1	15113	0	-3.1421	0.10939	0.11617	0.820419	1856	0	-3.1421
EFTUD1	1	0.89048	0.88383	1	15111	0	-2.423	0.10952	0.11617	0.820419	1857	0	-2.423
C4B_2	2	0.66843	0.81683	1	11593	1	-4.3576	0.10954	0.14519	0.820419	1858	0	-4.3576
UGT2A1	4	0.26224	0.73337	1	5857	3	-6.0519	0.10954	0.1494	0.820419	1859	1	-6.0519
SNRPB2	4	0.5695	0.89018	1	10175	2	-7.9186	0.10965	0.1494	0.820419	1860	1	-7.9186
CRISP3	1	0.89024	0.88383	1	15109	0	-3.9109	0.10976	0.11617	0.820419	1861	0	-3.9109
KCTD7	1	0.89021	0.88383	1	15108	0	-3.9112	0.10979	0.11617	0.820419	1862	0	-3.9112
TVP23A	2	0.28944	0.5916	1	6241	1	-4.9667	0.10983	0.14519	0.820419	1863	0	-4.9667
TGFBR3L	1	0.89014	0.88383	1	15106	0	-3.0359	0.10986	0.11617	0.820419	1864	0	-3.0359
TCEAL8	3	0.42347	0.77604	1	8139	2	-8.3628	0.10992	0.15646	0.820419	1865	1	-8.3628
SCOC	2	0.85646	0.9145	1	14562	0	-3.6614	0.10995	0.14519	0.820419	1866	0	-3.6614
C22orf39	1	0.89002	0.88383	1	15102	0	-2.4551	0.10998	0.11617	0.820419	1867	0	-2.4551
hsa-mir-644a	1	0.88987	0.88383	1	15099	0	-3.9214	0.11013	0.11617	0.820419	1868	0	-3.9214
SURF2	1	0.8898	0.88383	1	15097	0	-2.2496	0.1102	0.11617	0.820419	1869	0	-2.2496
INTS12	3	0.59209	0.86179	1	10468	1	-7.412	0.11026	0.15646	0.820419	1870	1	-7.412
SLC25A28	1	0.88971	0.88383	1	15095	0	-3.5094	0.11029	0.11617	0.820419	1871	0	-3.5094
UBXN1	3	0.77565	0.91595	1	13242	1	-6.1558	0.11035	0.15646	0.820419	1872	1	-6.1558
GNB5	3	0.96941	0.98204	1	16462	0	-5.0664	0.11043	0.15646	0.820419	1873	1	-5.0664
LRRC7	2	0.61734	0.79697	1	10835	1	-4.592	0.11047	0.14519	0.820419	1874	0	-4.592
IRAK3	1	0.88937	0.88383	1	15090	0	-3.4607	0.11063	0.11617	0.820419	1875	0	-3.4607
C1QL2	3	0.96659	0.98076	1	16408	0	-6.1683	0.11086	0.15646	0.820419	1876	1	-6.1683
KCNH6	1	0.88903	0.88383	1	15084	0	-3.3276	0.11097	0.11617	0.820419	1877	0	-3.3276
CSNK2B	1	0.88897	0.88383	1	15083	0	-4.1367	0.11103	0.11617	0.820419	1878	0	-4.1367
DIDO1	2	0.55404	0.76652	1	9958	1	-4.6077	0.11111	0.14519	0.820419	1879	0	-4.6077
C3orf79	3	0.71252	0.8979	1	12235	1	-6.7441	0.1112	0.16182	0.820419	1880	1	-6.7441
EMR2	1	0.88878	0.88383	1	15082	0	-3.9351	0.11122	0.11617	0.820419	1881	0	-3.9351
PPP1R2	4	0.99051	0.99529	1	16825	0	-4.42	0.11124	0.1494	0.820419	1882	1	-4.42
HIRIP3	1	0.88863	0.88383	1	15081	0	-3.9479	0.11137	0.11617	0.820419	1883	0	-3.9479
P4HA1	1	0.88857	0.88383	1	15078	0	-3.1614	0.11143	0.11617	0.820419	1884	0	-3.1614
SERPINB5	2	0.84653	0.90963	1	14409	0	-3.888	0.11146	0.14519	0.820419	1885	0	-3.888
APEH	3	0.66454	0.88768	1	11531	1	-7.8491	0.11146	0.16182	0.820419	1886	1	-7.8491
PHOSPHO2	4	0.74602	0.94701	1	12760	1	-4.4039	0.11146	0.1494	0.820419	1887	1	-4.4039
FTSJD1	1	0.88848	0.88383	1	15077	0	-2.7166	0.11152	0.11617	0.820419	1888	0	-2.7166
XPNPEP1	3	0.80259	0.92288	1	13684	1	-4.8505	0.11155	0.16182	0.820419	1889	1	-4.8505
NEK4	1	0.88844	0.88383	1	15076	0	-1.6064	0.11156	0.11617	0.820419	1890	0	-1.6064
PIK3CA	4	0.024815	0.25123	1	706	3	-9.7535	0.11169	0.1494	0.820419	1891	1	-9.7535
LOC100130301	2	0.55988	0.768	1	10045	1	-3.6304	0.11169	0.14519	0.820419	1892	0	-3.6304
POLL	3	0.93187	0.97062	1	15793	0	-5.7608	0.1118	0.16182	0.820419	1893	1	-5.7608
FOSB	3	0.87554	0.94769	1	14854	0	-7.4581	0.11189	0.16182	0.820419	1894	1	-7.4581
hsa-mir-3150a	2	0.93519	0.94854	1	15850	0	-3.5537	0.11198	0.14519	0.820419	1895	0	-3.5537
PITX3	2	0.83953	0.90836	1	14296	0	-3.6765	0.11204	0.14519	0.820419	1896	0	-3.6765
MRPL16	2	0.5272	0.7573	1	9582	1	-4.683	0.1121	0.14519	0.820419	1897	0	-4.683
RASL10A	2	0.94196	0.95397	1	15964	0	-3.4832	0.11216	0.14519	0.820419	1898	0	-3.4832
TBC1D10B	2	0.9926	0.9896	1	16862	0	-0.76393	0.11222	0.14519	0.820419	1899	0	-0.76393
ZNF483	2	0.93232	0.94663	1	15799	0	-3.0766	0.11233	0.14519	0.820419	1900	0	-3.0766
OR4D9	1	0.88746	0.88182	1	15063	0	-2.8202	0.11254	0.11818	0.820419	1901	0	-2.8202
CNNM2	3	0.75139	0.90819	1	12841	1	-6.1148	0.11257	0.16723	0.820419	1902	1	-6.1148
ARID1A	2	0.98875	0.98697	1	16797	0	-1.3536	0.11274	0.14519	0.820419	1903	0	-1.3536
ITPKC	2	0.99612	0.99301	1	16927	0	-0.62071	0.11286	0.14519	0.820419	1904	0	-0.62071
LHPP	2	0.98855	0.98696	1	16792	0	-1.5844	0.11292	0.14519	0.820419	1905	0	-1.5844
OR52N1	3	0.004776	0.061218	1	140	2	-10.42	0.113	0.17269	0.820419	1906	1	-10.42
HRG	1	0.88693	0.88182	1	15056	0	-3.2348	0.11307	0.11818	0.820419	1907	0	-3.2348
hsa-mir-4454	2	0.40006	0.67297	1	7804	1	-4.8887	0.11309	0.14519	0.820419	1908	0	-4.8887
IDH3G	2	0.9071	0.93364	1	15377	0	-2.7728	0.11315	0.14519	0.820419	1909	0	-2.7728
TWF1	2	0.034023	0.14744	1	959	1	-5.6384	0.11321	0.14519	0.820419	1910	0	-5.6384
IGLON5	1	0.88675	0.88182	1	15053	0	-3.6259	0.11325	0.11818	0.820419	1911	0	-3.6259
RBCK1	2	0.77681	0.86873	1	13261	0	-4.2541	0.11326	0.14519	0.820419	1912	0	-4.2541
TXNDC11	4	0.11947	0.51695	1	2962	3	-8.8628	0.11327	0.1494	0.820419	1913	1	-8.8628
ARGLU1	1	0.8867	0.88182	1	15052	0	-3.6264	0.1133	0.11818	0.820419	1914	0	-3.6264
PPP1R1C	3	0.48513	0.81759	1	9030	1	-6.0207	0.11334	0.17269	0.820419	1915	1	-6.0207
MALL	1	0.88665	0.88182	1	15050	0	-1.9768	0.11335	0.11818	0.820419	1916	0	-1.9768
ENPEP	2	0.62988	0.80315	1	11028	1	-4.6006	0.11338	0.14519	0.820419	1917	0	-4.6006
MFRP	1	0.88653	0.88182	1	15049	0	-3.1196	0.11347	0.11818	0.820419	1918	0	-3.1196
DUSP15	1	0.8865	0.88182	1	15048	0	-3.1983	0.1135	0.11818	0.820419	1919	0	-3.1983
DNPH1	1	0.88647	0.88182	1	15046	0	-4.0136	0.11353	0.11818	0.820419	1920	0	-4.0136
hsa-mir-22	1	0.88641	0.88182	1	15045	0	-3.3877	0.11359	0.11818	0.820419	1921	0	-3.3877
DDTL	2	0.21631	0.52906	1	4980	1	-5.217	0.11361	0.14519	0.820419	1922	0	-5.217
ERCC8	1	0.88637	0.88182	1	15044	0	-2.8689	0.11363	0.11818	0.820419	1923	0	-2.8689
AGXT	2	0.69355	0.82763	1	11961	1	-4.372	0.11373	0.14519	0.820419	1924	0	-4.372
LRP10	3	0.82987	0.92972	1	14147	1	-7.4988	0.11377	0.17269	0.820419	1925	1	-7.4988
RERGL	1	0.88622	0.88182	1	15042	0	-2.802	0.11378	0.11818	0.820419	1926	0	-2.802
CCR8	1	0.88607	0.88182	1	15038	0	-2.5994	0.11393	0.11818	0.820419	1927	0	-2.5994
RHOQ	1	0.88604	0.88182	1	15037	0	-2.3253	0.11396	0.11818	0.820419	1928	0	-2.3253
OSER1	1	0.886	0.88182	1	15036	0	-3.65	0.114	0.11818	0.820419	1929	0	-3.65
TCFL5	2	0.51338	0.75123	1	9404	1	-4.8846	0.11402	0.14519	0.820419	1930	0	-4.8846
UNC119B	3	0.77705	0.91595	1	13265	1	-1.9429	0.11403	0.17269	0.820419	1931	1	-1.9429
hsa-mir-4672	1	0.88591	0.88182	1	15033	0	-4.027	0.11409	0.11818	0.820419	1932	0	-4.027
PRKACA	1	0.88576	0.88182	1	15031	0	-1.8137	0.11424	0.11818	0.820419	1933	0	-1.8137
ZBTB33	2	0.97896	0.97902	1	16627	0	-2.5607	0.11425	0.14519	0.820419	1934	0	-2.5607
FAM195B	1	0.88563	0.88182	1	15030	0	-4.0351	0.11437	0.11818	0.820419	1935	0	-4.0351
hsa-mir-2392	1	0.8856	0.88182	1	15028	0	-4.0788	0.1144	0.11818	0.820419	1936	0	-4.0788
FAM157A	1	0.88553	0.88182	1	15025	0	-3.6658	0.11447	0.11818	0.820419	1937	0	-3.6658
MEMO1	1	0.88553	0.88182	1	15026	0	-3.6658	0.11447	0.11818	0.820419	1938	0	-3.6658
MMP11	2	0.99422	0.99199	1	16890	0	-1.3689	0.11454	0.14519	0.820419	1939	0	-1.3689
CCDC17	2	0.97633	0.97722	1	16589	0	-1.9843	0.1146	0.14519	0.820419	1940	0	-1.9843
C19orf25	3	0.92527	0.96817	1	15677	0	-5.1739	0.11463	0.17269	0.820419	1941	1	-5.1739
ZC3H12A	2	0.99646	0.99427	1	16936	0	-0.59264	0.11466	0.14519	0.820419	1942	0	-0.59264
SAMD7	2	0.75655	0.85977	1	12927	0	-3.7435	0.11472	0.14519	0.820419	1943	0	-3.7435
NELL1	1	0.88523	0.88182	1	15023	0	-3.2916	0.11477	0.11818	0.820419	1944	0	-3.2916
hsa-mir-6512	1	0.8852	0.88182	1	15022	0	-4.4966	0.1148	0.11818	0.820419	1945	0	-4.4966
TPSG1	3	0.45491	0.79492	1	8598	1	-6.9001	0.11488	0.17269	0.820419	1946	1	-6.9001
SLC19A3	2	0.99381	0.99123	1	16882	0	-0.98463	0.11489	0.14519	0.820419	1947	0	-0.98463
LCE4A	2	0.17509	0.47992	1	4159	1	-5.3107	0.11495	0.14519	0.820419	1948	0	-5.3107
LOC147646	3	0.20421	0.61319	1	4743	1	-5.6933	0.11497	0.17269	0.820419	1949	1	-5.6933
CDH13	1	0.88502	0.88182	1	15018	0	-3.3126	0.11498	0.11818	0.820419	1950	0	-3.3126
MAPKAP1	1	0.88495	0.88182	1	15016	0	-3.268	0.11505	0.11818	0.820419	1951	0	-3.268
AIM2	3	0.32094	0.71156	1	6676	1	-3.2685	0.11505	0.17269	0.820419	1952	1	-3.2685
hsa-mir-5187	1	0.88465	0.88182	1	15011	0	-2.7675	0.11535	0.11818	0.820419	1953	0	-2.7675
2018-09-10	2	0.0021302	0.018999	1	61	1	-6.0814	0.11536	0.14519	0.820419	1954	0	-6.0814
ZNF792	2	0.33166	0.62237	1	6818	1	-5.0794	0.11542	0.14519	0.820419	1955	0	-5.0794
SLMAP	1	0.88458	0.88182	1	15010	0	-3.0486	0.11542	0.11818	0.820419	1956	0	-3.0486
NT5C2	3	0.44526	0.79297	1	8453	2	-8.1623	0.11548	0.17269	0.820419	1957	1	-8.1623
HECW2	1	0.88446	0.88182	1	15009	0	-2.9584	0.11554	0.11818	0.820419	1958	0	-2.9584
SLC4A9	1	0.88437	0.88182	1	15007	0	-2.412	0.11563	0.11818	0.820419	1959	0	-2.412
SGTA	1	0.88427	0.88182	1	15006	0	-4.4536	0.11573	0.11818	0.820419	1960	0	-4.4536
CUEDC1	3	0.11505	0.45405	1	2861	1	-6.4186	0.11574	0.17269	0.820419	1961	1	-6.4186
hsa-mir-30d	2	0.3234	0.61932	1	6705	1	-5.0277	0.11576	0.14519	0.820419	1962	0	-5.0277
NEU1	3	0.87738	0.94769	1	14889	0	-2.4317	0.11582	0.17269	0.820419	1963	1	-2.4317
LRCH1	2	0.37634	0.65609	1	7450	1	-5.1993	0.11582	0.14519	0.820419	1964	0	-5.1993
CCDC63	1	0.88415	0.88182	1	15005	0	-3.7195	0.11585	0.11818	0.820419	1965	0	-3.7195
SMYD5	1	0.88409	0.88182	1	15004	0	-3.3297	0.11591	0.11818	0.820419	1966	0	-3.3297
HN1	3	0.94914	0.97562	1	16102	0	-5.9898	0.11599	0.17269	0.820419	1967	1	-5.9898
UIMC1	2	0.14091	0.4313	1	3450	1	-5.4953	0.11606	0.14899	0.820419	1968	0	-5.4953
hsa-mir-4418	1	0.88393	0.88182	1	15002	0	-3.1565	0.11607	0.11818	0.820419	1969	0	-3.1565
TAF3	2	0.59288	0.78781	1	10476	1	-4.7649	0.11611	0.14899	0.820419	1970	0	-4.7649
NUDT16	1	0.88384	0.88182	1	15000	0	-3.2369	0.11616	0.11818	0.820419	1971	0	-3.2369
UQCC	3	0.23619	0.64273	1	5391	2	-8.8418	0.11625	0.17269	0.820419	1972	1	-8.8418
GPR123	4	0.20983	0.66671	1	4870	2	-7.7988	0.11632	0.15619	0.820419	1973	1	-7.7988
CEP97	1	0.88366	0.88182	1	14999	0	-3.7411	0.11634	0.11818	0.820419	1974	0	-3.7411
RGR	2	0.8418	0.90836	1	14334	0	-3.8081	0.11635	0.14899	0.820419	1975	0	-3.8081
hsa-mir-5586	2	0.6346	0.80315	1	11090	1	-4.5847	0.1164	0.14899	0.820419	1976	0	-4.5847
CTNNA2	1	0.88359	0.88182	1	14996	0	-4.5187	0.11641	0.11818	0.820419	1977	0	-4.5187
CATSPERG	1	0.88356	0.88182	1	14995	0	-3.2596	0.11644	0.11818	0.820419	1978	0	-3.2596
ARPC4	3	0.061211	0.31839	1	1645	1	-5.7213	0.11651	0.17269	0.820419	1979	1	-5.7213
FYTTD1	1	0.88347	0.88182	1	14994	0	-4.0458	0.11653	0.11818	0.820419	1980	0	-4.0458
A2M	2	0.64682	0.80923	1	11274	1	-4.5305	0.11658	0.14899	0.820419	1981	0	-4.5305
DLD	1	0.88332	0.88182	1	14990	0	-3.3235	0.11668	0.11818	0.820419	1982	0	-3.3235
CD48	1	0.88322	0.88182	1	14988	0	-1.7845	0.11678	0.11818	0.820419	1983	0	-1.7845
ZIC1	2	0.62282	0.79698	1	10916	1	-4.6242	0.11681	0.15282	0.820419	1984	0	-4.6242
TTC9C	2	0.77058	0.86729	1	13160	0	-4.1918	0.11704	0.15282	0.820419	1985	0	-4.1918
ZNF786	1	0.88295	0.88182	1	14986	0	-3.1477	0.11705	0.11818	0.820419	1986	0	-3.1477
AMER2	1	0.88285	0.88182	1	14985	0	-4.0231	0.11715	0.11818	0.820419	1987	0	-4.0231
CLCN2	1	0.88282	0.88182	1	14984	0	-2.3418	0.11718	0.11818	0.820419	1988	0	-2.3418
SETD6	4	0.95131	0.98313	1	16147	0	-5.6027	0.11733	0.15619	0.820419	1989	1	-5.6027
PPIB	1	0.88267	0.87972	1	14982	0	-2.1821	0.11733	0.12028	0.820419	1990	0	-2.1821
ZNF91	3	0.96431	0.98034	1	16367	0	-5.9822	0.11753	0.1781	0.820419	1991	1	-5.9822
CAPZB	1	0.88245	0.87972	1	14979	0	-3.7858	0.11755	0.12028	0.820419	1992	0	-3.7858
DRAP1	2	0.99625	0.99336	1	16928	0	-0.48177	0.11756	0.15659	0.820419	1993	0	-0.48177
SNAPC1	2	0.37502	0.65151	1	7433	1	-4.8122	0.11756	0.15659	0.820419	1994	0	-4.8122
RPL41	2	0.77141	0.86729	1	13174	0	-4.0781	0.11756	0.15659	0.820419	1995	0	-4.0781
CCT6B	2	0.23744	0.56074	1	5415	1	-5.0354	0.11756	0.15659	0.820419	1996	0	-5.0354
ANKRD44	2	0.86422	0.91692	1	14671	0	-3.7657	0.11756	0.15659	0.820419	1997	0	-3.7657
UBASH3A	3	0.20119	0.61179	1	4692	2	-8.127	0.1177	0.1781	0.820419	1998	1	-8.127
HDAC10	3	0.045666	0.27975	1	1254	1	-7.3651	0.11778	0.1781	0.820419	1999	1	-7.3651
[truncated: 14,986 more rows]
